# Supplementary material for: Amoeboid-like migration ensures correct horizontal cell layer formation in the developing vertebrate retina
Source: eLife. 2022 May 31;11:e76408. doi: 10.7554/eLife.76408 (PMC9208757; doi:10.7554/eLife.76408)
Supplement: Figure 1—source data 1. — Figure 1D; Figure 1—figure supplement 1 -Panel B. [file elife-76408-fig1-data1.xlsx]

## Sheet: Figure 1- Panel D
Figure 1- Panel D
before MG emergence-20200723-G2-n4			after MG emergence-20200723-G2-n2			before BC emergence-20200206-G1-n9b			BC-mature-20200206-G1-n6b
X movement (micron)	Y movement (micron)		X movement (micron)	Y movement (micron)		X movement (micron)	Y movement (micron)		X movement (micron)	Y movement (micron)
1.16846	-52.577		2.68733	-44.1646		17.447	-53.9		14.8	-34.74
2.33692	-51.6418		4.90705	-39.608		16.668	-53.588		15.579	-36.765
3.973	-52.577		4.20621	-36.5702		18.538	-55.302		15.579	-36.765
5.14146	-52.577		2.68733	-36.2198		20.096	-53.433		15.111	-37.388
4.67383	-55.1472		1.05245	-32.364		21.653	-54.679		14.177	-38.323
7.24396	-53.0435		0.584827	-34.2333		22.9	-49.538		13.398	-39.257
6.77634	-54.6795		1.05245	-30.9624		23.523	-48.292		11.372	-40.659
6.0755	-53.9787		0.584827	-28.9759		23.834	-48.292		10.594	-40.192
6.0755	-53.2779		-1.51888	-25.8209		24.613	-47.046		10.594	-40.815
6.0755	-53.2779		-0.81804	-24.4192		24.769	-47.046		9.97	-36.609
6.77634	-53.2779		-1.75209	-23.6012		23.99	-44.865		9.503	-36.609
6.0755	-52.577		-1.51888	-21.2643		22.276	-43.93		9.815	-36.609
6.0755	-52.577		-1.9853	-21.1471		23.367	-40.347		10.126	-37.076
6.0755	-53.2779		-1.16846	-21.4987		21.809	-41.749		10.282	-35.986
5.84229	-53.2779		-1.75209	-20.5634		21.186	-43.463		10.905	-33.026
6.0755	-53.2779		-1.75209	-22.6659		20.874	-43.307		11.061	-32.247
6.77634	-51.875		-0.116009	-22.3155		20.563	-44.397		9.503	-30.845
6.77634	-50.941		-1.05125	-21.8491		21.498	-45.644		9.036	-30.222
7.47718	-50.2401		-0.466427	-21.8491		21.186	-45.488		9.036	-28.508
9.34647	-43.9302		-0.466427	-21.2643		20.251	-47.046		9.036	-25.393
8.17921	-43.697		-0.700836	-20.5634		21.342	-46.422		8.568	-26.172
8.64563	-45.7995		-1.40167	-20.7966		21.498	-45.644		9.036	-24.77
9.58088	-45.0987		-2.57013	-25.1201		21.186	-45.176		10.594	-22.589
9.34647	-46.7347		-2.57013	-25.1201		20.719	-41.437		9.97	-18.071
10.9826	-43.2294		-1.40167	-23.6012		19.628	-40.191		9.815	-19.473
9.58088	-40.6592		-0.81804	-20.213		19.317	-40.814		10.594	-16.357
6.77634	-40.1916		-1.75209	-24.302		19.472	-41.437		9.036	-16.669
2.57013	-38.7899		-1.75209	-24.0688		19.472	-38.789		7.945	-16.825
3.27097	-35.9854		-1.75209	-26.9894		20.251	-37.387		7.945	-16.825
3.27097	-33.1821					21.03	-36.608		8.413	-15.578
3.27097	-33.1821					19.628	-35.05		8.257	-16.669
5.14146	-32.0136					19.005	-36.297		7.478	-16.202
5.37467	-29.9099					19.628	-35.829		6.699	-17.604
4.43942	-31.546					20.874	-31.623		8.413	-20.719
4.43942	-33.1821					22.276	-29.754		7.478	-22.277
3.03775	-35.0514					23.211	-27.261		8.568	-21.187
-0.467623	-37.8547					22.744	-28.508		8.413	-23.991
-1.16846	-37.1539					23.055	-28.663		8.413	-23.523
-2.80334	-37.3883					21.342	-30.221		9.347	-25.237
-3.9718	-36.6862					22.432	-30.221		10.126	-26.172
						22.121	-31.156		11.217	-26.172
						22.121	-30.377		12.775	-28.197
						22.276	-31.467		12.93	-29.599
						21.965	-35.05		13.865	-31.468
						21.03	-35.674		14.955	-31.78
						19.317	-38.945		15.267	-31.312
						19.005	-40.035		15.579	-32.247
						18.07	-39.88		17.604	-31.468
						17.759	-39.568		18.071	-31.468
						19.161	-38.01		17.76	-31.001
						19.161	-38.01		17.76	-31.001
						18.382	-37.543		16.825	-33.805
						17.915	-36.141		18.383	-28.82
						16.201	-34.427		17.915	-28.041
						16.201	-33.337		18.538	-27.106
						15.422	-31.312		18.85	-26.483
						13.864	-30.065		19.006	-24.925
						13.864	-27.884		18.85	-22.277
						13.553	-25.548		18.227	-20.875
						12.774	-28.508		17.915	-21.342
						10.281	-30.844		17.915	-20.096
						9.191	-29.287		18.227	-17.604
						7.945	-26.95		19.785	-18.538
						8.412	-23.678		19.629	-18.538
						8.568	-22.744		19.317	-19.473
						9.035	-21.342		18.538	-19.161
						9.502	-20.719		18.538	-19.94
						9.97	-20.563		19.317	-19.94
						9.347	-19.316		19.317	-19.94
						9.191	-19.784		19.317	-19.94
						8.412	-19.94		18.85	-20.252
						8.256	-21.497		17.136	-20.252
						7.166	-22.432		16.981	-21.81
						7.633	-22.899		17.915	-22.9
						6.387	-22.588		17.604	-21.187
						6.387	-23.523		17.292	-22.744
						7.321	-22.744		16.669	-21.654
						6.698	-21.497		16.669	-21.81
						6.075	-21.497		17.292	-23.056
						6.231	-21.342		17.915	-22.277
						6.075	-21.186		17.448	-22.277
						6.543	-21.653		17.136	-21.966
						6.698	-21.03		17.915	-19.317
						8.1	-21.03		18.383	-17.604
									18.694	-17.915
									19.785	-17.915
									20.719	-19.161
									20.408	-19.161

## Sheet: Figure 1- Figure Supplement 1
Figure 1- Figure Supplement 1-Panel B
HC migration trajectory	time (min)	y [micron]
	0	0
	5	-2.859
	10	-2.351
	15	-2.287
	20	-2.605
	25	-3.876
	30	-4.765
	35	-5.655
	40	-6.481
	45	-7.497
	50	-7.561
	55	-8.45
	60	-8.45
	65	-9.022
	70	-7.815
	75	-7.243
	80	-8.069
	85	-6.735
	90	-7.815
	95	-9.467
	100	-9.403
	105	-11.055
	110	-8.895
	115	-9.403
	120	-7.497
	125	-9.403
	130	-8.895
	135	-10.61
	140	-11.881
	145	-12.262
	150	-13.215
	155	-14.232
	160	-16.646
	165	-15.756
	170	-16.074
	175	-17.281
	180	-16.582
	185	-17.408
	190	-16.582
	195	-17.345
	200	-15.947
	205	-14.93
	210	-13.914
	215	-13.66
	220	-14.93
	225	-16.074
	230	-16.519
	235	-17.789
	240	-18.171
	245	-21.411
	250	-22.364
	255	-22.682
	260	-22.427
	265	-22.618
	270	-22.364
	275	-22.491
	280	-21.856
	285	-20.649
	290	-21.157
	295	-20.903
	300	-22.046
	305	-23.19
	310	-23.952
	315	-24.333
	320	-25.032
	325	-24.969
	330	-24.588
	335	-24.905
	340	-24.778
	345	-24.333
	350	-26.112
	355	-28.082
	360	-28.908
	365	-29.67
	370	-29.734
	375	-29.035
	380	-29.035
	385	-29.67
	390	-29.924
	395	-29.543
	400	-28.781
	405	-28.844
	410	-28.082
	415	-27.32
	420	-25.858
	425	-25.35
	430	-26.557
	435	-26.811
	440	-25.35
	445	-24.27
	450	-24.588
	455	-24.016
	460	-22.999
	465	-22.555
	470	-21.157
	475	-21.729
	480	-19.759
	485	-18.933
	490	-18.552
	495	-16.9
	500	-16.201
	505	-16.964
	510	-16.709
	515	-18.425
	520	-18.552
	525	-19.124
	530	-17.917
	535	-17.091
	540	-15.82
	545	-16.265
	550	-15.756
	555	-15.312
	560	-16.201
	565	-15.312
	570	-14.867
	575	-13.977
	580	-13.787
	585	-13.596
	590	-13.406
	595	-12.834
	600	-11.436
	605	-10.737
	610	-11.309
	615	-10.991
	620	-10.674
	625	-10.547
	630	-10.547
	635	-10.547
	640	-10.293
	645	-10.61
	650	-10.801
	655	-11.436
	660	-12.834
	665	-13.406
	670	-13.088
	675	-12.897
	680	-12.008
	685	-11.373
	690	-10.737
	695	-10.483
	700	-10.293
	705	-10.483
	710	-11.817
	715	-11.754
	720	-11.69
	725	-11.69
	730	-11.69
	735	-11.69
	740	-11.118
	745	-10.864
	750	-9.848
	755	-9.53
	760	-8.132
	765	-8.323
	770	-8.323
	775	-8.387
	780	-8.387
	785	-8.387
	790	-8.387
	795	-8.45
	800	-7.497
	805	-7.434
	810	-7.561
	815	-7.561
