# Supplementary material for: Amoeboid-like migration ensures correct horizontal cell layer formation in the developing vertebrate retina
Source: eLife. 2022 May 31;11:e76408. doi: 10.7554/eLife.76408 (PMC9208757; doi:10.7554/eLife.76408)
Supplement: Figure 2—source data 1. [file elife-76408-fig2-data1.xlsx]

## Sheet: Figure 2- Figure Supp 1C'' 
Figure 2- Figure Supplement 1C''
apical to GCL distance (micron)	LAP2b-eGFP intensity	mKate2-ras intensity
0	58.14	189.745
0.099	53.78	195.04
0.198	50.4	199.12
0.298	45.33	200.265
0.397	38.01	199.48
0.496	31.73	200.2
0.595	29.12	202.385
0.695	28.56	202.945
0.794	26.48	201.755
0.893	21.46	201.63
0.992	16.13	203.71
1.092	13.62	205.845
1.191	13.38	205.775
1.29	13.62	203.945
1.389	13.69	202.33
1.488	13.7	202.22
1.588	14.1	203.85
1.687	15.08	205.11
1.786	16.68	203.485
1.885	18.67	200.825
1.985	21.42	199.985
2.084	25.71	199.99
2.183	30.72	199.535
2.282	34.27	198.58
2.381	35.53	196.415
2.481	36.95	194.105
2.58	40.47	194.025
2.679	45.07	194.87
2.778	49.92	193.605
2.878	54.82	190.625
2.977	57.48	188.135
3.076	57.43	186.955
3.175	58.62	186.115
3.275	63.24	183.995
3.374	68.63	180.7
3.473	72.34	178.395
3.572	74.79	177.65
3.671	76.36	177.14
3.771	76.57	175.685
3.87	76.23	172.58
3.969	77.1	168.355
4.068	80.87	165.215
4.168	87.57	164.42
4.267	94.41	164.97
4.366	98.59	165.69
4.465	100.02	166.115
4.565	100.57	166.12
4.664	100.59	165.33
4.763	99.47	163.89
4.862	99.06	162.91
4.961	100.91	162.995
5.061	103.26	163.525
5.16	104.86	163.74
5.259	106.59	163.095
5.358	108.38	161.18
5.458	108.86	157.955
5.557	108.88	154.125
5.656	109.78	151.595
5.755	110.54	150.305
5.854	109.25	147.26
5.954	107.05	141.835
6.053	105.76	137.175
6.152	106.5	134.235
6.251	109.38	130.45
6.351	112.29	126.225
6.45	112.47	124.485
6.549	111.7	124.95
6.648	112.42	125.05
6.748	113.74	124.97
6.847	114.11	126.015
6.946	114.52	126.11
7.045	116.38	123.25
7.144	118.79	119.94
7.244	120.44	120.41
7.343	120.58	124.115
7.442	119.68	125.615
7.541	119.44	122.425
7.641	120.69	118.93
7.74	122.27	119.735
7.839	122.52	122.59
7.938	121.54	122.58
8.038	120.36	121.27
8.137	120.55	123.935
8.236	122.98	128.4
8.335	126.19	128.73
8.434	127.87	126.765
8.534	126.78	126.7
8.633	124.42	126.15
8.732	124.19	122.39
8.831	126.72	119.005
8.931	128.58	119.23
9.03	127.61	119.795
9.129	124.98	117.385
9.228	124.03	114.425
9.328	126.56	114.745
9.427	130.29	118.96
9.526	130.93	123.575
9.625	128.61	123.835
9.724	127.5	119.435
9.824	129.57	115.905
9.923	132.42	117.415
10.022	133.19	121.035
10.121	132	122.175
10.221	130.56	121.64
10.32	129.71	123.085
10.419	129.2	127.01
10.518	128.63	130.805
10.617	128.14	132.035
10.717	128.54	131.24
10.816	130.08	130.525
10.915	132.31	130.275
11.014	134.28	130.645
11.114	135.12	132.17
11.213	134.49	133.68
11.312	133.08	133.635
11.411	132.55	132.58
11.511	133.47	132.1
11.61	134.19	132.985
11.709	132.73	135.095
11.808	129.22	136.735
11.907	126.96	136
12.007	128.52	134.06
12.106	132.28	134.485
12.205	134.44	138.4
12.304	132.38	142.3
12.404	127.5	142.68
12.503	124.54	141.08
12.602	125.39	140.665
12.701	128.01	140.735
12.801	129.38	139.01
12.9	128.61	136.21
12.999	125.96	135.46
13.098	122.68	138.465
13.197	120.64	142.39
13.297	119.91	143.535
13.396	119.11	142.15
13.495	118.1	140.285
13.594	116.89	139.075
13.694	115.3	138.525
13.793	113.97	139.105
13.892	113.38	141.33
13.991	112.83	143.195
14.09	111.77	142.065
14.19	110.3	138.9
14.289	108.63	136.44
14.388	107.53	134.77
14.487	108.56	133.555
14.587	110.66	133.365
14.686	110.8	132.39
14.785	108.36	128.46
14.884	104.74	124.32
14.984	101.3	125.87
15.083	100.25	133.385
15.182	102.21	139.865
15.281	104.05	140.335
15.38	103.1	136.805
15.48	99.14	134.175
15.579	93.15	135.585
15.678	88.75	140.065
15.777	88.77	143.55
15.877	91.32	143.79
15.976	91.85	142.86
16.075	89.19	143.3
16.174	85.13	144.185
16.274	81.87	143.845
16.373	79.84	143.25
16.472	78.27	145.125
16.571	77.36	149.77
16.67	76.52	153.58
16.77	74.31	154.83
16.869	71.38	155.83
16.968	69.03	157.3
17.067	66.9	157.735
17.167	64.67	157.55
17.266	63.42	157.75
17.365	63.47	157.355
17.464	64.6	155
17.563	66.03	151.52
17.663	66.52	148.125
17.762	66.12	144.36
17.861	66.05	140.3
17.96	67.39	137.74
18.06	70.27	136.07
18.159	73.1	131.535
18.258	75.17	124.415
18.357	78.21	119.6
18.457	84.12	119.22
18.556	90.84	120.33
18.655	95.24	120.765
18.754	97.11	122.4
18.853	99.61	126.155
18.953	103.78	130.23
19.052	108.02	133.2
19.151	111.69	134.38
19.25	116.09	133.99
19.35	121.2	133.77
19.449	124.92	135.365
19.548	126.51	139.19
19.647	128.24	143.755
19.747	131.52	146.39
19.846	135.03	147.085
19.945	137.13	147.595
20.044	138.21	147.555
20.143	140.01	146.525
20.243	142.49	146.39
20.342	143.71	148.775
20.441	142.53	152.47
20.54	140.67	155.99
20.64	139.26	159.985
20.739	138.04	163.125
20.838	137.8	161.41
20.937	140.44	154.895
21.037	144.6	149.04
21.136	146.79	147.585
21.235	145.91	148.765
21.334	143.76	148.165
21.433	141.96	143.245
21.533	140.57	135.56
21.632	140.37	127.755
21.731	142.35	120.605
21.83	145.3	113.76
21.93	146.47	107.25
22.029	146.03	101.82
22.128	145.72	97.115
22.227	145.44	91.285
22.326	143.95	86.005
22.426	143.24	85.39
22.525	146.17	88.31
22.624	149.86	90.545
22.723	149.56	91.695
22.823	146.53	94.25
22.922	145.65	98.63
23.021	147.47	103.06
23.12	148.39	105.57
23.22	148.39	106.745
23.319	150.11	109.965
23.418	153.23	115.385
23.517	156.03	119.85
23.616	158.13	123.03
23.716	158.99	126.015
23.815	157.4	127.345
23.914	155	126.785
24.013	155.64	127.1
24.113	159.06	128.915
24.212	161.47	130.145
24.311	161.96	130.845
24.41	161.81	132.055
24.51	160.99	132.37
24.609	159.83	130.085
24.708	160.29	126.165
24.807	162.2	123.02
24.906	163.57	121.2
25.006	164.05	119.69
25.105	164.69	117.135
25.204	166.15	112.01
25.303	166.92	106.15
25.403	164.65	104.215
25.502	161.14	106.235
25.601	160.39	107.98
25.7	162.8	108.47
25.799	165.07	110.08
25.899	164.74	113.215
25.998	162.61	115.75
26.097	161.22	115.625
26.196	161.13	113.44
26.296	160.53	113.035
26.395	160.29	117.205
26.494	162.76	123.965
26.593	166.99	129.54
26.693	170.58	132.435
26.792	173.63	133.275
26.891	176.08	133.58
26.99	176.29	133.53
27.089	175.76	132.475
27.189	177.02	131.01
27.288	179.45	130.5
27.387	181	132.115
27.486	181.1	135.42
27.586	180.54	138.315
27.685	180.54	138.795
27.784	181.38	137.615
27.883	182.47	136.98
27.983	182.76	136.735
28.082	181.3	137.1
28.181	179.4	141.28
28.28	179.99	149.395
28.379	183.06	155.455
28.479	185.66	155.565
28.578	187.07	152.65
28.677	187.68	150.415
28.776	186.95	149.005
28.876	184.99	148.065
28.975	183.3	148.355
29.074	183.51	149.38
29.173	186.08	149.835
29.272	189.21	150.21
29.372	190.91	150.915
29.471	191.4	151.72
29.57	190.68	152.875
29.669	188.19	154.02
29.769	185.59	155.775
29.868	185.37	158.42
29.967	186.68	159.57
30.066	187.2	157.755
30.166	186.01	155.29
30.265	184.75	154.455
30.364	184.9	154.435
30.463	187.45	153.74
30.562	191.4	152.115
30.662	193.76	150.495
30.761	193.08	149.115
30.86	191.56	147.18
30.959	191.39	144.66
31.059	192.22	142.955
31.158	192.59	143.345
31.257	191.25	144.67
31.356	188.07	144.76
31.456	184.33	143.53
31.555	182.9	142.44
31.654	185.2	141.395
31.753	188.45	138.82
31.852	188.97	134.825
31.952	187.34	131.8
32.051	187.16	132.225
32.15	188.73	135.58
32.249	188.67	138.665
32.349	186.17	140.205
32.448	185.15	140.225
32.547	186.62	137.495
32.646	187.46	133.39
32.746	185.95	131.765
32.845	183.85	131.52
32.944	182.09	128.745
33.043	180.23	124.225
33.142	178.95	120.745
33.242	178.42	119.49
33.341	176.48	122.44
33.44	171.74	129.835
33.539	167.07	135.47
33.639	165.74	133.145
33.738	166.75	125.48
33.837	167.51	118.545
33.936	167.15	113.935
34.035	165.87	111.68
34.135	163.02	111.365
34.234	159.67	109.465
34.333	158.33	104.015
34.432	159.22	98.73
34.532	159.47	97.245
34.631	159.04	98.5
34.73	160.3	98.625
34.829	161.9	95.18
34.929	160.68	90.65
35.028	157.93	90.335
35.127	157.12	94.57
35.226	157.99	97.38
35.325	159.43	96.47
35.425	160.3	95.675
35.524	159.13	97.465
35.623	156.67	101.36
35.722	155.48	105.825
35.822	156.67	106.85
35.921	158.88	102.53
36.02	160.43	98.205
36.119	161.76	98.145
36.219	163.53	99.715
36.318	164.33	99.65
36.417	163.39	98.405
36.516	161.73	98.06
36.615	161.83	99.65
36.715	165.05	102.215
36.814	169.39	103.515
36.913	171.18	101.965
37.012	169.5	98.945
37.112	167.35	97.825
37.211	167.26	100.59
37.31	168.41	106.77
37.409	168.75	113.455
37.508	168.79	116.795
37.608	169.84	115.72
37.707	171.55	113.625
37.806	173.83	113.49
37.905	175.93	113.82
38.005	176.34	113
38.104	174.83	111.7
38.203	173.42	110.6
38.302	173.48	111.015
38.402	175.65	113.335
38.501	179.36	114.935
38.6	183.13	114.61
38.699	185.52	114.45
38.798	185.9	115.625
38.898	184.58	117.47
38.997	181.83	119.825
39.096	179.34	121.975
39.195	178.8	121.925
39.295	179.65	120.355
39.394	179.88	120.53
39.493	179.31	122.175
39.592	179.5	122.42
39.692	181.11	121.585
39.791	181.68	120.435
39.89	179.76	118.53
39.989	177.29	118.8
40.088	176.85	123.9
40.188	178.57	130.395
40.287	181.09	133.23
40.386	183.54	130.975
40.485	184.98	126.555
40.585	184.77	124.5
40.684	183.76	125.925
40.783	183.16	127.695
40.882	182.13	127.03
40.981	179.7	123.225
41.081	177.8	116.025
41.18	178.23	108.04
41.279	178.99	105.01
41.378	177	109.725
41.478	172.98	117.69
41.577	169.45	122.23
41.676	167.38	122.165
41.775	166.66	121.31
41.875	165.42	121.4
41.974	162.48	119.365
42.073	159.89	113.37
42.172	159.93	107.15
42.271	161.85	103.875
42.371	163.79	101.125
42.47	165.82	97.305
42.569	167.98	96.28
42.668	169.18	99.965
42.768	169.74	103.69
42.867	170.47	103.235
42.966	171.13	99.93
43.065	171.56	98.3
43.165	171.44	100.435
43.264	170.62	102.99
43.363	170.28	103.605
43.462	171.23	104.445
43.561	172.56	106.005
43.661	173.03	106.46
43.76	171.91	107.115
43.859	169.94	109.1
43.958	168.97	108.9
44.058	169.98	104.12
44.157	171.73	98.265
44.256	172.78	96.25
44.355	173.09	98.295
44.455	173.08	101.02
44.554	173.01	101.355
44.653	173.01	99.625
44.752	173.41	98.075
44.851	174.29	96.715
44.951	174.69	95.43
45.05	173.27	95.905
45.149	170.89	98.005
45.248	170.58	98.55
45.348	173.25	96.48
45.447	176.02	94.445
45.546	176.39	93.51
45.645	174.8	93.29
45.744	173.21	95.1
45.844	173.21	97.49
45.943	174.09	96.855
46.042	173.94	96.325
46.141	172.24	101.36
46.241	170.94	108.375
46.34	170.98	109.455
46.439	171.67	105.615
46.538	172.88	104.165
46.638	174.66	106.45
46.737	175.94	108.16
46.836	175.75	108.215
46.935	174.57	109.88
47.034	173.5	113.305
47.134	172.87	113.86
47.233	173.18	109.915
47.332	174.81	105.89
47.431	176.66	105.835
47.531	176.87	108.51
47.63	175.22	111.215
47.729	173.64	113.465
47.828	172.75	115.15
47.928	171.68	116.29
48.027	169.19	117.415
48.126	166.6	118.25
48.225	166.66	117.805
48.324	169.57	115.795
48.424	172.58	113.14
48.523	173.45	111.635
48.622	173.1	113.18
48.721	172.85	117.705
48.821	172.47	121.92
48.92	171.86	123.66
49.019	171.59	125.3
49.118	171.55	128.415
49.217	171.49	130.415
49.317	171.53	129.09
49.416	170.9	126.52
49.515	169.09	126.975
49.614	167.04	131.175
49.714	166.39	134.195
49.813	166.87	132.19
49.912	167.45	128.095
50.011	168.94	125.315
50.111	171.73	122.48
50.21	174	118.235
50.309	174.88	114.045
50.408	176.71	111.435
50.507	181.07	109.88
50.607	185.19	108.675
50.706	185.62	108
50.805	183.34	106.945
50.904	182.12	105.045
51.004	183.63	104.055
51.103	185.56	104.69
51.202	185.83	105.91
51.301	185.56	108.005
51.401	186.6	112.58
51.5	188	119.125
51.599	187.78	123.705
51.698	186.67	123.51
51.797	186.7	120.53
51.897	187.58	119.27
51.996	187.5	121.48
52.095	186.63	124.06
52.194	186.23	124.615
52.294	187.47	124.63
52.393	190.31	125.735
52.492	192.53	128.035
52.591	191.66	130.31
52.69	189.2	129.995
52.79	188.73	126.255
52.889	189.71	121.795
52.988	190.12	119.27
53.087	190.55	118.555
53.187	191.29	117.74
53.286	191.52	116.265
53.385	191.25	116.81
53.484	190.59	121.215
53.584	189.6	125.005
53.683	188.49	123.25
53.782	187.78	117.475
53.881	186.09	112.205
53.98	183.33	110.86
54.08	181.95	112.035
54.179	182.74	110.89
54.278	184.11	107.51
54.377	184.19	107.53
54.477	182.73	112.55
54.576	180.59	117.31
54.675	179.71	118.155
54.774	180.42	117.145
54.874	181.35	117.785
54.973	182.43	121.68
55.072	184.12	127.79
55.171	185.65	133.08
55.27	185.76	135.345
55.37	184.43	134.85
55.469	183.18	133.11
55.568	183.44	131.605
55.667	184.61	130.49
55.767	185.12	128.085
55.866	184.88	125.15
55.965	183.89	125.91
56.064	182.75	130.585
56.164	183.37	133.265
56.263	185.44	130.82
56.362	187.03	127.585
56.461	187.65	127.69
56.56	188.51	129.365
56.66	189.37	129.625
56.759	188.86	128.745
56.858	187.74	128.36
56.957	188.19	129.17
57.057	189.55	132.035
57.156	189.78	135.705
57.255	188.4	136.24
57.354	187.23	132.88
57.453	187.84	129.845
57.553	189.57	130.265
57.652	190.49	131.59
57.751	189.91	129.935
57.85	188.52	124.655
57.95	187.27	117.085
58.049	186.58	109.68
58.148	186.37	106.82
58.247	186.5	109.985
58.347	186.08	113.835
58.446	185.06	113.395
58.545	184.23	111.07
58.644	183.85	109.785
58.743	183.19	106.9
58.843	182.84	101.525
58.942	182.84	98.72
59.041	182.66	100.355
59.14	182.17	100.48
59.24	182.02	95.725
59.339	183.25	90.89
59.438	186.11	89.83
59.537	188.2	89.49
59.637	188.22	86.405
59.736	188.33	83.075
59.835	189.64	83.5
59.934	190.63	87.16
60.033	191.11	92.295
60.133	191.72	98.7
60.232	192.62	105.04
60.331	193.85	108.81
60.43	195.29	109.235
60.53	196.37	108.955
60.629	197.18	112.435
60.728	198.02	119.285
60.827	198.41	123.725
60.926	197.67	124.115
61.026	196.59	125.58
61.125	197.61	130.905
61.224	200.37	136.51
61.323	201.79	139.31
61.423	201.06	139.83
61.522	200.35	139.335
61.621	199.92	138.955
61.72	198.82	139.16
61.82	198.01	138.955
61.919	198.07	138.285
62.018	198.7	139.68
62.117	199.84	144.39
62.216	200.98	148.86
62.316	201.14	149.2
62.415	200.56	146.62
62.514	199.87	145.685
62.613	200.1	148.885
62.713	201.83	154.03
62.812	203.27	156.225
62.911	202.44	154.01
63.01	200.63	152.025
63.11	199.74	153.815
63.209	199.92	156.24
63.308	200.46	155.45
63.407	201.08	153.395
63.506	202.31	153.605
63.606	203.97	155.12
63.705	205.22	154.985
63.804	204.82	153.78
63.903	203.27	153.935
64.003	202.47	154.65
64.102	203.13	153.85
64.201	203.84	151.605
64.3	203.48	149.855
64.399	202.65	150.88
64.499	202.24	154.1
64.598	201.93	156.12
64.697	201.4	155.94
64.796	201.14	155.42
64.896	200.57	154.91
64.995	199.91	154.125
65.094	200.5	154.15
65.193	202.53	154.93
65.293	204.2	154.985
65.392	204.72	154.435
65.491	204.01	154.6
65.59	202.34	154.725
65.689	200.17	152.41
65.789	198.33	148.16
65.888	197.44	145.15
65.987	197.86	144.12
66.086	199.78	141.565
66.186	202.21	135.72
66.285	202.88	131.235
66.384	201.47	132.52
66.483	199.63	136.95
66.583	198.98	140.305
66.682	198.11	141.725
66.781	195.15	141.03
66.88	192.1	138.905
66.979	191.08	137.335
67.079	191.26	136.675
67.178	190.85	135.05
67.277	190.17	132.83
67.376	190.65	133.23
67.476	191.97	135.745
67.575	192.54	136.015
67.674	191.3	133.045
67.773	188.58	130.15
67.872	186.04	129.02
67.972	184.75	129.46
68.071	184.2	131.29
68.17	183.88	131.3
68.269	183.33	127.26
68.369	181.08	123.895
68.468	175.85	125.57
68.567	169.63	128.81
68.666	166.17	129.59
68.766	165.05	129.685
68.865	163.39	131.015
68.964	160.66	131.71
69.063	157.23	131.39
69.162	153.06	133.495
69.262	149.83	138.485
69.361	148.23	141.58
69.46	145.08	140.31
69.559	139.15	137.525
69.659	131.87	135.155
69.758	124.03	132.345
69.857	116.88	128.98
69.956	112.22	125.8
70.056	109.3	123.665
70.155	105.5	123.45
70.254	99.93	124.36
70.353	94.69	125.445
70.452	91.04	126.88
70.552	87.36	129.47
70.651	82.65	135.31
70.75	79.07	144.095
70.849	77.81	151.54
70.949	76.15	155.36
71.048	72.62	157.455
71.147	69.77	158.95
71.246	68.59	159.58
71.346	66.05	161.145
71.445	61	164.95
71.544	56.69	168.68
71.643	54.51	169.645
71.742	52.96	168.53
71.842	50.37	168.195
71.941	45.78	170.01
72.04	40.32	172.405
72.139	36.58	173.25
72.239	33.93	173.18
72.338	30.43	173.57
72.437	27.07	173.345
72.536	25.12	172.44
72.635	23.69	172.58
72.735	21.36	173.945
72.834	17.68	175.13
72.933	14.41	173.775
73.032	13.4	169.765
73.132	13.55	168.27
73.231	13.9	172.815
73.33	15.3	178.225
73.429	17.29	177.865
73.529	17.95	172.705
73.628	17.05	168.685
73.727	15.29	169.585
73.826	13.76	173.6
73.925	13.26	176.105
74.025	13.78	175.615
74.124	14.78	175.14
74.223	16.03	176.575
74.322	17.48	177.985
74.422	18.4	178.075
74.521	18.17	177.87
74.62	17.81	178.485
74.719	17.52	180.76
74.819	17.05	184.1
74.918	17.59	184.665
75.017	19.53	179.705
75.116	22.12	173.945
75.215	24.66	173.84
75.315	26.57	177.69
75.414	26.55	179.62
75.513	23.81	178.29
75.612	19.73	176.51
75.712	17.38	175.795
75.811	17.28	176.055
75.91	17.58	176.88
76.009	16.71	176.885
76.108	14.2	175.52
76.208	11.42	174.305
76.307	10.16	174.78
76.406	11.74	176.91
76.505	15	179.62
76.605	16.24	180.56
76.704	14.47	177.47
76.803	12.9	172.635
76.902	13.59	170.92
77.002	13.84	172.445
77.101	12	173.615
77.2	10.34	173.955
77.299	10.55	175.12
77.398	11.54	176.355
77.498	12.22	176.91
77.597	12.89	177.5
77.696	13.23	178.15
77.795	12.18	178.36
77.895	11.03	178.22
77.994	11.03	178.275
78.093	11.87	179.395
78.192	12.26	181.85
78.292	11.64	184.235
78.391	10.33	185.625
78.49	9.22	186.645
78.589	8.66	187.74
78.688	8.33	188.755
78.788	8.97	189.74
78.887	11.58	190.655
78.986	15.09	191.44
79.085	16.8	192.395
79.185	15.46	193.19
79.284	13.08	193.295
79.383	12.08	192.62
79.482	12.97	191.66
79.581	14.02	192.12
79.681	14.2	194.345
79.78	14.48	195.815
79.879	15.99	195.435
79.978	17.13	194.66
80.078	16.75	194.435
80.177	15.59	195.1
80.276	14.31	196.21
80.375	13.18	196.975
80.475	13.09	198.32
80.574	14.42	201.045
80.673	16.16	203.04
80.772	16.63	202.395
80.871	15.41	200.825
80.971	14.91	200.185
81.07	17.21	199.46
81.169	20.53	198.685
81.268	21.68	199.745
81.368	20.89	201.95
81.467	21.2	203.305
81.566	24.82	204.4
81.665	29.21	206.285
81.765	30.5	207.235
81.864	29.55	206.035
81.963	28.98	204.895
82.062	28.15	206.175
82.161	26.03	208.695
82.261	23.07	209.765
82.36	20.54	209.34
82.459	19.25	208.395
82.558	18.99	207.315
82.658	19.06	206.955
82.757	18.6	207.59
82.856	17.24	208.34
82.955	16.8	208.565
83.055	18.87	208.32
83.154	21.49	208.09
83.253	21.91	208.715
83.352	20.37	209.77
83.451	18.83	209.925
83.551	18.42	208.82
83.65	19.03	207.235
83.749	20.66	206.015
83.848	23.04	205.17
83.948	25.81	203.855
84.047	28	201.395
84.146	27.91	198.685
84.245	25.68	196.825
84.344	24.02	194.365
84.444	24.91	189.37
84.543	27.67	183.605
84.642	31.28	180.085
84.741	35.07	178.085
84.841	38.29	175.62
84.94	40.65	173.785
85.039	43.17	173.655
85.138	47.06	172.695
85.238	52.67	168.99
85.337	59.37	164.69
85.436	64.52	161.64
85.535	66.74	159.565
85.634	67.41	159.395
85.734	69.29	161.605
85.833	71.78	162.335
85.932	73.47	157.08
86.031	75.77	147.21
86.131	79.48	139.585
86.23	82.47	138.6
86.329	84.14	141.305
86.428	86.38	143.065
86.528	88.83	142.42
86.627	90.35	138.525
86.726	93.11	132.59
86.825	99.62	130.41
86.924	108	134.73
87.024	114.03	139.6
87.123	115.97	139.27
87.222	116.38	136.095
87.321	118.51	134.97
87.421	123.05	135.585
87.52	127.51	135.46
87.619	130.61	135.295
87.718	134.55	137.005
87.817	140.09	141.55
87.917	144	147.655
88.016	144.51	151.26
88.115	144.15	150.76
88.214	145.57	149.81
88.314	149.24	150.205
88.413	153.56	149.99
88.512	156.25	150.15
88.611	156.6	152.92
88.711	156.51	156.66
88.81	157.54	158.925
88.909	158.94	159.92
89.008	160.05	160.65
89.107	161.52	161.595
89.207	163.66	162.46
89.306	165.11	162.43
89.405	164.71	162.575
89.504	163.81	164.74
89.604	164.43	167.045
89.703	165.93	166.295
89.802	167.24	163.92
89.901	168.63	163.44
90.001	170.25	165.81
90.1	170.29	169.825
90.199	168.53	173.135
90.298	168.21	173.64
90.397	170.45	172.09
90.497	172.89	170.485
90.596	173.71	169.545
90.695	173.79	170.21
90.794	173.59	172.93
90.894	172.95	175.02
90.993	172.11	173.845
91.092	172.41	170.75
91.191	174.11	168.465
91.29	175.98	167.64
91.39	176.75	168.17
91.489	176.75	170.015
91.588	176.62	170.765
91.687	176.14	167.745
91.787	174.94	162.84
91.886	173.98	160.455
91.985	174.27	161.285
92.084	175.3	162.905
92.184	175.78	163.615
92.283	174.71	162.845
92.382	173.31	160.615
92.481	173.46	158.57
92.58	174.72	159.215
92.68	174.86	162.115
92.779	173.68	164.115
92.878	172.46	163.03
92.977	171.31	160.22
93.077	169.74	158.765
93.176	167.91	159.335
93.275	166.13	159.8
93.374	164.88	158.855
93.474	164.09	158.64
93.573	164.06	161.24
93.672	164.86	164.73
93.771	166.79	165.53
93.87	170.04	162.25
93.97	174.01	156.385
94.069	175.97	150.78
94.168	174.51	146.315
94.267	172.78	140.85
94.367	173.69	133.09
94.466	176.1	124.45
94.565	177.78	117.73
94.664	178.74	114.825
94.764	179.1	114.96
94.863	178.38	115.895
94.962	176.9	116.635
95.061	175.98	117.395
95.16	175.46	117.825
95.26	174.11	118.345
95.359	172.71	121.05
95.458	173.09	124.415
95.557	174.9	123.275
95.657	177.39	119.555
95.756	180.7	121.58
95.855	183.35	130.465
95.954	183.74	138.755
96.053	182.97	141.7
96.153	183.37	141.17
96.252	185.38	142.18
96.351	188.42	147.145
96.45	191.12	152.555
96.55	192.34	155.015
96.649	192.47	155.43
96.748	192.83	155.815
96.847	193.62	157.825
96.947	193.79	161.9
97.046	193.69	164.83
97.145	195.04	163.275
97.244	198.22	159.55
97.343	201.2	158.615
97.443	201.42	161.065
97.542	199.54	164.225
97.641	198.75	167.17
97.74	199.86	169.71
97.84	201.65	170.73
97.939	203.61	170.33
98.038	205.19	170.165
98.137	206.09	170.62
98.237	206.86	170.06
98.336	206.46	168.14
98.435	203.89	167.715
98.534	201.14	170.595
98.633	201.51	174.02
98.733	204.6	174.55
98.832	207.62	172.275
98.931	208.61	169.88
99.03	207.19	169.495
99.13	204.65	171.255
99.229	203.44	173.74
99.328	204.12	175.795
99.427	206.14	176.895
99.526	208.51	176.35
99.626	209.93	173.635
99.725	209.82	170.23
99.824	209.17	169.47
99.923	208.79	172.51
100.023	208.32	175.935
100.122	207.59	175.675
100.221	207.52	172.975
100.32	208.03	171.965
100.42	208.68	173.105
100.519	209.42	173.6
100.618	209.85	172.52
100.717	209.76	171.825
100.816	209.1	172.45
100.916	208.12	172.645
101.015	208.03	172.305
101.114	209.95	172.915
101.213	212.8	172.955
101.313	214.29	170.675
101.412	213.71	169.215
101.511	212.25	171.715
101.61	211.04	175.31
101.71	210.49	175.435
101.809	209.87	172.195
101.908	208.43	169.14
102.007	207.19	167.965
102.106	207.7	168.43
102.206	209.27	171.215
102.305	210.41	175.46
102.404	210.7	177.49
102.503	210.67	175.785
102.603	211.27	172.555
102.702	212.98	170.41
102.801	213.72	168.94
102.9	211.82	165.895
102.999	208.8	161.98
103.099	207.18	160.505
103.198	207.53	161.715
103.297	209.07	162.025
103.396	210.46	159.705
103.496	211.06	157.075
103.595	210.45	155.565
103.694	208.77	153.29
103.793	207.18	149.45
103.893	206.89	146.53
103.992	207.83	145.735
104.091	208.59	143.85
104.19	208.66	139.75
104.289	208.96	138.18
104.389	209.8	140.745
104.488	210.15	142.11
104.587	208.94	138.89
104.686	207.45	134.78
104.786	207.05	134.035
104.885	207.83	136.19
104.984	208.8	138.885
105.083	208.28	140.025
105.183	206.2	137.985
105.282	205.01	133.48
105.381	205.63	131.135
105.48	206.86	134.645
105.579	207.58	141.28
105.679	208.15	145.93
105.778	208.4	147.225
105.877	208.08	147.065
105.976	208.16	147.61
106.076	208.51	150.495
106.175	207.67	155.79
106.274	206.18	160.98
106.373	206.36	163.57
106.473	207.9	163.675
106.572	209.31	163.765
106.671	210.01	165.935
106.77	209.14	169.08
106.869	206.61	171.235
106.969	204.08	172.46
107.068	203.37	173.065
107.167	204.41	172.395
107.266	204.68	170.615
107.366	203.35	168.51
107.465	201.66	166.885
107.564	200.98	167.225
107.663	200.7	169.67
107.762	200.87	171.37
107.862	201.85	169.475
107.961	203.35	165.25
108.06	204.69	162.49
108.159	205.3	162.35
108.259	205.11	162.425
108.358	204.68	160.89
108.457	204.15	158.96
108.556	203.77	158.035
108.656	204.03	158.135
108.755	204.41	159.53
108.854	204.56	161.19
108.953	203.86	160.425
109.052	201.79	156.85
109.152	199.04	153.75
109.251	197.62	153.61
109.35	197.42	154.89
109.449	197.31	156.42
109.549	197.87	159.145
