# Supplementary material for: Amoeboid-like migration ensures correct horizontal cell layer formation in the developing vertebrate retina
Source: eLife. 2022 May 31;11:e76408. doi: 10.7554/eLife.76408 (PMC9208757; doi:10.7554/eLife.76408)
Supplement: Figure 3—source data 1. [file elife-76408-fig3-data1.xlsx]

## Sheet: Figure 3-Panel C-E
Figure 3- Panel C				Figure 3- Panel D				Figure 3- Panel E
Perimeter (um)				Elongation ratio				Sphericity (%)
time (min)	Trbeta	LAP		time (min)	Trbeta	LAP		time (min)	Trbeta	LAP
-80	31.5562	30.3526		-80	2.17779	2.31328		-80	83.3907	86.6976
-75	37.2459	30.3995		-75	2.95467	2.20861		-75	74.302	87.2654
-70	31.5942	30.8522		-70	2.21235	2.1724		-70	86.1412	87.1206
-65	32.3088	30.6358		-65	2.63241	2.21269		-65	81.7017	88.2151
-60	31.0398	29.2817		-60	2.54271	2.07376		-60	83.7589	88.06
-55	31.3535	29.2588		-55	2.18727	1.84914		-55	86.0116	90.5902
-50	33.8423	32.2193		-50	2.72293	2.44685		-50	79.0663	84.6474
-45	33.6553	31.211		-45	3.14511	2.751		-45	76.0757	83.9911
-40	32.7956	29.3335		-40	2.35013	2.16543		-40	76.8898	86.7394
-35	28.9226	27.1173		-35	2.06696	1.96722		-35	83.73	88.8832
-30	29.1926	26.7013		-30	1.96496	1.83785		-30	85.1322	90.7328
-25	29.8078	27.5371		-25	2.26464	1.9671		-25	84.5807	90.6525
-20	42.0731	28.8062		-20	3.30034	2.12329		-20	66.0853	89.1741
-15	34.5104	26.5983		-15	2.41624	1.87466		-15	80.5673	92.6892
-10	33.0102	27.4843		-10	2.4198	1.7563		-10	83.7572	93.3609
-5	26.5214	26.2441		-5	1.50406	1.47603		-5	95.6339	95.6665
0	23.9408	24.9466		0	1.06828	1.12246		0	98.9996	95.0082
5	23.4475	25.1312		5	1.10184	1.30823		5	98.945	94.2902
10	23.1016	23.8507		10	1.02918	1.23379		10	98.7794	97.5751
15	22.6881	24.5411		15	1.04723	1.10859		15	99.1801	98.112
20	23.0684	24.6291		20	1.04545	1.07512		20	98.8077	98.8079
25	22.676	25.2277		25	1.0468	1.06813		25	99.3741	98.9133

## Sheet: Figure 3- Panel G-I
Figure 3- Panel G				Figure 3- Panel H				Figure 3- Panel I
20200729-LZ1-e1-G2-n3				20200729-LZ1-e1-G2-n3				20200729-LZ1-e1-G2-n3
Perimeter (um)				Elongation ratio				Sphericity (%)
t30-59	Perimeter (um)			t30-59	elongation ratio			t30-59	Sphericity (%)
0	25.0418			0	1.64102			0	47.203
5	24.217			5	1.17417			5	61.1886
10	22.5694			10	1.0934			10	70.4697
15	22.836			15	1.22281			15	52.931
20	23.2387			20	1.19006			20	66.0323
25	23.0126			25	1.26025			25	54.8887
30	23.5784			30	1.20735			30	46.8663
35	24.0181			35	1.46936			35	44.2577
40	23.2368			40	1.43682			40	43.3835
45	24.1844			45	1.59603			45	44.7424
50	29.0216			50	1.81316			50	20.9514
55	28.8305			55	1.65546			55	22.131
60	30.7574			60	2.25118			60	28.5446
65	33.1984			65	2.34761			65	35.0005
70	31.403			70	2.33757			70	34.466
75	31.4602			75	2.62799			75	28.9428
80	29.4571			80	2.93748			80	30.6955
85	28.3613			85	2.82447			85	30.2986
90	26.0877			90	2.21773			90	38.2267
95	26.0378			95	2.09576			95	41.6893
100	22.7699			100	1.80456			100	51.1278
105	20.3128			105	1.55427			105	55.8976
110	20.5328			110	1.46865			110	57.9361
115	19.181			115	1.32205			115	63.6573
120	18.8119			120	1.2507			120	68.5245
125	27.519			125	1.66988			125	44.2068
130	26.6091			130	1.49329			130	55.9948
135	25.1842			135	1.48786			135	56.3932
140	26.0401			140	1.32506			140	57.9468
145	26.2674			145	1.13727			145	55.2815
