# Supplementary material for: Amoeboid-like migration ensures correct horizontal cell layer formation in the developing vertebrate retina
Source: eLife. 2022 May 31;11:e76408. doi: 10.7554/eLife.76408 (PMC9208757; doi:10.7554/eLife.76408)
Supplement: Figure 3—source data 2. [file elife-76408-fig3-data2.xlsx]

## Sheet: Figure 3- figure supplement 1B
Figure 3- figure supplement 1B	Perimeter (um)
	t56 rounding/t67 division	t140/ t148 divides	t60/ t67 divides	t126/ t137 divides	t97/ t104 divides	t48/ t51 divides	t42 here t41	t73/ t77 divides	t60/ t68 divides/ t57 remove so t59/ t67	t18/ t26 divides	t50//t60 divides	t22
time (min)	20170412-eye-2-n1	20170412-eye-2-n3	20170412-eye-2-n5	20170517-LZ2-n2	20170517-LZ2-n10	20180812-G1-n2	20180812-G1-n4	20200123-G1-n1	20200123-G2-n2	20190408-LZ1-G1-n1	20190523-G1-n1	20190523-G1-n10
0		23.963
5		24.6
10		27.197
15		26.392
20		26.426
25		25.693
30		25.801
35		24.235
40		25.339
45		25.407
50		23.081
55		23.293
60		24.57
65		24.596
70		24.421		29.1885
75		23.221		30.3791
80		22.536		29.2552
85		22.778		30.0521
90		23.351		29.7039
95		22.147		33.1321
100		22.214		34.7219
105		23.372		34.2801
110		25.576		33.2528
115		25.337		33.1791
120		24.649		33.3027
125		25.907		36.6242
130		26.592		32.6241
135		26.043		33.4012
140		27.189		34.552
145		26.298		31.3294
150		25.943		29.5905
155		25.523		30.6433
160		25.114		26.4074
165		25.693		26.9591
170		24.093		26.5861
175		24.795		28.3466
180		23.711		27.3197
185		24.489		27.4809
190		24.506		29.0445
195		24.803		28.7227
200		23.388		29.3697
205		28.021		29.5053
210		26.595		32.2139
215		26.545		29.2282	28.988
220		24.902		29.8371	28.6215
225		24.808		30.499	23.7814
230		23.883		27.4248	25.1516
235		23.975		27.6489	28.6174
240		22.878		29.5036	25.3885
245		25.303		32.0322	28.4864
250		26.743		34.8485	28.9793
255		27.083		30.407	25.8066
260		27.327		30.7689	23.0264
265		28.777		30.8713	22.6561
270		27.779		29.3264	26.7896
275		33.729		28.3856	25.8059
280		40.567		26.5434	27.3727
285		43.012		29.3784	26.3632
290		37.639		30.403	28.2035
295		38.492		29.0446	29.4111
300		30.744		32.479	26.0942
305		29.876		30.7752	29.4021
310		29.741		30.5358	26.0982
315		29.147		31.026	28.4473
320		26.544		30.1145	30.3662
325		27.668		30.2892	28.2845
330		27.479		30.6654	29.1664
335		26.9		29.3662	30.9792			39.6915
340		28.955		29.7229	29.4169			37.056
345		31.841		27.2477	30.323			40.3911
350		28.393		25.7204	33.0859			38.804
355		28.325		34.732	34.8732			45.4074
360		30.056		36.7302	28.8962			42.4344
365		30.472		34.6871	31.0787			42.3472
370		29.453		33.711	32.2518			42.6061
375		35.387		37.9917	31.8317			46.6271
380		34.099		31.6738	31.1681			43.2495
385		34.067		29.2632	27.6481			43.4524
390		36.005		33.5628	29.485			45.4841
395		25.464		30.8889	29.5724			50.7948
400		26.519	32.462	29.8145	31.9001			42.8513
405		27.035	27.703	29.685	30.6214			45.068	43.9929
410		27.349	28.356	28.9097	32.7062			39.1916	38.7228
415		28.948	26.358	28.1767	29.9461			45.242	34.1852
420	20.8875	26.745	24.908	27.9117	29.2256			43.3483	41.1397
425	22.1374	28.366	29.196	29.8742	30.9519			37.5986	37.2881
430	21.6226	25.694	29.267	28.696	32.488			53.6041	31.4528
435	25.458	26.197	34.897	38.6196	33.708			55.7904	29.4333
440	23.706	26.298	25.747	39.8078	35.4452			49.367	37.2046
445	23.7633	26.918	31.57	40.7735	34.771			48.7719	32.0464
450	23.4715	25.651	29.964	36.05	36.4047			44.3664	28.9958		33.588
455	22.6623	25.603	29.193	33.7356	36.7689			48.9067	28.4615		29.8187
460	24.1573	25.807	29.656	33.6038	30.7731	28.6775		52.5521	40.4445		31.6904
465	21.9169	25.486	32.756	32.3153	31.0655	27.1425		46.7618	40.1274		29.509
470	24.4715	24.2	28.805	32.4729	28.6859	25.7995		46.2966	40.6259		30.121
475	23.7122		29.015	33.2545	28.0767	28.4873		51.0232	50.0977		27.8722
480	24.6177	25.119	32.017	32.914	27.5398	32.1393		47.018	46.0398		29.3684
485	24.0952	25.368	28.276	31.7411	31.58	28.8784		55.6693	42.5377		27.6631
490	23.0221	24.837	26.515	29.4375	32.4152	28.3778		42.6034	36.8892		31.3316
495	21.114	24.746	28.769	28.0961	31.3881	30.3684	28.1846	39.3363	31.5863		29.5735
500	21.3941	25.084	26.751	29.3717	35.2852	29.5771	30.9042	43.972	37.5034		28.0553
505	20.3984	25.256	27.505	29.2606	34.0053	29.1496	30.7445	41.2594	33.0396		26.2019
510	22.528	25.415	28.826	27.5339	32.0633	28.1211	32.8556	42.2246	30.8674		21.8915
515	27.9547	23.434	29.417	27.0001	29.4754	29.9811	31.5575	52.4467	34.2028		23.3874
520	27.9129	24.424	27.71	27.7913	32.2337	29.1811	33.001	45.3405	28.5533		23.2612
525	23.7976	27.017	31.38	25.8742	29.9017	26.658	31.4583	43.1856	34.8285		24.3098
530	25.5276	26.781	40.259	24.756	29.7277	23.1886	30.7712	39.9588	25.7298		22.2987
535	23.4908	24.896	38.687	25.2	31.6135	20.9377	30.6867	39.5515	23.5168		23.1792
540	28.7281	26.505	32.929	28.7457	28.1749	23.444	29.9612	36.4992	25.378		22.5618
545	27.2829	27.302	33.868	27.828	29.2357	24.6955	27.4293	33.2199	29.1236		22.3506
550	26.9879	29.255	33.024	29.0652	31.6737	26.7108	25.9007	32.2666	28.963		24.6635
555	28.0371	31.402	32.698	27.8207	29.76	30.907	30.7591	44.5476	27.4456		24.0272
560	26.4366	34.411	31.045	27.2879	29.7783	31.7564	31.2879	41.1321	29.2094		22.3618
565	26.8217	32.006	29.494	27.1601	29.2811	25.8538	32.4635	32.1015	34.9447		22.1453
570	26.6474	30.999	28.559	25.3379	31.0774	26.3715	31.2966	29.4844	31.7106		23.6112
575	27.6896	31.617	30.156	24.8454	30.271	26.5706	26.3082	34.8148	29.4614		22.2132
580	29.4558	32.162	29.226	26.2914	28.808	26.6136	25.7636	35.2351	28.7055		23.5287
585	28.1647	31.599	31.15	24.7326	27.8604	24.5447	25.0337	41.66	28.3088		25.8922
590	26.8605	36.67	34.083	25.8765	33.0543	23.4474	23.212	46.0169	27.427		25.4885	30.096
595	26.9501	33.948	31.671	23.2985	28.1003	24.7336	23.343	45.2738	29.7388		27.7029	31.6859
600	25.8305	33.485	30.432	25.661	29.0643	24.782	22.1177	42.9329	31.2845		28.9319	32.2417
605	21.8166	34.192	25.783	27.4394	27.705	22.5017	20.9757	45.4935	30.4213		25.312	31.4925
610	20.1005	32.155	23.177	28.3815	28.2579	23.2092	21.3707	42.0802	32.5883	31.5562	23.6974	28.6973
615	21.4515	32.127	24.269	27.3939	28.2932	24.8123	27.2805	40.2307	30.6041	37.2459	24.148	29.1632
620	18.2167	33.642	27.074	27.5401	27.8762	25.1441	25.773	38.2806	30.7877	31.5942	28.6699	31.3205
625	17.8592	31.599	27.809	26.5571	29.3629	23.0363	26.7231	38.64	29.6186	32.3088	25.7235	29.7413
630	17.4302	29.968	26.134	25.9949	27.5594	22.8427	24.014	37.7337	33.0165	31.0398	26.9925	29.7549
635	16.8713	29.37	26.477	27.6635	28.0021	29.978	24.8482	33.1513	32.1884	31.3535	22.5796	28.3353
640	18.5894	31.784	26.432	29.7868	28.5735	26.7082	26.5585	29.4132	31.8581	33.8423	21.9588	30.987
645	18.8164	36.732	26.04	28.3901	28.464	27.3082	26.2539	30.8717	31.7926	33.6553	20.8354	29.0188
650	19.1034	38.466	26.753	29.0843	27.2104	30.7827	25.9407	32.8599	32.8958	32.7956	22.5094	22.7869
655	19.1855	33.623	24.408	29.0328	27.2311	27.2859	28.8725	30.6118	33.0618	28.9226	22.702	26.3006
660	18.8582	34.024	23.416	26.0772	33.0012	27.7233	24.9566	34.6819	31.9846	29.1926	24.0807	25.5932
665	18.3908	34.238	23.301	24.8743	27.5619	29.1927	22.993	35.1863	29.4232	29.8078	24.3348	27.0409
670	18.9752	33.181	23.581	25.5417	27.8859	27.832	25.3325	34.4165	31.0257	42.0731	23.68	25.6013
675	17.9639	27.417	22.839	24.9492	28.3502	26.4575	32.2701	32.6492	31.4842	34.5104	23.2492	26.8301
680	19.066	27.938	22.458	25.056	27.1346	23.6208	28.2697	33.6735	31.2995	33.0102	21.7975	26.0312
685	18.6535	28.107	22.875	23.4614	25.4247	21.1111	26.1142	30.1776	27.8724	26.5214	21.6636	24.3093
690	19.23	26.555	23.299	23.9942	23.856	20.8521	21.8323	28.4132	26.7336	23.9408	21.533	25.3474
695 (time rounding)	18.5835	24.054	23.177	24.1789	23.98	20.9423	19.8366	26.0087	24.8771	23.4475	21.4801	24.77
700	19.2735	22.99	23.23	23.2464	24.0919	21.0341	20.6422	25.1128	24.4906	23.1016	21.1354	25.2983
705	19.1106	22.649	23.387	22.9155	23.7272	20.2325	19.8019	25.0708	24.4941	22.6881	21.2996	24.227
710	19.423	23.589	23.402	22.415	23.924	22.5169	19.8278	25.9816	24.7551	23.0684	21.3617	24.3097
715	19.3762	23.614	23.418	23.0694	23.9243		20.3071		24.7535	22.676	20.9584	24.0737
720	19.4927	23.218	23.436	22.5766	24.4051		20.4453		24.4286	23.1334	20.6417	23.661
725	19.8151	23.652	22.755	22.3724	24.3183				23.9058	23.7784	21.0703	25.1827
730	19.3288	23.597	22.27	22.6086	26.8188				23.9893	23.2034	21.2009	24.0001
735	19.4524	27.163		22.8264						30.6298	20.3658	23.4717
740	19.6565			22.3908							20.9034	22.6503
745	20.1615			22.3544
750	20.6819
755
760
765
770

## Sheet: Figure 3- figure supplement  1C
Figure 3- figure supplement 1C	elongation ratio
time (min)	20170412-eye-2-n1	20170412-eye-2-n3	20170412-eye-2-n5	20170517-LZ2-n2	20170517-LZ2-n10	20180812-G1-n2	20180812-G1-n4	20200123-G1-n1	20200123-G2-n2	20190408-LZ1-G1-n1	20190523-G1-n1	20190523-G1-n10	20200729-LZ1-e1-G2-n3
0		1.4962											1.64102
5		1.4489											1.17417
10		1.5673											1.0934
15		1.6044											1.22281
20		1.3933											1.19006
25		1.3484											1.26025
30		1.2227											1.20735
35		1.1379											1.46936
40		1.1646											1.43682
45		1.4537											1.59603
50		1.3139											1.81316
55		1.4635											1.65546
60		1.6452											2.25118
65		1.8547											2.34761
70		1.7971		2.95107									2.33757
75		1.6526		3.1694									2.62799
80		1.4285		2.73685									2.93748
85		1.5712		2.97363									2.82447
90		1.5973		2.97352									2.21773
95		1.4829		3.26256									2.09576
100		1.454		3.21012									1.80456
105		1.5492		3.05711									1.55427
110		1.7638		2.87831									1.46865
115		1.7531		2.94138									1.32205
120		1.7391		3.09147									1.2507
125		1.888		3.53681									1.66988
130		1.9509		2.75379									1.49329
135		1.9104		2.59152									1.48786
140		1.7199		2.10931									1.32506
145		1.8355		1.78217									1.13727
150		1.7899		1.71243
155		1.6914		1.79267
160		1.7634		1.35322
165		1.595		1.2163
170		1.5405		1.36187
175		1.4913		1.46251
180		1.3604		1.33589
185		1.478		1.14704
190		1.7954		1.26162
195		1.6301		1.40879
200		1.4501		1.33134
205		1.2991		1.33735
210		1.485		1.55277
215		1.8785		1.58752	2.58462
220		1.8067		1.65664	2.52966
225		1.6374		1.77431	1.85694
230		1.4511		1.68993	1.96517
235		1.2372		1.65716	2.02586
240		1.3686		2.00985	1.65481
245		1.6878		2.13212	2.08026
250		1.7113		2.37293	2.23062
255		1.7521		2.05316	1.97562
260		1.9377		1.90972	1.55078
265		1.8051		1.83189	1.42634
270		1.7081		1.85061	1.86965
275		2.3963		1.6541	1.75296
280		2.9063		1.46903	1.88283
285		3.323		1.46432	1.96926
290		3.2895		1.66459	2.09899
295		2.5926		1.61147	2.02074
300		2.1369		2.24763	1.52862
305		2.1822		1.77597	1.62163
310		1.8557		1.68237	1.49639
315		1.7011		1.97284	1.84006
320		1.8233		2.08576	2.26858
325		2.0303		2.25944	2.11896
330		1.8147		2.09565	1.99397
335		1.817		2.15004	2.26635			2.64138
340		1.9616		2.19908	2.03429			2.23045
345		2.1284		1.96381	2.46664			2.39875
350		1.8085		2.05933	2.43308			2.442
355		1.8763		2.86444	2.34957			3.05818
360		2.1261		2.60966	1.97403			2.65613
365		2.2459		2.34368	2.10064			2.70597
370		2.2671		2.12089	2.40798			2.62703
375		2.078		2.49931	2.3367			3.50836
380		2.0505		2.26658	2.27654			3.5591
385		1.9375		1.85699	2.22964			3.43441
390		2.0198		1.95419	2.15683			3.68719
395		1.5584		1.47155	2.22742			4.07527
400		1.5887	2.3194	1.42898	2.34863			3.21842
405		1.5052	2.1122	1.2546	2.60348			3.36853	2.51836
410		1.5339	2.0869	1.70368	2.90982			2.69826	2.30792
415		1.5656	1.782	1.62158	2.83301			3.2638	2.62945
420	1.83302	1.6045	1.7999	1.52249	2.76048			4.06031	3.61033
425	1.69397	1.3338	2.1293	1.81078	2.88849			3.54937	3.42293
430	1.82562	1.4069	2.0454	1.84472	3.0578			4.34351	2.47089
435	2.11405	1.2616	2.4546	2.51237	2.83138			4.68665	2.0081
440	1.83424	1.2413	1.4758	2.7111	2.82572			4.3153	1.96452
445	1.99868	1.099	1.5296	3.06708	2.76832			4.23441	1.67015
450	1.80803	1.0466	1.7246	2.73713	3.05862			3.30466	1.48407		2.42082
455	1.79309	1.194	1.6439	2.16624	3.19517			3.71735	1.69582		2.52923
460	2.06274	1.2888	1.7223	1.95747	2.45863	3.48934		4.78627	2.26786		2.67791
465	1.64678	1.39	2.0812	1.67757	2.30948	2.99634		4.92531	2.62603		2.52724
470	1.70937	1.4548	1.4363	1.56327	2.03041	2.44615		4.75889	2.18035		2.49659
475	1.72565	1.4446	1.1704	2.07921	1.89712	3.4004		4.31287	2.69371		2.31607
480	2.20432	1.3884	1.0834	2.33966	1.84791	3.64458		4.13115	2.68743		2.7752
485	1.90345	1.5067	1.1463	2.02907	2.46477	3.38859		4.21371	2.60767		2.49966
490	1.9078	1.3217	1.1267	1.71777	2.6995	3.64486		2.97762	2.04914		2.90474
495	1.81832	1.3364	1.4102	1.64705	2.53297	3.79101	3.14253	2.88893	1.7711		2.6835
500	1.64456	1.2381	1.0569	1.81052	2.9025	3.72088	3.47421	3.20267	2.21932		2.21201
505	1.49584	1.2265	1.1264	2.03521	2.87854	3.35358	3.48047	3.04449	1.77248		2.00825
510	1.65791	1.2525	1.5668	2.07998	2.29011	3.54292	3.86578	2.78797	1.80522		1.7165
515	1.65964	1.2448	1.5388	1.9825	2.0892	4.14916	3.72226	3.43456	1.69177		1.91334
520	1.65886	1.3113	1.6133	1.77369	2.25731	3.35803	4.05164	3.23805	1.68973		1.75758
525	1.43159	1.3363	1.8244	1.58341	2.0733	2.60553	3.83787	3.19097	2.13185		2.07266
530	1.66741	1.1158	2.5668	1.33338	2.05616	2.29421	3.82143	2.50331	1.40812		1.58566
535	1.91352	1.2152	2.6727	1.55016	2.36354	2.18003	3.51036	2.29114	1.35676		1.49452
540	2.58148	1.0557	2.1257	1.57659	1.62706	2.46281	3.20033	2.4294	1.57276		1.6102
545	2.57337	1.1262	2.3632	1.65337	1.74475	2.6919	2.90104	2.25707	1.8315		1.64447
550	2.54151	1.2023	1.8896	1.75424	2.14895	3.10341	2.42709	2.05215	2.11478		2.2175
555	2.73798	1.5024	2.2649	1.54559	2.55075	3.75552	3.46928	3.58044	1.75623		1.9999
560	2.59434	1.9994	2.1105	1.51557	2.35607	3.44192	2.71295	3.1509	2.02454		1.44668
565	2.62949	1.554	1.7972	1.39674	1.99161	2.30238	2.1207	2.06556	2.60134		1.34089
570	2.59155	1.5376	1.5599	1.44976	2.36931	2.79272	2.18669	1.90138	1.87857		1.7563
575	2.5695	1.6261	1.7853	1.43582	2.10256	3.30022	2.1186	1.19216	1.55663		1.69314
580	2.70014	1.5319	1.7248	1.49062	1.76202	2.78984	1.88229	1.51981	1.41767		1.55782
585	2.35903	1.4811	1.4088	1.30748	1.62109	2.72797	1.71324	1.70393	1.26861		1.60599
590	2.08959	1.4294	1.5919	1.23504	2.00858	2.34041	1.49336	2.09737	1.10233		1.99039	1.5795
595	2.13643	1.421	1.7655	1.17232	1.59288	2.61248	1.80261	2.88299	1.50462		2.08972	2.09421
600	1.83873	1.3308	1.8529	1.46838	1.35761	2.71503	1.8876	3.21102	1.84273		2.07574	2.08044
605	1.58226	1.3755	1.4477	1.38717	1.31276	2.14556	1.7642	4.00953	1.88323		1.6946	1.93627
610	1.37975	1.2781	1.4257	1.40547	1.4543	2.07578	1.57085	3.3188	1.80494	2.17779	1.52994	1.62377
615	1.69988	1.3215	1.6121	1.39572	1.91692	2.17807	2.43461	2.95241	1.43494	2.95467	1.61873	1.57581
620	1.36749	1.3331	1.7607	1.311	1.9822	2.19115	2.7195	3.35827	1.44142	2.21235	2.00914	1.75201
625	1.51885	1.3873	1.4778	1.2668	1.83357	1.82159	1.83385	2.66598	1.34591	2.63241	1.90537	1.90627
630	1.48615	1.3262	1.5233	1.33311	1.69258	1.92434	1.58027	2.05334	1.80641	2.54271	1.44696	1.99144
635	1.36617	1.3992	1.4059	1.495	1.55307	2.94805	1.12909	1.51625	1.81516	2.18727	1.54274	1.52334
640	1.4264	1.6339	1.3865	1.6939	1.57377	2.40973	1.10793	1.61781	2.14512	2.72293	1.58651	1.4138
645	1.28796	1.7946	1.2248	1.69666	1.68946	2.3005	1.36322	1.883	2.11387	3.14511	1.18675	1.54338
650	1.33726	2.1175	1.2624	1.87162	1.83136	2.83496	1.19158	1.93668	2.13717	2.35013	1.09805	1.21589
655	1.1989	1.9312	1.3901	1.94247	1.59725	2.55414	1.52394	1.80788	1.35938	2.06696	1.28436	1.04215
660	1.18226	1.9938	1.4706	1.56548	1.99085	2.46293	1.85328	1.17938	1.18196	1.96496	1.28349	1.20314
665	1.14929	1.8638	1.4467	1.3516	1.59143	2.71503	1.59213	1.38598	1.32481	2.26464	1.26458	1.316
670	1.36021	1.7322	1.372	1.48106	1.5157	2.79888	1.57042	1.71676	1.32865	3.30034	1.33058	1.38265
675	1.12827	1.5421	1.2987	1.30682	1.47596	2.53724	2.21868	1.77905	1.43119	2.41624	1.28135	1.3815
680	1.16822	1.4127	1.3019	1.28572	1.52837	1.69779	2.38859	1.80946	1.58816	2.4198	1.12485	1.33741
685	1.1178	1.2366	1.0513	1.22239	1.47742	1.22783	1.99243	1.54033	1.39803	1.50406	1.26798	1.11966
690	1.26654	1.0984	1.043	1.15715	1.21019	1.02414	2.01281	1.32913	1.27124	1.06828	1.14362	1.15965
695 (time rounding)	1.1256	1.0865	1.0829	1.07527	1.18903	1.16293	1.05001	1.14926	1.17536	1.10184	1.13479	1.0933
700	1.04584	1.0578	1.1282	1.09291	1.21507	1.06608	1.12009	1.13988	1.21464	1.02918	1.06992	1.09675
705	1.09422	1.0673	1.1087	1.1076	1.1582	1.10468	1.09757	1.18529	1.19982	1.04723	1.10771	1.03339
710	1.0969	1.0726	1.0149	1.03341	1.14497	1.53122	1.04602	1.1588	1.052	1.04545	1.07351	1.08154
715	1.05886	1.0227	1.0289	1.08615	1.14379		1.02297		1.11152	1.0468	1.02729	1.04527
720	1.09517	1.0464	1.0478	1.05532	1.08223		1.02627		1.07852	1.01058	1.03023	1.02894
725	1.03652	1.038	1.0517	1.04378	1.1213				1.12727	1.0178	1.01937	1.04585
730	1.11797	1.0951	1.2331	1.12058	1.60013				1.1464	1.02799	1.03367	1.00522
735	1.13319	1.5026		1.0534						1.84198	1.00324	1.01082
740	1.09226			1.04543							1.36374	1.0104
745	1.07174			1.0572								1.04527
750	1.40039			1.66118								1.02894
												1.04585
												1.00522
												1.01082
												1.0104

## Sheet: Figure 3- figure supplement 1D
igure 3- figure supplement 1D	Sphericity
time (min)	20170412-eye-2-n1	20170412-eye-2-n3	20170412-eye-2-n5	20170517-LZ2-n2	20170517-LZ2-n10	20180812-G1-n2	20180812-G1-n4	20200123-G1-n1	20200123-G2-n2	20190408-LZ1-G1-n1	20190523-G1-n1	20190523-G1-n10
0				79.5991
5				82.4711
10				79.6928
15				80.0474
20				72.9442
25				70.0339
30				74.532
35				77.7384
40				79.9166
45				77.9458
50				73.3741
55				78.9241
60				76.2039
65				75.2192
70				83.1177
75				86.1265
80				85.2255
85				96.4594
90				93.8369
95				94.4173
100				92.9924
105				97.3057
110				95.8536
115				92.0581
120				92.4453
125				93.7402
130				94.6353
135				86.9337
140				92.3375	80.8233
145				89.1167	81.7599
150				88.8887	90.2999
155				91.7208	88.5179
160				91.9645	87.1416
165				88.6669	92.6679
170				84.5204	90.1636
175				81.032	87.6757
180				88.9379	90.105
185				88.7567	94.3182
190				89.2579	96.6249
195				88.4064	91.1734
200				92.0704	92.8588
205				93.4027	89.3295
210				88.3578	88.5504
215				87.8231	86.6503
220				92.2903	86.4324
225				87.1229	95.5174
230				91.5491	90.8127
235				91.615	95.4524
240				90.4132	89.5649
245				87.5539	87.0535
250				87.5208	86.5683
255				86.5887	88.6737
260				87.2444	88.4644			75.9636
265				84.122	89.7361			78.4707
270				89.0211	85.1658			73.5477
275				89.5232	84.0907			77.1825
280				78.733	80.5396			67.9843
285				83.9984	89.0399			72.6418
290				84.3105	88.2969			72.6987
295				87.1342	85.7142			72.0988
300				78.3986	85.4144			66.553
305				87.6719	86.1596			65.6773
310				91.2859	87.9519			67.9503
315				87.752	86.6093			67.1153
320				96.2473	86.7877			61.2893
325				94.4207	85.8165			69.9869
330				96.4898	83.2902			66.2627	69.5444
335				92.1463	80.1764			75.6651	73.5119
340				95.0675	81.6977			66.4919	78.7452
345	91.9811			95.7059	83.0889			67.6259	72.3365
350	89.4895			91.3139	81.0574			72.0725	74.4791
355	90.3059			90.7452	81.6547			58.3971	84.3121
360	84.6532			77.8775	80.4982			56.3455	88.5795
365	88.1326			78.5018	79.7501			59.6312	76.2829
370	86.8208			78.6288	81.8961			60.4069	86.3114
375	88.3402			82.8047	76.1809			66.6953	92.5946		83.915
380	91.8787			85.0063	74.8601			60.2044	91.2542		81.8809
385	87.9073			86.5422	84.7636	73.3735		58.4642	76.3128		80.7579
390	93.8805			90.9669	86.168	77.6091		62.3736	78.147		84.5549
395	90.4332			94.7811	87.6656	83.4142		65.3605	75.7099		82.1249
400	89.0991			88.6662	90.2173	76.2643		63.8622	67.4518		85.1526
405	88.3137			84.8703	91.5272	71.8209		62.6852	67.9438		81.9987
410	89.946			88.9284	83.7076	76.9409		57.5531	72.8989		83.5921
415	91.4991			93.6661	81.5508	73.067		67.8755	79.7061		79.4178
420	92.4814			93.7547	83.7827	74.3498	78.4402	74.1629	91.0001		82.8545
425	93.486			92.135	78.8996	74.5207	73.927	70.3815	76.3698		85.7734
430	95.3121			89.5962	82.4747	76.1998	74.5447	72.2952	82.7282		89.4423
435	90.7291			89.8501	85.2674	77.2307	73.2262	73.0559	89.0398		93.7131
440	78.8725			91.0339	88.7728	73.9136	71.7556	61.8453	83.1202		90.9479
445	78.6962			91.679	83.9921	77.7481	69.4041	71.7728	88.0258		92.2566
450	84.4574			94.6588	84.7109	79.8638	71.5654	73.6513	78.4972		88.888
455	81.6584			96.2133	87.7233	86.9926	73.0922	79.5038	95.0326		92.7906
460	82.0059			93.5274	84.0308	88.2195	74.4275	81.374	97.0791		95.2868
465	70.2749			90.6104	92.0645	84.0761	77.7518	80.622	94.04		94.0536
470	76.4914			90.3448	87.3701	82.9284	81.0865	82.8855	86.5143		92.437
475	79.8259			89.9392	85.266	75.1543	84.5787	84.4551	86.6383		87.8131
480	75.5767			90.4391	83.5298	69.6049	74.0415	66.959	91.7787		91.2383
485	78.8507			89.2368	84.0097	67.9833	76.8079	69.2944	88.8949		96.3661
490	78.5375			90.1277	86.8383	79.399	78.9995	81.5877	82.4604		96.6357
495	79.4598			93.9223	81.5063	77.5361	78.771	85.6414	89.3456		88.8033
500	80.6173			93.6761	83.9556	75.7047	83.8087	82.1115	92.4752		92.7293
505	76.5543			92.542	87.9045	76.5586	85.0869	81.8488	93.0143		92.4242
510	79.9344			96.2767	89.32	81.486	86.604	77.3198	94.6826		91.0726
515	84.546			96.3974	82.4195	83.4213	92.2177	68.5272	92.6871		89.9246	92.0032
520	83.9691			98.8597	92.3542	80.3973	90.6417	69.0567	85.5047		86.7363	87.9441
525	86.9313			95.6541	94.4372	78.5552	86.904	73.7044	85.5943		89.0892	86.3805
530	91.6001			96.3164	95.0332	87.4856	92.7295	69.6519	90.3041		93.3743	90.2164
535	94.4266			95.1781	92.3752	87.1605	92.5833	70.3049	89.0643	83.3907	96.328	94.1792
540	90.3174			95.3578	91.2079	84.7086	78.6897	71.0875	92.7153	74.302	93.5583	94.8931
545	96.3891			95.874	91.4462	82.2744	83.7957	71.6984	90.9284	86.1412	91.306	92.7729
550	95.5006			96.9064	90.3453	88.0613	86.3774	72.7053	91.1026	81.7017	91.6344	91.6392
555	95.8401			96.8413	93.1268	87.8808	89.01	76.3973	87.4575	83.7589	94.5663	91.0435
560	97.6057			94.9726	93.1517	77.0701	91.4803	83.2461	88.2652	86.0116	95.4368	95.2711
565	96.4001			91.4809	93.1444	86.8777	93.7732	85.7089	87.0367	79.0663	95.9477	87.3218
570	97.4534			93.0254	93.024	83.5828	91.3002	86.5716	85.6543	76.0757	98.7123	87.5881
575	96.083			92.459	91.8653	74.9399	91.553	87.0883	87.5419	76.8898	98.6352	97.2231
580	97.7039			91.9679	94.8356	81.4858	84.3626	87.1798	84.4498	83.73	98.2625	96.4168
585	96.9993			95.7817	83.7319	81.6794	89.8579	86.4393	91.061	85.1323	97.7734	97.0237
590	95.68			96.8318	92.8625	77.8165	93.4959	86.7094	95.6264	84.5807	96.9012	97.1973
595	96.4014			96.6238	94.484	81.5169	91.7072	86.6359	93.9521	66.0853	96.9495	95.676
600	98.2135			96.5955	94.853	83.6732	76.4979	84.5646	93.3149	80.5673	96.891	96.5293
605	96.927			97.7228	94.2539	92.3922	79.8953	84.4446	89.5992	83.7572	98.7703	96.5384
610	98.7838			97.9298	94.8427	98.5173	83.6282	88.0042	95.7481	95.6339	98.8304	98.516
615	97.5688			98.7202	98.6209	98.3289	90.3209	91.5497	96.2778	98.9996	99.1985	99.4435
620 (rounding)	99.0118			99.6168	98.5469	99.0471	98.9866	97.4273	97.92	98.945	99.1637	99.7267
625	99.2389			99.6935	98.665	99.1783	99.2513	97.1701	97.6542	98.7794	99.0614	99.369
630	99.2722			99.5738	99.2151	99.3801	99.1181	96.9938	97.964	99.1801	99.533	99.2904
635	99.2681			99.555	99.0677	93.4483	99.494	97.5554	98.2596	98.8077	100	99.1712
640	99.464			99.3766	99.3273		100		98.7236	99.3741	99.8491	99.8493
645	99.4801			99.7194	99.4453		100		98.5209	98.7346	99.5886	99.2008
650	99.1366			99.3819	99.4654				98.2756	99.228	100	99.454
655	98.955			99.4166	95.3157				97.8415	98.9332	99.9487	99.5249
660	98.4586			99.7726						87.1098	99.2944	99.1851
665	98.9525			99.9582							97.2942	99.369
670	97.8884			99.5942
675	95.4656			94.2059
680
685
690
695
700
705
710
715
720
725
730
735
740
745
750
755
760
765
770
