# Supplementary material for: Amoeboid-like migration ensures correct horizontal cell layer formation in the developing vertebrate retina
Source: eLife. 2022 May 31;11:e76408. doi: 10.7554/eLife.76408 (PMC9208757; doi:10.7554/eLife.76408)
Supplement: Figure 3—source data 3. [file elife-76408-fig3-data3.xlsx]

## Sheet: Figure 3- figure supplement 2B
Figure 3- figure supplement 2B
	1st cell-X movement (micron)	1st cell-Y movement (micron)		2nd cell-X movement (micron)	2nd cell-Y movement (micron)
	-2	-36		8	-20
	-3	-36		8	-20
	-3	-38		6	-24
	-3	-40		7	-25
	-3	-41		7	-26
	-3	-40		8	-25
	-3	-41		8	-25
	-3	-41		8	-25
	-3	-41		8	-25
	-3	-42		8	-26
	-5	-43		8	-27
	-4	-43		6	-29
	-3	-43		5	-32
	-3	-43		5	-32
	-3	-44		6	-30
	-3	-43		6	-29
	-3	-44		6	-28
	-5	-44		6	-27
	-4	-44		5	-28
	-5	-45		4	-28
	-4	-43		3	-29
	-4	-44		3	-30
	-4	-43		2	-30
	-3	-43		1	-30
	-4	-45		1	-31
	-3	-44		1	-33
	-3	-44		2	-32
	-3	-45		3	-32
	-3	-44		2	-34
	-3	-44		2	-34
	-2	-43		1	-33
	0	-44		1	-33
	3	-45		2	-34
	3	-44		4	-34
	3	-44		3	-33
	4	-42		3	-32
	5	-40		4	-31
	6	-40		5	-28
	6	-40		7	-30
	4	-40		6	-31
	4	-40		6	-32
	4	-41		5	-31
	5	-40		4	-32
	5	-39		3	-32
	3	-38		4	-31
	4	-38		4	-30
	3	-38		4	-31
	4	-37		3	-32
	5	-39		1	-33
	5	-39		1	-34
	5	-40		1	-33
	5	-39		2	-33
	4	-39		2	-33
	4	-39		2	-33
	4	-39		2	-32
	4	-40		2	-31
	4	-39		2	-31
	4	-39		1	-30
	4	-39		0	-29
	2	-39		-1	-27
	3	-39		-3	-27
	3	-38		-2	-24
	5	-38		-1	-21
	5	-39		2	-20
	6	-38		3	-19
	6	-37		5	-18
	4	-37		7	-14
	4	-37		6	-13
	4	-36		7	-13
	5	-36		8	-11
	6	-34		8	-10
	7	-33		10	-9
	7	-32		10	-9
	7	-32		12	-9
	9	-31		13	-10
	10	-30		15	-11
	9	-28		16	-11
	9	-26		16	-11
	9	-24		14	-12
	9	-23		9	-10
	11	-21		8	-9
	13	-19		8	-9
				9	-9

## Sheet: Figure 3- figure supplement  2D
Figure 3- figure supplement 2D	20180730-G1-part-1-n1
	lateral movement (micron)	radial movement (micron)
	-8.101	-27.319
	-6.989	-25.096
	-8.419	-27.955
	-8.419	-27.16
	-7.783	-29.702
	-7.783	-29.702
	-6.672	-27.319
	-6.354	-25.572
	-4.766	-28.113
	-1.589	-28.431
	-0.795	-28.272
	0.158	-28.431
	0	-28.908
	0.476	-27.478
	1.588	-27.478
	1.747	-23.825
	2.541	-20.807
	2.382	-17.948
	1.906	-17.313
	2.382	-14.136
	3.335	-14.613
	4.129	-14.613
	4.447	-14.136
	3.97	-14.613
	3.653	-15.089
	2.541	-15.089
	2.541	-16.042
	1.747	-15.883
	1.747	-15.883
	1.429	-15.724
	1.111	-14.771
	-0.318	-14.454
	-0.159	-15.566
