# Supplementary material for: Amoeboid-like migration ensures correct horizontal cell layer formation in the developing vertebrate retina
Source: eLife. 2022 May 31;11:e76408. doi: 10.7554/eLife.76408 (PMC9208757; doi:10.7554/eLife.76408)
Supplement: Figure 4—source data 1. [file elife-76408-fig4-data1.xlsx]

## Sheet: Figure 4C
Figure 4C-C''
			protrusions
	HC centroid		1		2		3		4		5		6		7		8		9		10		11		12		13		14		15			16		17		18		19		20		21		22		23
time (min)	x [micron]	y [micron]	x [micron]	y [micron]	x [micron]	y [micron]	x [micron]	y [micron]	x [micron]	y [micron]	x [micron]	y [micron]	x [micron]	y [micron]	x [micron]	y [micron]	x [micron]	y [micron]	x [micron]	y [micron]	x [micron]	y [micron]	x [micron]	y [micron]	x [micron]	y [micron]	x [micron]	y [micron]	x [micron]	y [micron]	x [micron]	x [micron]		x [micron]	y [micron]	x [micron]	y [micron]	x [micron]	y [micron]	x [micron]	y [micron]	x [micron]	y [micron]	x [micron]	y [micron]	x [micron]	y [micron]	x [micron]	y [micron]
0	105.39	115.12	109.141	123.444	111.721	109.259			105.156	124.147	100.701	122.506	98.942	125.671	107.617	106.914	101.17	103.28	99.763	107.5
1	105.859	114.3	110.548	124.968	114.534	99.177			105.976	127.664	101.873	121.568	99.646	121.216	107.149	107.031	101.99	100.232	101.287	105.859
2	105.859	116.175	108.438	119.458	112.541	103.514			105.156	125.202	102.928	124.85	101.053	117.934	106.68	111.369	102.459	106.797
3	106.328	114.065			113.596	103.397			106.562	122.74	104.335	120.044	102.577	118.754	107.969	109.376	101.287	103.397
4	105.625	116.058			110.783	108.321			104.569	125.202			101.287	116.761			100.935	104.335			100.818	104.335
5	105.859	115.589			110.431	109.728			105.156	124.499			102.811	115.706			103.045	106.445			101.053	104.218
6	106.562	116.058			109.845	109.845			105.742	121.92							103.397	107.617			101.756	103.28	111.017	118.52
7	106.093	117.465			109.61	111.955			105.507	126.492							104.218	105.39			102.928	106.093	110.431	119.575
8	105.625	116.175			109.728	112.189			104.687	127.898							104.687	96.715			101.99	106.68	109.962	116.761
9	105.976	116.292			111.252	111.486			106.445	123.209							104.687	103.749			102.459	102.694	110.431	114.886
10	106.797	116.175							106.445	123.326							107.969	98.122			104.218	106.914	111.017	119.34
11	106.445	115.941							106.562	125.788							104.687	107.266			103.632	107.031	109.962	118.168	110.197	106.797
12	105.39	118.52															102.928	109.728			101.873	110.197			107.031	107.031
13	103.983	118.403															101.521	111.017			100.935	112.307			105.976	108.086	107.383	112.776
14	104.452	119.575															103.045	110.783									111.486	112.189	102.928	110.665
15	103.866	118.872															103.397	104.687									107.266	113.244	99.411	108.79
16	103.866	118.52															105.273	105.742											99.997	112.541
17	103.983	117.699															105.39	104.218											99.997	102.225
18	104.101	119.458															104.218	102.225											100.466	101.639
19	104.101	120.161															103.749	104.335											98.473	106.562
20	103.983	120.396															102.811	111.955											97.653	109.728
21	103.749	118.872															102.811	112.424											99.294	110.431
22	104.101	118.872															105.273	107.617													101.287	114.768
23	104.101	118.754															105.625	106.093													100.466	113.713
24	103.866	119.575																													99.177	110.9		103.983	112.541
25	103.983	120.982																													100.701	117.23		104.569	110.783
26	104.101	121.099																																104.687	107.5
27	103.983	121.099																																107.031	106.445			100.818	115.003					100.818	114.886
28	103.983	121.333																																105.742	111.838			102.577	111.486					100.466	117.816
29	104.101	122.037																																105.273	112.072	103.28	128.953	102.342	105.038					98.708	108.907
30	103.28	121.802					109.024	108.204																										104.569	113.713	101.99	134.111	101.99	109.376					100.349	116.996
31	103.28	121.099					109.259	103.866																										105.273	111.252	103.632	135.635	98.708	105.038					99.529	116.292
32	102.459	121.333					109.024	105.156																										104.687	111.369	101.521	130.36	99.529	107.5
33	102.459	119.575					108.204	111.369																										103.397	112.893	101.99	134.463	99.88	109.61			107.149	114.182
34	102.108	120.513					107.735	110.9																										103.28	112.658	100.232	131.298	98.473	108.321			102.811	115.589
35	101.404	119.809					108.086	108.907																										102.459	111.838	96.715	134.346	97.653	109.61
36	100.466	120.396					108.79	107.383																												99.88	137.042	97.77	111.252
37	100.349	120.513					108.907	108.555																												95.66	133.056	97.887	112.893
38	99.529	120.63					110.314	106.797																												98.591	130.829	97.536	108.673	104.335	114.417
39	99.411	119.34					109.024	109.493																												95.66	131.767	94.957	108.086	104.101	114.065					99.997	109.962
40	98.708	119.34					108.438	106.68																												97.067	130.829	95.894	112.893	103.632	115.003					99.529	112.776	99.529	112.893
41	97.887	119.34					107.5	111.955																																						98.473	111.955	103.632	111.838
42	98.708	119.34					107.383	108.673																																								100.935	114.886
43	98.825	119.34					107.735	110.665																																								103.749	111.486
44	98.825	119.34					107.617	111.369																																								101.053	113.01
45	98.825	118.52					107.266	110.431																																								99.88	112.541
46	99.411	118.872					107.5	112.189																																								102.342	112.658
47	98.942	117.465					107.617	109.024																																								104.804	105.507
48	98.005	117.934					107.617	109.962																																								101.17	110.548
49	97.653	118.989					111.017	108.907																																								105.273	99.88
50	98.708	118.989					107.735	109.962																																								103.866	106.914
51	99.529	118.637																																														103.632	106.093
52	99.294	118.52																																														103.866	107.149
53	99.646	118.52																																														103.28	110.665
54	100.349	118.168
55	100.349	118.989
56	100.349	118.989
57	100.584	119.223
58	100.584	119.223
59	100.584	119.223
60	100.584	119.223
61	100.701	119.223
62	100.701	119.223
63	102.225	119.809
64	100.232	120.161
65	101.404	120.513
66	101.17	120.278
67	100.349	120.513
68	101.404	120.747
69	101.404	120.747
70	100.584	120.747
71	99.646	121.333
72	99.646	121.333
73	99.646	121.802
74	99.294	121.92
75	99.294	122.271
76	99.294	122.271
77	98.591	122.623
78	98.473	122.154
79	98.356	122.271
80	97.77	122.623
81	98.122	123.092
82	98.356	123.092
83	98.356	123.092
84	97.77	122.975
85	97.77	122.857
86	97.77	122.857
87	97.77	122.388
88	97.77	122.388
89	96.715	121.216
90	96.598	121.92
91	96.715	123.092
92	96.832	123.092
93	96.832	123.092
94	96.832	122.623
95	96.832	122.623
96	96.949	122.388
97	96.949	122.388
98	96.949	122.388
99	96.949	122.388
100	96.715	119.809
101	95.894	119.34
102	95.894	119.809
103	95.894	119.809
104	95.894	119.809
105	96.012	120.982
106	96.832	119.927
107	96.949	119.692
108	96.949	119.34
109	96.832	120.044
110	96.832	118.872
111	96.832	116.41
112	96.832	116.058
113	96.832	116.058
114	96.832	115.472
115	96.832	115.12
116	95.777	116.175
117	96.129	113.948
118	96.715	114.651
119	96.715	114.651
120	97.301	112.776
121	97.418	113.831
122	97.184	114.651
123	96.832	111.721
124	96.715	113.596
125	95.425	114.534
126	94.488	115.472
127	94.839	113.831
128	94.605	113.831
129	94.136	113.596
130	94.019	112.189
131	93.55	111.838
132	92.964	110.665
133	92.026	111.486
134	93.784	111.721
135	94.136	109.376
136	94.253	110.783
137	94.722	109.845
138	94.253	109.962
139	94.253	109.728
140	94.37	109.728
141	94.37	109.728
142	94.957	110.197
143	94.488	108.907
144	94.253	107.383
145	94.839	108.555
146	94.605	107.735
147	94.605	107.266
148	94.839	100.584
149	95.894	98.473
150	98.122	98.825
151	98.122	98.239
152	96.715	99.294
153	96.481	97.536
154	96.246	96.949
155	97.77	96.832
156	97.77	96.832
157	98.591	99.177
158	96.715	99.763
159	97.184	99.06
160	98.708	99.997
161	98.708	99.997
162	98.708	99.997
163	98.122	99.177
164	98.825	98.122
165	99.646	98.708
166	99.529	101.639
167	99.411	103.514
168	99.411	103.163
169	99.646	102.577
170	99.06	104.804
171	99.06	104.921
172	98.356	104.804
173	98.591	103.983
174	99.294	103.163
175	99.763	104.335
176	99.88	105.507
177	101.17	106.211
178	99.646	105.156
179	100.466	103.514
180	101.053	104.687
181	101.287	103.632
182	100.935	104.569
183	100.466	103.514
184	101.17	104.335
185	102.108	104.218
186	101.404	104.335
187	101.873	102.811
188	101.404	100.701
189	100.818	99.06
190	102.459	96.949
191	102.459	95.894
192	101.521	93.198
193	102.225	92.495
194	102.342	92.26
[truncated: 229 more columns]

## Sheet: Fig 4-fig supp 1F-I_cell-1
Figure 4-figure supplement 1F-I'_cell-1				cell-1 (panel F'-I')	centroid		PROTRUSION-1		PROTRUSION-2		PROTRUSION-3		PROTRUSION-4		PROTRUSION-5		PROTRUSION-6		PROTRUSION-7		PROTRUSION-8		PROTRUSION-9		PROTRUSION-10		PROTRUSION-11		PROTRUSION-12		PROTRUSION-13		PROTRUSION-14		PROTRUSION-15		PROTRUSION-16		PROTRUSION-17		PROTRUSION-18		PROTRUSION-19		PROTRUSION-20		PROTRUSION-21		PROTRUSION-22
				time (min)	x [micron]	y [micron]	x [micron]	y [micron]	x [micron]	y [micron]	x [micron]	y [micron]	x [micron]	y [micron]	x [micron]	y [micron]	x [micron]	y [micron]	x [micron]	y [micron]	x [micron]	y [micron]	x [micron]	y [micron]	x [micron]	y [micron]	x [micron]	y [micron]	x [micron]	y [micron]	x [micron]	y [micron]	x [micron]	y [micron]	x [micron]	x [micron]	x [micron]	y [micron]	x [micron]	y [micron]	x [micron]	y [micron]	x [micron]	y [micron]	x [micron]	y [micron]	x [micron]	y [micron]	x [micron]
20200207-G1-n1	cell-1 (panel F)			0	46.033	48.253	44.32	35.323	48.137	42.723	46.734	41.399
	lateral movement [%]	basal-apical movement [%]		1	45.566	48.253	43.463	33.22	47.358	42.723	46.267	40.698
	4.36981	-47.8989		2	44.865	47.669	41.827	30.962	46.501	44.748	45.878	36.881
	5.01662	-47.8989		3	44.982	47.552	41.438	30.027			46.267	33.999	41.672	38.439			41.126	45.995
	5.98754	-47.09		4	44.982	47.085	41.594	31.195			44.554	36.492	41.282	35.947			40.815	46.228
	5.82548	-46.928		5	44.982	46.734	41.048	29.56			43.463	33.844	41.36	36.803			41.126	45.605	40.114	29.949	44.943	40.386
	5.82548	-46.2812		6	45.332	46.501	41.672	30.884			43.541	35.479	40.192	39.997	40.114	39.919	42.684	43.969	40.893	32.753	45.255	38.361
	5.82548	-45.795		7	45.332	46.851	41.905	34.467			43.853	35.012	40.192	39.374	40.27	39.374			40.581	34.7	45.332	35.791															40.893	46.228
	5.34072	-45.4723		8	45.332	46.851					43.697	38.984	38.945	37.349	40.971	34.233					45.099	34.7															39.88	48.565
	5.34072	-45.9571		9	44.865	46.851					41.438	35.323	37.543	33.065	40.581	35.713					44.943	33.376															40.192	47.085	47.436	44.281
	5.34072	-45.9571		10	44.865	46.734					42.45	35.323	38.244	31.039							46.579	31.429															41.282	45.995	47.747	37.972
	5.98754	-45.9571		11	44.865	46.384					41.827	35.479	38.556	36.18							45.021	33.298																	47.124	37.427
	5.98754	-45.795		12	44.281	46.734					41.36	36.18	37.543	38.751							44.398	34.311																	47.124	40.62
	5.98754	-45.3102		13	44.164	46.851					40.815	32.597	39.023	40.075							45.021	33.688
	6.7964	-45.795		14	43.814	46.734					40.036	31.273	38.166	38.906							44.164	31.896																			44.709	38.361
	6.95845	-45.9571		15	43.814	47.436					40.659	31.896	39.646	44.437							44.086	33.22																			46.111	36.024
	7.44321	-45.795		16	43.93	47.669					40.503	35.791	39.257	42.723							44.086	33.921	46.267	43.736
	7.44321	-46.7673		17	43.93	47.903					42.061	38.673	37.543	35.479							43.619	35.479	47.747	34.934
	7.28255	-47.09		18	44.164	48.604					42.139	39.53	39.413	46.696							42.918	36.336	46.345	35.401
	7.28255	-47.4141		19	44.164	48.253					43.775	39.296											46.345	35.401	41.204	39.841			40.971	44.515
	6.95845	-48.385		20	44.281	49.071					42.45	35.246											46.345	35.947	40.737	36.726	48.137	39.53	40.347	43.502			46.501	42.022
	6.95845	-47.8989		21	43.814	48.604					44.008	40.231											47.28	35.479	39.88	31.429	46.968	40.153	40.27	43.969	42.918	36.336	46.812	42.334	47.747	50.356
	6.7964	-49.0319		22	43.814	47.903					43.853	42.489											47.046	37.193	39.101	29.014			40.27	42.567	43.074	37.037			48.993	51.603
	7.44321	-48.385		23	43.814	47.552																	44.943	32.13	38.712	28.469			39.335	43.113	43.93	41.165			48.448	51.369
	7.44321	-47.4141		24	43.463	47.436																	43.93	31.273	38.322	28.235			39.413	44.982					47.747	50.434
	7.44321	-46.928		25	42.879	48.721																	46.111	38.05	38.4	27.457			39.413	46.851													38.79	30.027
	7.92936	-46.7673		26	42.762	47.903																	45.332	39.685	37.933	28.703																	37.388	30.65
	8.73823	-48.5471		27	42.879	47.202																	46.033	41.866	38.945	28.002																	39.257	32.753			41.749	37.271
	8.90028	-47.4141		28	41.827	46.501																	45.177	41.399	38.868	28.391																	38.322	32.831	36.141	24.886	40.659	36.648	42.061
	8.73823	-46.4432		29	41.126	46.734																	44.476	39.374	38.011	29.715																	36.297	31.429	36.998	29.715	40.27	36.102	41.36
	10.1953	-45.4723		30	40.542	46.15																	44.398	42.412	37.699	28.158																	34.973	27.924	37.232	29.248	39.179	36.57	41.36
	11.1662	-45.795		31	40.308	45.332																	42.762	43.346	38.79	32.442																	35.051	28.547					41.438
	11.9751	-44.9861		32	40.192	45.099																			37.621	28.703																							40.659
	12.2992	-43.8532		33	40.192	45.099																			37.699	31.117																							40.659
	12.4598	-43.5305		34	40.542	44.982																			37.232	31.818																							40.503
	12.4598	-43.5305		35	40.308	43.697																			37.777	29.637																							40.581
	11.9751	-43.3684		36	40.308	44.047																			37.933	30.884																							40.114
	12.2992	-41.5886		37	40.308	43.58																			38.4	32.909																							42.139
	12.2992	-42.0734		38	40.192	44.398																			37.699	33.376																							40.737
	12.2992	-41.4266		39	40.659	44.982																			37.933	33.61																							40.425
	12.4598	-42.5596		40	40.659	44.982
	11.813	-43.3684		41	40.893	45.8
	11.813	-43.3684		42	40.659	45.449
	11.4889	-44.5014		43	41.36	44.631
	11.813	-44.0152		44	40.659	44.748
	10.8421	-42.8823		45	41.126	44.631
	11.813	-43.0443		46	41.126	44.631
	11.1662	-42.8823		47	40.659	46.033
	11.1662	-42.8823		48	40.659	46.033
	11.813	-44.8241		49	40.659	46.033
	11.813	-44.8241		50	40.659	43.697
	11.813	-44.8241		51	40.659	42.879
	11.813	-41.5886		52	40.659	42.879
	11.813	-40.4557		53	40.192	43.229
	11.813	-40.4557		54	39.491	41.827
	12.4598	-40.9404		55	39.491	41.36
	13.4307	-38.9986		56	39.491	41.126
	13.4307	-38.3518		57	39.491	40.425
	13.4307	-38.0277		58	39.257	40.659
	13.4307	-37.0568		59	39.257	40.659
	13.7548	-37.3809		60	39.257	40.659
	13.7548	-37.3809		61	38.556	40.425
	13.7548	-37.3809		62	38.089	39.607
	14.7258	-37.0568		63	37.504	39.257
	15.3726	-35.9238		64	37.738	38.322
	16.1828	-35.4391		65	37.738	38.322
	15.8587	-34.144		66	37.738	37.855
	15.8587	-34.144		67	37.738	37.037
	15.8587	-33.4972		68	37.738	37.037
	15.8587	-32.3643		69	37.388	36.803
	15.8587	-32.3643		70	37.388	36.687
	16.3435	-32.0402		71	37.855	36.102
	16.3435	-31.8795		72	37.504	36.453
	15.6967	-31.0693		73	37.855	36.453
	16.1828	-31.5554		74	38.089	35.401
	15.6967	-31.5554		75	38.439	34.934
	15.3726	-30.0983		76	38.439	35.752
	14.8878	-29.4515		77	37.504	35.051
	14.8878	-30.5845		78	37.154	34.233
	16.1828	-29.6136		79	38.089	33.999
	16.6676	-28.4806		80	39.14	33.415
	15.3726	-28.1565		81	38.79	33.181
	13.9169	-27.3476		82	38.556	33.532
	14.4017	-27.0235		83	38.556	33.532
	14.7258	-27.5097		84	38.089	34.233
	14.7258	-27.5097
	15.3726	-28.4806
[truncated: 101 more columns]

## Sheet: Fig 4-fig supp1F'-I'_cell-2
Figure 4-figure supplement 1F'-I'_cell-2			cell-2 (panel F'-I')	centroid		PROTRUSION-1		PROTRUSION-2		PROTRUSION-3		PROTRUSION-4		PROTRUSION-5		PROTRUSION-6		PROTRUSION-7		PROTRUSION-8		PROTRUSION-9		PROTRUSION-10		PROTRUSION-11		PROTRUSION-12		PROTRUSION-13		PROTRUSION-14		PROTRUSION-15		PROTRUSION-16		PROTRUSION-17		PROTRUSION-18		PROTRUSION-19		PROTRUSION-20		PROTRUSION-		PROTRUSION-22
			time (min)	x [micron]	y [micron]	x [micron]	y [micron]	x [micron]	y [micron]	x [micron]	y [micron]	x [micron]	y [micron]	x [micron]	y [micron]	x [micron]	y [micron]	x [micron]	y [micron]	x [micron]	y [micron]	x [micron]	y [micron]	x [micron]	y [micron]	x [micron]	y [micron]	x [micron]	y [micron]	x [micron]	y [micron]	x [micron]	y [micron]	x [micron]	x [micron]	x [micron]	y [micron]	x [micron]	y [micron]	x [micron]	y [micron]	x [micron]	y [micron]	x [micron]	y [micron]	x [micron]	y [micron]	x [micron]	y [micron]
cell-2 (panel G)			0	74.308	82.253	73.101	58.924	69.673	82.915
lateral movement [%]	basal-apical movement [%]		1	73.373	82.954	73.256	57.289	70.842	80.266
-2.78631	-50.4649		2	73.373	81.552	75.671	60.638
-1.54751	-51.3937		3	73.373	81.552	73.802	58.379
-1.54751	-49.5361		4	73.373	81.552	75.593	61.339
-1.54751	-49.5361		5	73.373	80.383	72.477	55.264
-1.54751	-49.5361		6	74.308	80.383	74.892	62.819
-1.54751	-47.9873		7	74.308	81.785	73.256	59.47
-2.78631	-47.9873		8	74.308	81.084	73.49	58.613
-2.78631	-49.8449		9	74.308	81.318	74.191	58.379											74.191	71.621
-2.78631	-48.9161		10	74.308	81.318	73.802	57.912											74.658	65.623
-2.78631	-49.2261		11	74.308	79.682	74.425	59.859													72.477	66.869
-2.78631	-49.2261		12	73.84	81.552	72.555	55.731													72.088	67.726
-2.78631	-47.0585		13	74.074	78.981	72.01	55.108													71.309	63.286
-2.16625	-49.5361		14	74.074	78.981	71.776	54.64													70.92	58.223
-2.47628	-46.1298		15	73.373	77.346	74.736	63.52													71.776	62.274
-2.47628	-46.1298		16	73.139	78.981	74.736	64.844													71.854	64.143
-1.54751	-43.9635		17	73.139	78.981	75.126	67.726													70.141	56.743
-1.23748	-46.1298		18	72.906	78.514	74.269	70.608													69.907	54.874
-1.23748	-46.1298		19	72.672	80.15	74.736	71.932													67.337	55.731
-0.92877	-45.511		20	71.971	78.981	74.269	73.49			69.985	61.806	73.957	65.078							69.362	57.99
-0.61874	-47.6786		21	71.971	78.981	77.618	77.93			71.387	64.844	70.842	67.337							70.141	61.261
0.310032	-46.1298		22	71.971	78.981	74.892	75.204			73.568	66.636	69.907	65.234							70.141	63.987
0.310032	-46.1298		23	71.971	78.981															70.219	66.869
0.310032	-46.1298		24	71.971	78.981															68.661	56.743
0.310032	-46.1298		25	71.971	80.617															70.452	59.937
0.310032	-46.1298		26	72.438	78.748															70.608	59.859
0.310032	-48.2973		27	72.438	78.514															70.452	62.352
-0.30871	-45.8211		28	72.205	79.215															69.751	56.042
-0.30871	-45.511		29	72.205	77.579															69.907	51.213
0	-46.4398		30	71.036	80.15															71.776	50.123	67.337	72.867
0	-44.2722		31	71.504	79.449									70.608	70.92	72.01	85.563			69.907	57.678	67.103	72.789
1.54883	-47.6786		32	71.27	78.28									70.452	71.309	72.789	87.666			70.842	62.274
0.92877	-46.7498		33	71.27	78.047									71.543	74.58	72.789	87.666			69.985	65.078
1.2388	-45.201		34	71.971	79.215									70.141	71.387	72.867	87.9			67.025	58.379			68.739	84.628	65.623	70.608
1.2388	-44.8923		35	72.205	78.047									66.791	65.857	73.724	87.978			67.337	59.236			71.075	85.018	67.103	70.608	70.686	65.467
0.310032	-46.4398		36	72.205	78.047									67.103	64.143	73.724	87.978			68.972	61.806			71.621	89.38			71.543	62.507
0	-44.8923		37	72.205	78.047									66.791	63.676	72.711	87.277			71.309	65.857			71.543	91.249
0	-44.8923		38	72.438	78.514									65.857	60.872					71.075	62.819			73.023	90.782							69.673	73.957
0	-44.8923		39	72.672	78.748									65.623	60.872					70.92	57.756			72.711	90.548							75.437	74.97
-0.30871	-45.511		40	72.672	78.748									65.389	61.105					71.387	55.731			72.711	89.769							75.671	74.736
-0.61874	-45.8211		41	72.672	78.748									65.779	64.61					72.555	62.975			72.477	88.601							75.982	75.749	77.54	77.618
-0.61874	-45.8211		42	73.139	78.981									65.389	64.455					72.322	53.472			72.555	91.716									77.54	77.54	68.972	77.54
-0.61874	-45.8211		43	73.607	78.981									64.688	60.638					71.075	55.108			72.867	90.314											68.271	75.048	75.437	85.485
-1.23748	-46.1298		44	72.672	78.047									67.103	66.636					72.088	59.392																	74.269	88.679	72.088	86.42
-1.85754	-46.1298		45	72.672	78.047									67.96	71.465					71.621	61.105																	73.49	88.211	71.621	87.51	67.025	76.372
-0.61874	-44.8923		46	71.737	78.047															71.153	58.847																	72.711	89.068	71.621	87.277			70.686	85.719
-0.61874	-44.8923		47	71.737	77.346															70.92	58.691																	73.568	86.965					71.309	86.264	68.427	75.437
0.620063	-44.8923		48	71.971	77.346															70.452	59.859																							69.362	82.603	64.455	72.088	73.724	74.269
0.620063	-43.9635		49	71.971	77.813															71.543	60.56																									65.779	73.724
0.310032	-43.9635		50	71.737	76.878															71.543	59.703
0.310032	-44.5823		51	71.737	76.878															69.907	57.912
0.620063	-43.3435		52	71.504	78.28															70.141	58.379
0.620063	-43.3435		53	71.504	78.047															69.673	59.002
0.92877	-45.201		54	71.504	78.047															68.038	54.874
0.92877	-44.8923		55	71.504	78.047															69.985	59.703
0.92877	-44.8923		56	71.504	78.047															70.219	61.962
0.92877	-44.8923		57	71.504	76.878															70.686	61.806
0.92877	-44.8923		58	71.27	75.71															68.193	56.977
0.92877	-43.3435		59	71.27	75.71															70.374	59.47
1.2388	-41.796		60	71.27	75.71															70.141	59.392
1.2388	-41.796		61	71.036	75.476															69.595	58.223
1.2388	-41.796		62	71.036	75.476															68.271	57.211
1.54883	-41.4859		63	71.036	75.243															67.57	52.382
1.54883	-41.4859		64	71.036	74.775															67.57	52.459
1.54883	-41.1772		65	71.036	73.373															67.57	52.459
1.54883	-40.5572		66	70.102	70.569															67.492	53.939
1.54883	-38.6996		67	68.933	71.504															68.427	55.575
2.78631	-34.9845		68	68.933	70.569															67.57	53.706
4.33514	-36.2233		69	68.466	70.102															68.193	55.497
4.33514	-34.9845		70	68.466	69.634
4.95388	-34.3658		71	67.999	69.634
4.95388	-33.7457		72	67.531	68.466
5.57262	-33.7457		73	67.531	67.064
6.19268	-32.1982		74	66.597	67.064
6.19268	-30.3407		75	67.765	67.298
7.43016	-30.3407		76	67.531	67.064
5.88265	-30.6507		77	67.298	67.064
6.19268	-30.3407		78	65.896	67.298
6.50139	-30.3407		79	65.896	66.83
8.35893	-30.6507		80	65.896	66.83
8.35893	-30.0307		81	65.896	66.597
8.35893	-30.0307		82	65.896	66.363
8.35893	-29.722		83	65.896	66.363
8.35893	-29.4119		84	65.428	66.363
8.35893	-29.4119		85	65.195	66.597
8.97899	-29.4119		86	65.896	67.298
9.2877	-29.722		87	65.896	67.531
8.35893	-30.6507		88	64.727	68.232
8.35893	-30.9594		89	64.727	68.232
9.90776	-31.8882		90	65.662	68.933
9.90776	-31.8882		91	65.896	68.7
8.66896	-32.817		92	65.896	67.298
8.35893	-32.5083		93	65.662	67.999
8.35893	-30.6507		94	65.662	67.531
8.66896	-31.5795		95	65.662	68.466
8.66896	-30.9594		96	65.662	67.298
8.66896	-32.1982		97	65.662	67.064
8.66896	-30.6507		98	64.961	65.896
8.66896	-30.3407		99	65.428	67.531
9.59773	-28.7932		100	65.662	65.896
8.97899	-30.9594		101	65.662	65.896
8.66896	-28.7932		102	66.129	66.597
8.66896	-28.7932		103	66.129	65.428
8.05022	-29.722		104	64.961	64.494
8.05022	-28.1731		105	66.363	67.531
9.59773	-26.9356		106	66.129	67.765
7.74019	-30.9594		107	66.129	67.298
8.05022	-31.2695		108	66.597	69.401
8.05022	-30.6507		109	66.83	69.401
7.43016	-33.437		110	67.531	70.102
7.12145	-33.437		111	68.933	69.167
6.19268	-34.3658		112	67.064	68.7
4.33514	-33.127		113	67.298	66.129
6.81142	-32.5083		114	67.531	65.662
6.50139	-29.1019		115	67.531	63.325
6.19268	-28.4832		116	66.83	62.391
6.19268	-25.3868		117	66.83	62.391
7.12145	-24.1493		118	67.531	59.353
7.12145	-24.1493		119	67.765	56.782
6.19268	-20.1242		120	66.363	56.315
5.88265	-16.7179		121	65.896	56.315
7.74019	-16.0991		122	65.428	56.081
8.35893	-16.0991		123	65.428	55.848
8.97899	-15.7891		124	66.597	54.679
8.97899	-15.4804		125	67.298	55.848
7.43016	-13.9315		126	66.597	55.147
6.50139	-15.4804		127	66.363	53.511
7.43016	-14.5516		128	67.298	54.446
7.74019	-12.384		129	67.531	54.446
6.50139	-13.6228		130	69.167	54.446																									69.673	73.957
6.19268	-13.6228		131	69.167	54.212
4.02511	-13.6228		132	68.466	53.978
4.02511	-13.3128		133	68.466	53.978
4.95388	-13.0028		134	68.466	53.978
4.95388	-13.0028		135	68.466	53.978
4.95388	-13.0028		136	66.83	54.679
4.95388	-13.0028		137	66.83	54.679
7.12145	-13.9315		138	66.83	55.848
7.12145	-13.9315		139	66.83	55.848
7.12145	-15.4804		140	67.298	54.913
7.12145	-15.4804		141	67.064	54.913
6.50139	-14.2416		142	65.896	54.679
6.81142	-14.2416		143	65.896	54.913
8.35893	-13.9315		144	66.597	54.913
8.35893	-14.2416		145	68.466	56.315
7.43016	-14.2416		146	67.765	56.315
4.95388	-16.0991		147	67.765	56.315
5.88265	-16.0991		148	67.064	55.147
5.88265	-16.0991		149	67.298	55.38
6.81142	-14.5516		150	67.298	55.614
6.50139	-14.8603		151	67.298	55.614
6.50139	-15.1703		152	67.531	55.614
6.50139	-15.1703		153	67.531	55.614
6.19268	-15.1703		154	67.531	55.614
6.19268	-15.1703		155	66.83	57.016
6.19268	-15.1703		156	66.83	57.016
7.12145	-17.0279		157	66.83	57.951
7.12145	-17.0279		158	66.83	56.315
7.12145	-18.2667		159	67.298	56.315
7.12145	-16.0991		160	67.531	56.315
6.50139	-16.0991		161	69.167	55.848
6.19268	-16.0991		162	69.167	54.212
4.02511	-15.4804		163	69.167	54.212
4.02511	-13.3128		164	70.803	53.978
4.02511	-13.3128		165	70.803	53.978
1.85754	-13.0028		166	71.036	53.978
1.85754	-13.0028		167	71.27	53.978
1.54883	-13.0028		168	71.504	53.978
1.2388	-13.0028		169	72.906	54.212
0.92877	-13.0028		170	73.139	54.212
-0.92877	-13.3128		171	73.139	54.679
-1.23748	-13.3128		172	73.139	54.446
-1.23748	-13.9315		173	73.139	54.446
-1.23748	-13.6228		174	73.607	54.679
-1.23748	-13.6228		175	74.308	54.679
-1.85754	-13.9315		176	74.308	54.212
-2.78631	-13.9315		177	74.308	54.212
-2.78631	-13.3128		178	74.542	54.212
-2.78631	-13.3128		179	74.542	54.212
-3.09634	-13.3128		180	74.542	54.212
-3.09634	-13.3128		181	74.542	54.212
-3.09634	-13.3128		182	74.542	54.212
-3.09634	-13.3128		183	74.542	54.212
-3.09634	-13.3128		184	74.542	54.212
-3.09634	-13.3128		185	74.542	54.446
-3.09634	-13.3128		186	74.775	54.446
-3.09634	-13.6228		187	74.775	54.446
-3.40505	-13.6228		188	74.775	54.446
-3.40505	-13.6228		189	74.775	54.446
-3.40505	-13.6228		190	74.775	54.446
-3.40505	-13.6228		191	74.775	54.446
-3.40505	-13.6228		192	75.009	52.81
-3.40505	-13.6228		193	75.009	53.044
-3.71508	-11.4553		194	75.009	53.044
-3.71508	-11.7653		195	75.009	53.044
-3.71508	-11.7653		196	75.009	53.044
-3.71508	-11.7653		197	74.308	52.81
-3.71508	-11.7653		198	78.047	52.576
-2.78631	-11.4553		199	78.514	52.576
-7.74019	-11.1452
-8.35893	-11.1452
[truncated: 232 more columns]

## Sheet: Fig 4-fig supp1F''-I''_cell-3
Figure 4-figure supplement 1F''-I''_cell-3			cell-3 (panel F''-I'')	centroid		PROTRUSION-1		PROTRUSION-2		PROTRUSION-3		PROTRUSION-4		5		6		7		8		9		10		11		12		13	4060	14		15		16		17		18		19		20		21		22
			time (min)	x [micron]	y [micron]	x [micron]	y [micron]	x [micron]	y [micron]	x [micron]	y [micron]	x [micron]	y [micron]	x [micron]	y [micron]	x [micron]	y [micron]	x [micron]	y [micron]	x [micron]	y [micron]	x [micron]	y [micron]	x [micron]	y [micron]	x [micron]	y [micron]	x [micron]	y [micron]	x [micron]	y [micron]	x [micron]	y [micron]	x [micron]	x [micron]	x [micron]	y [micron]	x [micron]	y [micron]	x [micron]	y [micron]	x [micron]	y [micron]	x [micron]	y [micron]	x [micron]	y [micron]	x [micron]	y [micron]
cell-3 (panel H)			0	91.132	90.899	86.167	74.308	88.503	102.933
lateral movement [%]	basal-apical movement [%]		1	90.431	88.095	86.342	73.432	88.328	102.699
-6.47186	-60.5181		2	90.431	90.665	86.108	74.191	88.679	100.888
-5.50101	-56.6347		3	90.431	90.665	88.095	79.215	88.854	100.888
-5.50101	-60.194		4	90.431	90.665	87.978	80.266	88.62	101.122
-5.50101	-60.194		5	90.431	90.431	86.108	73.432	88.27	100.245
-5.50101	-60.194		6	90.431	89.964	87.335	74.892	88.095	98.785	89.497	74.658
-5.50101	-59.8699		7	89.964	86.692	87.218	75.593			89.555	73.373
-5.50101	-59.2231		8	89.497	89.263	87.686	76.528			90.022	60.463
-4.85424	-54.6916		9	88.796	88.328	87.16	76.878			90.49	58.535
-4.20747	-58.2523		10	89.497	87.627	88.095	76.82			91.015	60.989
-3.23662	-56.9574		11	89.497	87.861					90.081	63.208
-4.20747	-55.9865		12	89.497	89.263					90.022	68.408
-4.20747	-56.3106		13	89.497	87.627					89.847	72.205
-4.20747	-58.2523		14	89.73	88.095					90.081	71.854					90.431	74.308			85.174	93.177
-4.20747	-55.9865		15	89.964	85.057					84.823	68.875					88.62	72.731			83.713	92.826
-4.53017	-56.6347		16	89.029	85.758					85.349	70.16					88.153	73.724			83.596	90.723
-4.85424	-52.4272		17	87.393	81.318					85.641	67.999					88.328	66.947	90.665	74.191	84.94	90.198	84.765	84.356
-3.55932	-53.3981		18	88.095	83.421					85.933	66.071					88.62	69.868	90.314	73.023	84.414	86.342	78.28	80.5
-1.29354	-47.2489		19	88.095	82.486					85.758	72.146					88.095	66.188	89.555	75.067	83.538	84.589	78.923	82.837
-2.26578	-50.1614		20	87.627	81.785					87.569	73.432					89.204	62.098			83.772	83.012
-2.26578	-48.8665		21	87.627	79.916							92.184	77.521			88.095	70.744			84.473	81.493			93.118	81.318
-1.61762	-47.8957		22	87.627	79.682											88.095	71.27			84.765	80.091			92.768	81.026
-1.61762	-45.3072		23	88.562	81.785											88.503	74.658							92.476	80.617
-1.61762	-44.9831		24	88.562	81.552									86.809	79.332	87.919	67.999							92.885	82.077
-2.91255	-47.8957		25	89.263	83.187									86.809	80.383	87.919	70.394							91.132	82.428
-2.91255	-47.573		26	89.497	83.187									83.596	77.521	88.445	73.84
-3.88339	-49.8374		27	89.73	83.187									84.005	77.521
-4.20747	-49.8374		28	88.095	80.617									85.349	76.645											88.562	74.834
-4.53017	-49.8374		29	87.861	81.785									83.071	72.672											88.445	73.315
-2.26578	-46.278		30	87.861	82.486									82.837	75.593											88.912	70.394
-1.9417	-47.8957		31	88.328	82.486									84.122	77.346											88.737	75.301
-1.9417	-48.8665		32	88.328	82.486									84.823	77.755											88.387	70.803
-2.58847	-48.8665		33	88.328	82.019									84.297	66.363											87.627	71.329
-2.58847	-48.8665		34	88.095	80.617									84.473	68.408											87.802	68.291
-2.58847	-48.2197		35	88.095	82.253									84.297	66.012											88.211	59.061
-2.26578	-46.278		36	88.095	81.552									85.466	73.198											88.971	62.274
-2.26578	-48.5438		37	88.095	81.552									85.816	70.335											89.146	57.834
-2.26578	-47.573		38	88.095	80.617									86.284	71.679											88.387	61.222
-2.26578	-47.573		39	88.095	82.019									81.143	57.074											86.751	61.573
-2.26578	-46.278		40	86.926	83.421									81.143	57.074											86.4	61.397
-2.26578	-48.2197		41	86.926	82.253									84.297	66.071											87.101	61.631
-0.64677	-50.1614		42	86.926	82.954									80.967	56.373											86.284	63.15
-0.64677	-48.5438		43	86.926	81.785									79.332	51.992											85.933	67.356
-0.64677	-49.5147		44	86.926	82.019									80.15	56.14											85.699	69.868
-0.64677	-47.8957		45	86.459	80.617									82.311	62.332											86.284	68.933
-0.64677	-48.2197		46	86.459	81.552									83.596	63.208											87.627	64.786							85.699	59.411
0	-46.278		47	86.459	79.916									83.479	64.61											85.641	66.597							86.751	59.645
0	-47.573		48	85.758	81.318									84.297	65.311											84.998	65.487					85.875	67.648
0	-45.3072		49	85.758	81.084									80.792	59.586											84.94	61.164					85.933	67.181
0.970849	-47.2489		50	85.758	80.617									82.545	60.696											85.524	66.772					86.576	67.707
0.970849	-46.9248		51	85.758	82.019									83.596	62.449											84.648	66.129	84.765	91.95
0.970849	-46.278		52	85.758	82.486									84.531	63.909											84.648	67.823	84.414	91.074
0.970849	-48.2197		53	85.057	81.552									83.655	61.923											84.94	66.655	83.304	91.424
0.970849	-48.8665		54	83.655	81.318									83.655	60.696											85.29	67.356	83.421	93.177	83.363	70.394
1.9417	-47.573		55	83.655	81.318									84.473	59.586											86.4	66.947	83.363	90.84	82.954	68.817
3.88339	-47.2489		56	83.655	81.318									84.823	60.872											86.751	67.356	83.713	89.321	84.064	67.122
3.88339	-47.2489		57	83.655	80.617									83.947	60.112											86.459	67.999	84.297	91.424							80.792	59.645
3.88339	-47.2489		58	83.888	81.084									84.297	60.346											85.758	66.305	83.596	89.204							80.851	59.645			86.284	71.621
3.88339	-46.278		59	83.888	81.552									84.297	60.346											85.466	67.882	82.486	89.497							81.552	63.968			87.335	69.342
3.5607	-46.9248		60	84.122	81.552									84.18	62.507											86.576	68.408									81.727	67.999			88.445	67.473
3.5607	-47.573		61	84.122	81.318									84.18	62.799											85.174	68.466									81.785	72.497			87.978	66.48
3.23662	-47.573		62	84.122	81.318									83.83	64.961											84.998	71.796									82.077	73.49			88.737	66.48
3.23662	-47.2489		63	84.823	80.383									81.669	66.246																					82.486	73.957			89.088	66.48
3.23662	-47.2489		64	84.823	82.72									82.194	63.15																					82.837	75.009			88.796	66.421
2.26578	-45.954		65	85.29	83.187									82.662	68.7																					80.792	78.864	82.077	91.366	88.562	65.311
2.26578	-49.1906		66	85.057	84.122									84.648	65.837																					80.617	79.974	81.727	91.541	88.27	66.772
1.619	-49.8374		67	84.356	82.019									83.947	66.713																					80.325	81.376	81.785	90.84	87.861	64.085
1.9417	-51.1323		68	84.356	82.019									81.961	69.518																							82.428	90.49	88.562	61.748
2.91255	-48.2197		69	84.356	82.486									81.493	71.27																							82.954	91.6	89.263	61.806
2.91255	-48.2197		70	84.589	82.954									81.844	77.755																							82.954	90.49	89.321	64.26
2.91255	-48.8665		71	84.589	82.954																																			88.387	64.61
2.58985	-49.5147		72	84.589	82.954																																			90.198	58.827	84.823	70.627
2.58985	-49.5147		73	84.589	81.785																																			88.737	61.222	84.765	69.634
2.58985	-49.5147		74	84.589	81.785																																			88.796	63.909	85.29	71.621
2.58985	-47.8957		75	84.589	82.954																																			87.978	63.734	85.349	71.971
2.58985	-47.8957		76	84.823	81.785																																			88.445	67.006	84.589	70.335
2.58985	-49.5147		77	84.823	82.019																																			87.101	66.071	84.589	72.322
2.26578	-47.8957		78	84.823	82.019																																			87.277	63.5	84.589	67.298
2.26578	-48.2197		79	84.356	80.383																																			86.751	65.72	83.947	63.559	81.727	88.211
2.26578	-48.2197		80	84.356	78.748																																			86.926	65.954	84.648	63.559	82.837	87.51
2.91255	-45.954		81	84.589	78.748																																			86.926	65.195	84.414	71.504	83.304	86.868
2.91255	-43.6896		82	84.356	78.28																																			88.62	56.14	85.466	62.683	83.596	86.167
2.58985	-43.6896		83	84.589	77.112																																			88.211	56.724	85.466	62.683	83.596	85.29
2.91255	-43.0414		84	84.589	77.112																																			89.672	53.978	85.699	63.5	84.122	85.991
2.58985	-41.4238		85	84.589	77.112																																			90.139	54.971	86.225	63.325	85.933	86.517
2.58985	-41.4238		86	84.589	77.112																																			90.373	56.023	86.108	64.26	85.641	88.562
2.58985	-41.4238		87	84.589	77.112																																			90.022	57.074	86.634	62.274	85.758	85.524	83.421	84.356
2.58985	-41.4238		88	84.589	77.112																																			88.095	57.425	84.648	65.37	86.05	82.954	82.136	82.662
2.58985	-41.4238		89	84.356	75.243																																			87.802	62.332	85.115	66.129			82.603	82.778	86.459	77.93
2.58985	-41.4238		90	84.356	75.243																																			86.634	63.033	84.648	64.961					86.985	75.301
2.91255	-38.8353		91	84.356	75.243																																			87.802	61.222	86.225	63.208
2.91255	-38.8353		92	84.356	75.243																																			87.101	59.937
2.91255	-38.8353		93	84.356	75.476																																			87.452	61.748
2.91255	-38.8353		94	84.356	75.476																																			88.036	62.858
2.91255	-39.158		95	84.356	77.346																																			87.16	64.318
2.91255	-39.158		96	84.122	78.514
2.91255	-41.7479		97	83.888	78.981
3.23662	-43.3655		98	83.888	78.981
3.5607	-44.0123		99	83.888	79.215
3.5607	-44.0123		100	83.888	79.215
3.5607	-44.3363		101	83.888	78.28
3.5607	-44.3363		102	84.589	77.112
3.5607	-43.0414		103	84.823	76.411
2.58985	-41.4238		104	85.29	76.411
2.26578	-40.4529		105	86.225	78.28
1.619	-40.4529		106	86.459	77.346
0.324078	-43.0414		107	86.459	78.28
0	-41.7479		108	85.991	78.28
0	-43.0414		109	85.758	78.047
0.648156	-43.0414		110	85.758	78.047
0.970849	-42.7187		111	85.758	77.579
0.970849	-42.7187		112	85.758	77.579
0.970849	-42.0706		113	85.758	77.579
0.970849	-42.0706		114	85.758	77.579
0.970849	-42.0706		115	85.758	77.579
0.970849	-42.0706		116	85.758	77.346
0.970849	-42.0706		117	86.225	77.346
0.970849	-41.7479		118	86.225	77.346
0.324078	-41.7479		119	85.991	74.308
0.324078	-41.7479		120	85.991	75.243
0.648156	-37.5404		121	85.29	75.71
0.648156	-38.8353		122	85.29	75.71
1.619	-39.4821		123	85.758	77.346
1.619	-39.4821		124	85.758	75.944
0.970849	-41.7479		125	85.29	75.476
0.970849	-39.8062		126	85.29	75.476
1.619	-39.158		127	85.29	75.476
1.619	-39.158		128	85.29	75.476
1.619	-39.158		129	85.29	75.476
1.619	-39.158		130	85.524	74.074
1.619	-39.158		131	85.524	74.074
1.29493	-37.2163		132	85.524	75.243
1.29493	-37.2163		133	85.758	75.243
1.29493	-38.8353		134	86.459	75.476
0.970849	-38.8353		135	86.692	75.476
0	-39.158		136	87.393	75.476
-0.32269	-39.158		137	87.861	75.476
-1.29354	-39.158		138	87.627	75.009
-1.9417	-39.158		139	87.627	75.009
-1.61762	-38.5113		140	87.627	75.009
-1.61762	-38.5113		141	86.692	76.177
-1.61762	-38.5113		142	86.692	76.177
-0.32269	-40.1289		143	86.459	76.645
-0.32269	-40.1289		144	86.459	76.645
0	-40.777		145	85.991	77.579
0	-40.777		146	86.225	76.177
0.648156	-42.0706		147	86.225	75.71
0.324078	-40.1289		148	86.692	76.645
0.324078	-39.4821		149	86.692	76.645
-0.32269	-40.777		150	86.692	76.645
-0.32269	-40.777		151	86.692	76.411
-0.32269	-40.777		152	86.692	74.775
-0.32269	-40.4529		153	86.692	74.775
-0.32269	-38.1872		154	86.692	74.775
-0.32269	-38.1872		155	86.692	74.775
-0.32269	-38.1872		156	86.926	74.775
-0.32269	-38.1872		157	86.692	74.775
-0.64677	-38.1872		158	86.459	73.84
-0.32269	-38.1872		159	85.991	73.84
0	-36.8922		160	85.524	74.308
0.648156	-36.8922		161	85.29	74.308
1.29493	-37.5404		162	85.29	75.476
1.619	-37.5404		163	85.29	74.542
1.619	-39.158		164	85.524	74.542
1.619	-37.8645		165	85.524	75.243
1.29493	-37.8645		166	85.524	74.542
1.29493	-38.8353		167	85.524	73.607
1.29493	-37.8645		168	85.524	71.504
1.29493	-36.5696		169	86.926	69.868
1.29493	-33.657		170	87.16	68.933
-0.64677	-31.3912		171	87.16	68.232
-0.97085	-30.0963		172	87.16	68.232
-0.97085	-29.1255		173	87.16	69.634
-0.97085	-29.1255		174	85.991	70.102
-0.97085	-31.0672		175	85.991	69.868
0.648156	-31.7153		176	85.991	68.933
0.648156	-31.3912		177	85.758	67.064
0.648156	-30.0963		178	85.758	67.064
0.970849	-27.5078		179	85.758	66.83
0.970849	-27.5078		180	86.225	66.597
0.970849	-27.1838		181	86.225	66.597
0.324078	-26.8611		182	86.225	66.597
0.324078	-26.8611		183	86.225	66.363
0.324078	-26.8611		184	86.225	66.363
0.324078	-26.537		185	86.225	66.363
0.324078	-26.537		186	86.459	65.896
0.324078	-26.537		187	86.692	65.195
0	-25.8902		188	86.692	65.195
-0.32269	-24.9194		189	86.692	65.195
-0.32269	-24.9194		190	86.692	65.195
-0.32269	-24.9194		191	86.692	65.428
-0.32269	-24.9194		192	87.393	64.961
-0.32269	-25.2421		193	87.393	64.961
-1.29354	-24.5953		194	87.16	64.961
-1.29354	-24.5953		195	87.16	64.26
-0.97085	-24.5953		196	87.16	63.793
-0.97085	-23.6244		197	87.393	63.325
-0.97085	-22.9777		198	88.095	64.026
-1.29354	-22.3295		199	88.095	64.961
-2.26578	-23.3004		200	88.095	63.793
-2.26578	-24.5953		201	88.562	63.793
-2.26578	-22.9777		202	88.328	64.727
-2.91255	-22.9777		203	88.328	64.026
-2.58847	-24.2712		204	90.198	63.559
-2.58847	-23.3004		205	89.73	63.793
-5.17832	-22.6536		206	89.263	64.494
-4.53017	-22.9777		207	89.263	63.325
-3.88339	-23.9485		208	89.263	63.325
-3.88339	-22.3295		209	89.263	63.325
-3.88339	-22.3295		210	90.198	61.923
-3.88339	-22.3295		211	90.198	61.923
-5.17832	-20.3878		212	89.73	63.793
-5.17832	-20.3878		213	89.73	62.858
-4.53017	-22.9777		214	89.73	62.157
-4.53017	-21.6827		215	90.198	61.69
-4.53017	-20.7119		216	90.198	61.69
-5.17832	-20.0651		217	90.665	62.157
-5.17832	-20.0651
-5.82509	-20.7119
[truncated: 322 more columns]

## Sheet: Fig 4-fig supp1F'''-I'''_cell-4
Figure 4-figure supplement 1F'''-I'''_cell-4			cell-4 (panel F'''-I''')	centroid		PROTRUSION-1		PROTRUSION-2		PROTRUSION-3		PROTRUSION-4		PROTRUSION-5		PROTRUSION-6		PROTRUSION-7		PROTRUSION-8		PROTRUSION-9		PROTRUSION-10		PROTRUSION-11		PROTRUSION-12		PROTRUSION-13		PROTRUSION-14		PROTRUSION-15		PROTRUSION-16		PROTRUSION-17		PROTRUSION-18		PROTRUSION-19		PROTRUSION-20		PROTRUSION-21		PROTRUSION-22
			time (min)	x [micron]	y [micron]	x [micron]	y [micron]	x [micron]	y [micron]	x [micron]	y [micron]	x [micron]	y [micron]	x [micron]	y [micron]	x [micron]	y [micron]	x [micron]	y [micron]	x [micron]	y [micron]	x [micron]	y [micron]	x [micron]	y [micron]	x [micron]	y [micron]	x [micron]	y [micron]	x [micron]	y [micron]	x [micron]	y [micron]	x [micron]	x [micron]	x [micron]	y [micron]	x [micron]	y [micron]	x [micron]	y [micron]	x [micron]	y [micron]	x [micron]	y [micron]	x [micron]	y [micron]	x [micron]	y [micron]
cell-4 (panel I)			0	84.239	60.95	90.003	40.386	85.174	71.698			90.47	80.266									80.89	55.965	84.55	53.472			80.967	60.95	82.136	37.271
lateral movement [%]	basal-apical movement [%]		1	84.395	60.95	88.757	44.67	82.759	72.01	82.759	71.932	88.523	76.06									79.877	56.12	82.37	53.939			79.721	61.884	80.967	38.439
-0.8897	-56.0625		2	83.772	62.196	87.355	48.721	83.849	72.01	82.525	74.892	89.302	71.698									80.344	57.756	80.89	49.889			80.422	61.573	80.422	36.881
-1.11248	-56.0625		3	84.239	61.261	86.576	48.643	84.317	73.178	82.525	74.892	88.99	70.92											81.669	51.836					80.734	36.959
-0.22278	-57.8419		4	84.239	61.261	86.342	48.721	84.55	72.4	83.849	75.593	89.691	69.985											82.603	51.603					81.123	34.622
-0.8897	-56.5067		5	84.239	63.754	85.953	50.434	85.641	78.631	84.005	80.578	89.691	68.661											76.839	43.658					81.201	33.143
-0.8897	-56.5067		6	84.55	60.794	86.108	44.67	85.719	74.658	83.304	77.774	89.769	69.751											78.475	47.786					80.189	31.741
-0.8897	-60.0669		7	85.018	62.196	86.108	48.253			83.304	77.774	89.458	69.751													88.757	63.598			79.721	30.728
-1.33384	-55.8397		8	85.018	62.196	84.94	54.407			83.772	78.475	89.691	70.764																	81.435	37.271
-2.00218	-57.8419		9	85.174	62.196					83.772	80.111	89.847	69.985																	81.591	39.374
-2.00218	-57.8419		10	85.174	62.196					83.46	76.294	88.601	67.57																	81.201	40.386	85.174	52.537
-2.22496	-57.8419		11	85.174	60.326					84.317	84.161	89.302	75.827																	81.591	42.723	86.654	49.344
-2.22496	-57.8419		12	84.55	61.728					83.46	76.294	88.757	72.244																	83.226	41.555	87.355	48.409
-2.22496	-55.1714		13	84.395	61.105					83.226	75.126	88.601	69.595																	84.784	40.542	86.108	51.758
-1.33384	-57.1736		14	84.395	61.105					83.616	73.646	87.9	66.947																	83.538	42.022	86.108	51.758
-1.11248	-56.2839		15	84.55	62.04					83.538	73.646	88.757	67.804																	82.136	41.243	85.485	48.409											79.877	54.874
-1.11248	-56.2839		16	84.083	62.819					83.304	73.568	87.432	66.636																	80.734	43.19	85.174	49.422									79.877	62.897	80.422	53.939
-1.33384	-57.6191		17	83.46	61.884					83.849	76.294	86.654	67.103																	81.591	41.788	85.641	51.992					86.186	57.367			78.942	64.065	80.111	54.952
-0.66692	-58.7316		18	83.148	59.548					82.058	72.945	86.108	69.985																	80.734	42.957	84.94	52.226					87.666	61.417			77.852	62.663	79.721	54.485
0.222782	-57.3964		19	82.837	60.95					83.772	75.515																			81.669	45.761	85.641	51.525					88.523	69.05			78.709	62.897	79.41	55.887
0.668346	-54.0603		20	83.304	58.924					83.226	75.281			83.616	68.583															81.201	47.474	84.083	50.201					87.432	70.296			79.02	64.221	78.942	57.289
1.11248	-56.0625		21	82.837	60.482					83.538	86.887			85.875	70.452	83.226	75.048													80.189	49.11	84.784	51.525			86.342	65.545	87.432	67.103			79.488	64.455	79.643	59.937
0.445564	-53.1692		22	82.993	59.392					83.538	82.447			86.108	75.982	83.772	77.462													80.656	50.902	86.108	50.434			85.719	65.078	88.056	64.299	87.121	58.769	79.877	64.533	80.422	60.015
1.11248	-55.3942		23	82.993	60.482					83.772	83.148			87.121	73.879	82.993	74.58													80.656	48.253	86.887	47.241					88.133	65.779	87.666	58.691
0.8897	-53.8376		24	83.148	60.482					82.759	75.515			86.108	74.658	82.136	70.296													79.254	44.592	86.42	48.721					88.523	62.819	87.588	58.301
0.8897	-55.3942		25	83.148	59.392					82.837	73.412			85.641	74.347	81.591	68.661													78.475	44.904	85.641	49.422	79.955	60.404			87.822	63.364	87.822	57.367
0.668346	-55.3942		26	84.395	59.08					83.538	73.334			85.719	69.284	82.525	67.804			87.822	67.103									78.942	46.072	86.186	50.356	80.344	59.47					88.601	56.588
0.668346	-53.8376		27	84.55	59.08					82.993	72.945			84.706	67.648	82.136	67.181			87.588	67.103									77.307	41.477	85.953	50.59	79.02	54.173
-1.11248	-53.392		28	84.55	59.08					82.525	71.932					81.435	67.57	86.108	71.698	87.355	67.648									77.774	39.763			78.787	52.226													82.058	45.294
-1.33384	-53.392		29	83.46	59.703					82.525	71.932					81.591	67.103	84.239	66.869	86.965	68.661									75.126	39.062			80.5	57.133											82.292	48.721
-1.33384	-53.392		30	84.55	58.613					82.993	71.932					81.824	66.947			88.289	69.595									78.241	44.826															83.071	48.876
0.222782	-54.2817		31	86.264	58.301					83.071	70.53					82.37	64.922			88.056	74.658									79.02	43.19															83.071	44.203
-1.33384	-52.7251		32	85.641	58.301					83.772	73.802					81.902	67.648			88.056	72.4									74.503	33.065															83.616	44.592
-3.78158	-52.2795		33	85.018	58.145					84.473	76.216					82.37	66.947			89.068	73.101									76.372	33.143															81.669	46.228
-2.89188	-52.2795		34	85.018	55.809					84.005	74.035					81.591	69.518			88.056	67.648									79.488	40.854															83.071	49.188
-2.00218	-52.0567		35	85.018	58.769					83.538	72.4					80.967	70.063			88.289	67.337									79.41	44.904
-2.00218	-48.7207		36	85.174	57.367					82.993	71.932					81.902	69.05			87.588	68.038									80.111	41.555
-2.00218	-52.9479		37	85.018	56.588					82.837	72.166									87.199	67.414									81.435	37.037
-2.22496	-50.9457		38	83.304	57.055					82.525	70.296																			79.41	39.062
-2.00218	-49.8332		39	84.083	55.653					81.824	68.349																			78.787	44.826
0.445564	-50.5001		40	83.927	57.367					81.902	70.53
-0.66692	-48.4979		41	84.395	54.095					82.058	71.543
-0.44414	-50.9457		42	83.304	54.718					81.123	68.894
-1.11248	-46.273		43	83.304	55.653					81.123	68.817
0.445564	-47.1627		44	83.304	56.743					81.591	70.53
0.445564	-48.4979		45	83.46	55.497					81.591	70.53
0.445564	-50.0545		46	83.46	54.407					82.136	69.595
0.222782	-48.2751		47	83.772	55.186					82.759	69.128
0.222782	-46.7185		48	83.927	56.743
-0.22278	-47.831		49	84.395	57.522
-0.44414	-50.0545		50	84.395	56.276
-1.11248	-51.167		51	84.395	55.809
-1.11248	-49.3876		52	83.304	54.251
-1.11248	-48.7207		53	83.927	54.095
0.445564	-46.4957		54	84.239	55.186
-0.44414	-46.273		55	84.55	54.251
-0.8897	-47.831		56	84.55	56.276
-1.33384	-46.4957		57	85.018	55.653
-1.33384	-49.3876		58	85.174	54.251
-2.00218	-48.4979		59	84.083	51.758
-2.22496	-46.4957		60	84.083	50.201
-0.66692	-42.9355		61	84.395	49.578
-0.66692	-40.712		62	85.018	50.512
-1.11248	-39.8223		63	84.55	49.266
-2.00218	-41.1561		64	84.55	49.11
-1.33384	-39.3767		65	84.395	50.201
-1.33384	-39.1539		66	84.395	50.045
-1.11248	-40.712		67	84.55	50.512
-1.11248	-40.4892		68	84.239	49.266
-1.33384	-41.1561		69	84.083	48.487
-0.8897	-39.3767		70	83.772	49.733
-0.66692	-38.2642		71	83.927	51.603
-0.22278	-40.0436		72	84.395	51.603
-0.44414	-42.7142		73	84.083	50.356
-1.11248	-42.7142		74	83.304	51.603
-0.66692	-40.9333		75	84.083	52.693
0.445564	-42.7142		76	83.927	51.914
-0.66692	-44.2708		77	83.927	51.914
-0.44414	-43.1583		78	83.616	52.226
-0.44414	-43.1583		79	83.772	52.226
0	-43.6039		80	84.239	53.316
-0.22278	-43.6039		81	84.862	53.316
-0.8897	-45.1605		82	85.018	52.226
-1.7794	-45.1605		83	84.55	53.939
-2.00218	-43.6039		84	85.174	54.095
-1.33384	-46.0502		85	86.42	55.341
-2.22496	-46.273		86	85.797	52.693
-4.00436	-48.0524		87	85.485	54.407
-3.11466	-44.2708		88	85.485	54.251
-2.6691	-46.7185		89	85.174	55.653
-2.6691	-46.4957		90	84.395	54.874
-2.22496	-48.4979		91	83.304	55.497
-1.11248	-47.3854		92	83.46	56.432
0.445564	-48.2751		93	83.616	56.588
0.222782	-49.6104		94	82.214	55.341
0	-49.8332		95	82.214	54.407
2.00218	-48.0524		96	82.525	55.809
2.00218	-46.7185		97	82.993	55.653
1.55805	-48.7207		98	82.993	56.432
0.8897	-48.4979		99	82.993	55.341
0.8897	-49.6104		100	83.304	55.341
0.8897	-48.0524		101	83.46	55.341
0.445564	-48.0524		102	83.616	56.276
0.222782	-48.0524		103	83.927	56.588
0	-49.3876		104	83.927	56.588
-0.44414	-49.8332		105	83.927	56.588
-0.44414	-49.8332		106	84.395	56.588
-0.44414	-49.8332		107	84.395	56.588
-1.11248	-49.8332		108	84.083	56.588
-1.11248	-49.8332		109	83.304	57.055
-0.66692	-49.8332		110	82.058	57.678
0.445564	-50.5001		111	81.902	57.678
2.22496	-51.3898		112	81.902	57.678
2.44775	-51.3898		113	81.902	57.055
2.44775	-51.3898		114	82.214	57.055
2.44775	-50.5001		115	82.214	57.055
2.00218	-50.5001		116	82.37	57.367
2.00218	-50.5001		117	82.525	57.367
1.7794	-50.9457		118	82.525	57.367
1.55805	-50.9457		119	82.37	57.211
1.55805	-50.9457		120	82.37	57.211
1.7794	-50.7229		121	81.902	56.588
1.7794	-50.7229		122	80.344	54.563
2.44775	-49.8332		123	80.656	54.563
4.67271	-46.9413		124	80.033	53.316
4.22715	-46.9413		125	79.877	52.382
5.11685	-45.1605		126	80.656	53.628
5.33963	-43.8266		127	81.279	54.563
4.22715	-45.606		128	81.435	54.874
3.33745	-46.9413		129	81.435	55.341
3.11466	-47.3854		130	81.279	55.341
3.11466	-48.0524		131	81.435	54.874
3.33745	-48.0524		132	81.746	54.874
3.11466	-47.3854		133	81.279	54.563
2.67053	-47.3854		134	82.058	55.341
3.33745	-46.9413		135	82.058	54.251
2.22496	-48.0524		136	81.902	54.407
2.22496	-46.4957		137	81.591	54.718
2.44775	-46.7185		138	80.967	54.407
2.89188	-47.1627		139	80.812	52.693
3.78301	-46.7185		140	80.812	53.005
4.00436	-44.2708		141	81.123	53.784
4.00436	-44.7163		142	81.746	55.341
3.56023	-45.8288		143	82.214	55.809
2.67053	-48.0524		144	83.148	56.276
2.00218	-48.7207		145	82.37	55.03
0.668346	-49.3876		146	82.37	55.03
1.7794	-47.6082		147	82.837	55.186
1.7794	-47.6082		148	82.993	55.341
1.11248	-47.831		149	82.993	53.939
0.8897	-48.0524		150	84.395	54.718
0.8897	-46.0502		151	84.239	56.276
-1.11248	-47.1627		152	82.993	55.03
-0.8897	-49.3876		153	82.525	56.432
0.8897	-47.6082		154	83.927	55.809
1.55805	-49.6104		155	82.993	54.563
-0.44414	-48.7207		156	82.525	54.407
0.8897	-46.9413		157	82.525	54.407
1.55805	-46.7185		158	82.214	53.784
1.55805	-46.7185		159	81.902	53.16
2.00218	-45.8288		160	81.591	52.226
2.44775	-44.9377		161	84.706	55.497
2.89188	-43.6039		162	80.5	54.251
-1.55662	-48.2751		163	79.721	55.341
4.44993	-46.4957		164	78.787	54.874
5.56241	-48.0524		165	78.787	53.628
6.89625	-47.3854		166	78.631	52.537
6.89625	-45.606		167	78.475	52.849
7.11903	-44.048		168	78.475	53.005
7.34181	-44.4936		169	78.787	54.251
7.34181	-44.7163		170	78.787	52.849
6.89625	-46.4957		171	79.254	54.874
6.89625	-44.4936		172	78.942	55.809
6.22933	-47.3854		173	78.787	55.809
6.67489	-48.7207		174	78.631	56.12
6.89625	-48.7207		175	78.319	56.432
7.11903	-49.1648		176	78.319	56.432
7.56459	-49.6104		177	77.696	56.899
7.56459	-49.6104		178	77.385	55.965
8.45429	-50.2773		179	77.385	55.965
8.89843	-48.9435		180	77.229	55.03
8.89843	-48.9435		181	77.385	56.12
9.12121	-47.6082		182	77.696	56.276
8.89843	-49.1648		183	77.696	56.276
8.45429	-49.3876		184	77.696	56.276
8.45429	-49.3876		185	77.696	56.276
8.45429	-49.3876		186	77.696	56.276
8.45429	-49.3876		187	77.696	56.276
8.45429	-49.3876		188	77.696	56.276
8.45429	-49.3876		189	77.696	56.276
8.45429	-49.3876		190	77.696	56.276
8.45429	-49.3876		191	77.54	57.367
8.45429	-49.3876		192	76.761	58.145
8.67707	-50.9457		193	76.606	58.301
9.78956	-52.0567		194	76.294	58.145
10.0109	-52.2795		195	75.515	58.301
10.4565	-52.0567		196	75.359	57.834
11.569	-52.2795		197	75.671	58.924
11.7917	-51.6126		198	76.138	58.301
11.3462	-53.1692		199	76.138	58.145
10.6793	-52.2795		200	76.294	56.12
10.6793	-52.0567		201	76.761	57.211
10.4565	-49.1648		202	77.073	57.678
9.78956	-50.7229		203	76.294	56.432
9.34399	-51.3898		204	76.294	55.653
10.4565	-49.6104		205	76.138	54.874
10.4565	-48.4979		206	76.294	53.628
10.6793	-47.3854		207	76.761	53.939
10.4565	-45.606		208	77.229	55.186
9.78956	-46.0502		209	75.515	54.874
9.12121	-47.831		210	75.827	54.251
11.569	-47.3854		211	76.45	54.095
11.1234	-46.4957		212	76.45	53.472
10.2337	-46.273		213	75.982	54.095
10.2337	-45.3833		214	76.138	53.784
10.902	-46.273		215	75.204	54.095
10.6793	-45.8288		216	75.515	54.718
12.0131	-46.273		217	75.515	54.718
11.569	-47.1627		218	75.671	54.718
11.569	-47.1627		219	75.827	54.718
11.3462	-47.1627		220	76.138	54.874
11.1234	-47.1627		221	76.138	54.874
10.6793	-47.3854		222	76.138	54.874
10.6793	-47.3854		223	76.138	54.874
10.6793	-47.3854		224	76.294	54.874
10.6793	-47.3854		225	76.761	55.186
10.4565	-47.3854		226	77.696	55.809
9.78956	-47.831		227	77.696	55.809
8.45429	-48.7207		228	75.982	55.965
8.45429	-48.7207		229	76.45	56.12
10.902	-48.9435		230	78.163	55.965
10.2337	-49.1648		231	77.229	55.809
7.78737	-48.9435		232	77.229	55.809
9.12121	-48.7207		233	76.606	55.965
9.12121	-48.7207		234	76.606	56.276
10.0109	-48.9435		235	76.45	56.276
10.0109	-49.3876		236	76.45	56.276
10.2337	-49.3876		237	76.294	56.276
10.2337	-49.3876		238	75.671	55.965
10.4565	-49.3876		239	75.671	55.965
11.3462	-48.9435		240	75.515	55.965
11.3462	-48.9435		241	75.515	55.965
11.569	-48.9435		242	75.515	55.965
11.569	-48.9435		243	75.204	56.12
11.569	-48.9435
12.0131	-49.1648
[truncated: 212 more columns]
