# Supplementary material for: Amoeboid-like migration ensures correct horizontal cell layer formation in the developing vertebrate retina
Source: eLife. 2022 May 31;11:e76408. doi: 10.7554/eLife.76408 (PMC9208757; doi:10.7554/eLife.76408)
Supplement: Figure 4—source data 2. [file elife-76408-fig4-data2.xlsx]

## Sheet: Figure 4F
Figure 4F'
	Utrophin intensity	Utrophin intensity	Utrophin intensity	Utrophin intensity
cell length (microns)	t19 (0:00)	t39 (1:40)	t57 (3:10)	t66 (4:00)
0	205.467	211.761	207.311	229.822
0.23446	203.074	211.728	205.706	225.182
0.46892	202.429	213.094	203.248	222
0.70338	202.991	214.517	201.887	222.691
0.93784	204.524	215.55	202.871	226.856
1.1723	206.566	215.517	205.012	230.761
1.40676	206.104	213.683	206.706	230.729
1.64122	202.317	211.628	208.721	226.85
1.87569	199.077	211.217	212.012	221.728
2.11015	199.322	212.672	214.851	217.249
2.34461	200.583	214.528	215.523	214.73
2.57907	199.744	215.15	214.344	214.602
2.81353	197.899	214.5	212.148	216.172
3.04799	197.407	213.333	209.765	217.92
3.28245	198.575	212.206	208.125	218.987
3.51691	201.533	211.678	207.812	219.33
3.75137	205.246	211.583	208.715	218.258
3.98583	207.067	211.506	209.901	215.465
4.22029	205.912	211.789	210.219	213.525
4.45475	202.438	212.833	209.26	214.178
4.68921	198.945	214.644	208.274	216.58
4.92367	198.498	216.656	208.701	219.599
5.15813	200.897	217.428	210.257	224.167
5.39259	203.468	216.439	211.005	231.121
5.62706	204.572	215.15	209.82	239.914
5.86152	205.047	214.6	207.742	250.474
6.09598	205.482	214.494	205.702	262.995
6.33044	204.914	213.817	204.199	277.818
6.5649	203.906	211.906	203.709	295.069
6.79936	203.958	209.822	204.542	314.49
7.03382	205.26	209.511	206.368	335.725
7.26828	206.804	210.833	208.588	357.408
7.50274	207.613	211.611	209.955	378.521
7.7372	206.708	210.972	210.169	399.667
7.97166	205.184	210.756	211.057	424.176
8.20612	204.597	211.878	214.163	454.258
8.44058	203.915	212.939	218.611	487.787
8.67504	202.481	213.256	223.098	518.222
8.9095	202.451	212.922	227.154	540.415
9.14396	204.862	212.017	230.097	551.181
9.37843	207.391	211.067	231.034
9.61289	208.208	210.8	230.15
9.84735	207.348	210.572	228.364
10.0818	206.855	209.95	226.617
10.3163	207.246	209.867	225.004
10.5507	207.139	210.444	224.407
10.7852	207.221	210.967	226.051
11.0197	208.189	211.378	231.446
11.2541	209.736	211.594	239.928
11.4886	211.136	211.289	248.987
11.723	210.738	210.933	257.862
11.9575	206.815	210.394	268.925
12.192	203.398	209.322	283.724
12.4264	203.736	208.539	302.205
12.6609	207.153	209.078	321.772
12.8953	211.413	210.494	339.048
13.1298	216.103	211.078	354.475
13.3643	219.741	211.639	371.321
13.5987	221.5	214.411	391.362
13.8332	223.009	218.683	412.506
14.0676	224.09	220.822	432.596
14.3021	222.633	220.039	451.259
14.5366	218.989	219.7	466.768
14.771	216.96	221.378	477.41
15.0055	219.237	223.228	480.645
15.2399	222.163	223.439
15.4744	221.807	223.339
15.7089	219.88	225.511
15.9433	219.126	230.028
16.1778	220.245	234.994
16.4122	222.024	239.178
16.6467	223.704	242.706
16.8812	226.268	247.061
17.1156	228.193	253.272
17.3501	227.758	260.783
17.5845	227.42	269.094
17.819	228.306	279.417
18.0535	229.145	294.911
18.2879	229.32	316.867
18.5224	230.04	342.628
18.7569	230.683	370.772
18.9913	231.274	405.056
19.2258	232.291	453.256
19.4602	234.207	521.206
19.6947	239.136	600.306
19.9292	247.984	656.822
20.1636	254.451
20.3981	258.458
20.6325	262.721
20.867	267.605
21.1015	273.141
21.3359	281.634
21.5704	290.924
21.8048	297.709
22.0393	302.902
22.2738	309.625
22.5082	324.899
22.7427	352.052
22.9771	386.085
23.2116	422.179
23.4461	457.14
23.6805	490.565
23.915	517.735
24.1494	528.003
24.3839	525.707
24.6184	524.051
24.8528	525.156
25.0873	527.48
25.3217	536.756
25.5562	556.87
25.7907	583.298
26.0251	607.246
26.2596	615.005

## Sheet: Figure 4-figure supplement 1D
Figure 4-figure supplement 1D
TIME (MIN)	BACK-CENTER DISTANCE (MICRON)
0	-7.62
5	-8.558
10	-9.261
15	-12.016
20	-12.25
25	-10.961
30	-10.141
35	-8.851
40	-8.616
45	-7.034
50	-7.562
55	-7.503
60	-6.917
65	-7.092
70	-7.972
75	-7.972
80	-8.558
85	-8.44
90	-8.44
95	-9.261
100	-9.555
105	-12.074
110	-11.254
115	-9.906
120	-9.378
125	-8.968
130	-7.033
135	-7.737
140	-11.196
145	-12.661
150	-13.716
155	-15.591
160	-15.298
165	-18.405
170	-15.005
175	-16.06
180	-8.792
185	-6.096
190	-5.568
195	-6.507
200	-5.745
205	-5.334
210	-5.744
215	-4.806

## Sheet: Figure 4-figure supplement 1E
Figure 4-figure supplement 1E
	Utrophin intensity
Cell Length (mocron)	T1	T2	T3	T4	T5	T6	T7	T8	T9	T10	T11	T12	T13	T14	T15	T16	T17	T18	T19	T20	T21	T22	T23	T24	T25	T26	T27	T28	T29	T30	T31	T32	T33	T34	T35	t36	T37	T38	T39	T40	T41	T42	T43	T44	T50	T51	T52	T53	T54
0	199.507	201.896	203.417	204.939	200.45	208.072	202.322	210.345	215.167	208.333	219.3	239.267	232.333	208.567	217.767	208.667	207.233	210.633	205.467	205.167	201.4	203.1	205.9	194.733	200.533		211.478	203.106	202.972	207.167	205.65	205.25	215.65	212.133	211.067	204.094	211.67	221.357	211.761	213.944	215.989	213.23	207.192	210.052	218.563	211.595	213.469	200.796	193.606
0.23446	199.498	198.323	205.552	204.211	200.236	204.163	205.453	210.054	214.198	213.668	221.228	238.161	235.559	210.816	219.001	211.817	206.3	211.765	203.074	206.299	201.299	204.425	205.075	194.933	197.8	198.667	210.05	202.467	204.35	206.733	203.033	205.233	215.117	211.445	212.567	206.512	210.929	221.307	211.728	210.728	216.072	214.364	208.395	210.545	219.986	216.33	217.313	201.366	193.283
0.46892	200.254	198.25	204.684	204.88	199.632	199.87	204.869	208.086	214.269	218.996	222.389	241.318	236.617	213.224	217.82	210.382	205.967	210.983	202.429	205.746	201.4	205.4	203.183	198.467	198.867	197.8	206.233	201.6	205.206	207.524	201.917	204.25	213.1	209.272	214.154	207.756	208.653	221.543	213.095	208.556	215.489	214.827	210.644	212.338	223.08	221.334	220.281	201.132	195.411
0.70338	199.417	199.985	202.424	203.929	199.365	199.643	202.251	205.192	213.291	220.417	223.712	244.423	234.8	213.182	215.956	205.871	205.2	209.058	202.991	204.286	202.212	205.043	202.395	200.467	203.133	195.667	203.089	201.406	204.506	208.727	202.25	202.767	211	207.931	213.248	206.558	206.98	222.23	214.517	207.833	213.894	213.622	212.594	215.08	229.565	225.921	221.104	200.759	198.333
0.93784	198.848	199.828	203.012	205.075	199.245	201.324	201.224	203.441	211.662	217.235	223.986	249.148	233.442	212.568	214.074	200.774	204.667	207.005	204.524	203.147	204.418	203.701	203.823	200.067	207	192.6	201.461	201.15	202.267	208.709	203.5	202.033	210.15	207.733	211.426	205.095	207.205	222.494	215.55	208.267	211.772	212.648	213.983	217.695	238.799	229.172	221.657	199.783	199.722
1.1723	202.143	198.091	204.93	208.934	198.862	200.242	202.208	202.422	210.676	211.578	221.657	250.195	232.755	211.802	212.298	197.712	206	205.229	206.565	202.765	205.93	200.657	205.388	197.4	207.6	191.133	201.133	200.644	200.9	207.847	205.417	202.817	210.617	207.41	210.59	205.19	208.157	221.467	215.517	209.311	210.061	212.633	216.1	218.808	248.251	230.965	224.153	198.27	199.567
1.40676	205.546	195.77	203.813	213.648	199.32	197.672	201.862	202.589	210.97	208.117	218.63	246.971	231.667	209.804	212.009	197.924	207.067	205.102	206.104	202.484	205.273	197.392	204.529	195	205.667	193.867	201.411	201.1	200.889	206.917	207.417	204.417	210.933	207.099	210.015	205.968	209.599	219.987	213.683	210.106	209.294	213.453	218.234	218.756	255.446	233.221	227.815	196.6	198.389
1.64122	204.591	195.556	200.461	216.03	200.803	197.34	199.066	205.271	211.098	209.324	216.533	243.776	230.468	207.469	211.781	199.989	206.583	205.984	202.317	202.415	204.341	197.265	201.763	194	202.867	196.933	201.794	201.278	201.872	205.331	208.5	205.633	209.8	207.067	209.142	206.508	210.592	219.141	211.628	209.728	209.172	215.226	220.075	218.598	258.98	236.811	230.194	195.453	196.417
1.87569	205.276	199.182	200.064	212.684	200.981	198.765	198.997	206.067	210.231	211.251	214.635	241.102	228.595	205.839	210.846	203.549	206.05	204.653	199.077	204.533	205.069	200.174	199.849	193.533	200.267	199.8	200.511	200.25	202.856	203.466	208.917	205.85	207.633	206.686	209.156	206.308	210.293	218.069	211.217	208.317	209.278	218.192	221.681	219.177	258.981	240.521	229.819	196.133	194.622
2.11015	208.183	200.045	203.183	209.078	200.638	201.301	202.243	203.785	209.952	209.943	214.002	238.703	226.856	205.542	210.972	208.021	205.433	201.847	199.322	208.537	207.604	203.056	200.922	193.6	195.733	200.533	198.106	198.944	202.483	202.733	208.117	205.167	205.5	206.194	210.028	205.967	209.409	216.322	212.672	207.722	209.489	222.041	223.529	221.01	256.978	242.353	227.863	197.9	194.194
2.34461	209.726	198.663	204.959	211.564	202.296	203.953	203.972	202.816	209.982	206.686	214.279	237.001	226.228	206.078	209.821	211.298	203.667	200.703	200.583	210.587	209.583	204.834	203.837	196.933	192.533	198.467	196.617	198.778	201.617	202.451	205.667	204.733	204.317	206.922	209.555	205.915	208.5	214.946	214.528	208.539	209.917	225.401	226.34	223.124	254.368	242.304	227.021	200.432	194.833
2.57907	208.852	198.667	204.14	214.758	205.304	204.647	202.766	202.254	209.77	204.187	212.044	236.859	225.262	206.124	207.91	213.101	202.367	200.546	199.744	209.247	207.628	206.18	205.044	200.733	193.533	197.533	196.667	199.461	201.056	201.713	203.567	205.2	204.283	207.998	207.891	205.475	208.021	215.168	215.15	209.828	210.389	227.537	227.941	224.038	251.272	241.119	228.401	202.655	196.55
2.81353	211.328	200.526	203.692	211.179	206.97	203.185	200.585	200.933	210.767	204.743	208.581	238.753	223.513	204.859	209.904	215.794	203.45	200.729	197.899	207.903	203.147	206.202	203.099	201.667	195.2	198.467	197.683	200.183	201.389	202.039	203.183	205.867	204.483	207.562	207.01	204.604	207.821	216.126	214.5	210.006	210.95	227.815	226.151	221.69	247.758	239.572	229.774	202.575	198.756
3.04799	212.826	202.651	204.887	207.061	206.031	201.622	199.155	201.685	212.242	208.031	207.876	238.751	220.423	202.339	213.823	217.241	206.233	202.14	197.407	207.452	200.482	204.608	201.541	200.267	195.733	198.6	199.883	200.595	202.805	204.105	203.683	205.533	204.3	206.155	208.588	204.027	207.305	216.476	213.333	209.033	212.05	226.16	222.044	217.887	244.33	237.146	229.243	200.803	200.744
3.28245	213.367	201.149	204.541	206.969	203.566	201.536	198.16	203.797	211.687	209.896	209.989	234.9	218.074	202.184	214.19	215.788	208.517	203.693	198.575	205.204	200.85	203.563	202.621	199.267	196.467	197.133	202.539	200.422	204.522	205.418	203.783	204.583	204	204.72	210.128	204.349	205.557	215.937	212.206	208.494	213.489	224.351	219.488	215.226	242.884	234.656	227.947	198.375	201.678
3.51691	212.75	200.135	202.012	206.127	201.472	201.81	198.121	205.007	209.867	209.733	213.181	230.012	218.088	206.105	210.725	213.208	208.65	204.299	201.533	203.029	203.413	203.658	203.609	199.867	197	197.6	204.911	199.467	205.328	204.716	203.883	204.683	204.133	203.478	209.205	205.454	204.324	214.665	211.678	209.278	214.578	222.592	220.189	214.286	244.68	233.046	226.422	196.062	202.383
3.75137	214.448	204.127	200.181	204.691	199.767	201.917	198.94	205.161	208.941	208.873	214.243	226.887	218.084	208.431	208.021	209.425	206.9	204.657	205.246	204.647	206.626	203.302	202.441	200.667	197	200.4	206.778	198	204.544	203.794	204.567	206.05	205.133	203.002	207.532	206.199	203.983	212.989	211.583	210.811	214.85	220.596	221.906	214.984	248.667	233.252	225.094	194.442	202.778
3.98583	221.719	208.318	198.532	204.919	198.049	202.179	197.799	204.793	209.441	207.731	211.655	225.846	218.651	206.95	208.246	206.183	204.6	205.217	207.067	207.189	209.13	202.534	199.72	200.8	198	201.533	207.539	196.439	204.328	204.087	204.817	207.083	205.85	203.591	206.459	205.514	203.611	211.589	211.506	211.911	214.7	219.087	222.521	216.799	252.32	234.722	225.242	194.319	202.583
4.22029	229.035	207.554	197.432	203.6	199.039	203.19	195.335	206.138	210.474	207.184	207.569	224.015	219.486	205.572	210.411	206.112	203.55	206.458	205.912	207.293	210.425	202.689	197.803	200.533	199.733	198.4	208.167	196.511	205.6	204.749	203.6	206.383	204.8	205.224	205.268	203.618	202.954	211.506	211.789	212.228	214.967	219.104	221.931	219.198	253.277	237.425	228.878	195.401	202.2
4.45475	229.05	204.977	199.626	200.208	200.815	206.335	196.609	207.103	213.053	207.667	206.825	222.462	218.939	206.165	212.722	208.146	204.2	207.183	202.438	206.684	210.984	203.155	198.007	198.933	201.067	195.467	211.033	198.894	206.428	204.386	202.167	204.6	203.067	207.29	203.845	200.906	202.005	213.765	212.833	212.3	215.228	219.964	220.962	222.278	252.554	242.057	236.331	196.849	201.772
4.68921	224.478	201.155	202.457	200.469	199.312	207.909	201.769	205.079	217.692	209.37	209.56	223.391	218.288	206.442	212.597	208.904	204.683	206.322	198.945	207.462	211.195	202.365	199.274	196.8	200.133	196.067	214.805	201.744	207.422	203.127	202.733	203.133	203.5	208.145	204.027	199.673	200.785	217.97	214.644	213.856	214.656	221.278	219.811	225.051	252.458	248.505	244.897	198.563	201.256
4.92367	230.791	198.233	203.053	203.932	198.286	206.351	203.564	203.313	222.307	209.8	211.587	224.487	216.444	204.406	211.038	208.521	203.633	204.857	198.498	208.646	210.236	201.166	200.707	195.2	198.933	198.667	215.845	203.978	208.167	202.006	204.55	202.05	206.45	207.367	204.745	201.408	200.226	221.056	216.656	217.294	213.428	223.241	219.487	227.622	254.776	256.693	250.658	199.559	201.278
5.15813	238.693	197.886	203.235	206.353	200.979	204.494	202.012	203.532	225.257	209.417	212.198	225.569	213.737	203.954	210.759	208.732	203.167	205.023	200.897	208.676	209.376	201.166	202.182	195.333	199.2	198.733	214	206.072	206.828	201.311	204.683	201.283	208.067	207.429	204.878	202.822	202.153	221.791	217.428	220.967	212.506	225.85	219.389	229.749	259.845	266.903	251.79	200.97	202.689
5.39259	240	202.041	204.062	209.834	203.841	203.027	201.917	203.68	227.586	213.01	211.723	225.538	214.897	207.322	211.735	208.327	204.25	207.176	203.468	207.559	211.123	202.602	203.668	196.067	199.8	197.067	212.861	208	205.217	201.441	202.983	201.65	206.067	209.722	205.56	203.216	204.872	221.622	216.439	223.333	212.756	228.409	218.565	232.011	265.488	279.389	249.989	202.25	205.411
5.62706	240.281	206.694	206.492	212.251	205.674	202.791	201.287	203.488	230.336	217.13	212.132	225.27	217.105	210.159	212.841	206.517	204.917	209.077	204.572	206.203	213.649	204.567	204.837	196.067	200.8	195.2	213.083	208.278	206.05	202.892	202.233	202.833	204.167	212.34	208.464	202.779	205.679	221.411	215.15	224.628	213.983	230.232	218.018	234.482	269.939	289.95	247.257	203.575	209.483
5.86152	237.591	207.65	207.285	209.341	207.439	204.188	198.298	204.226	233	217.13	215.787	226.853	215.133	211.266	210.699	205.542	205.55	208.502	205.047	205.94	213.863	206.518	204.772	196.733	200.533	194.6	213.622	208.211	208.506	205.289	203.25	203.183	204.583	212.909	210.178	202.697	204.72	221.128	214.6	225.806	214.739	230.298	218.308	236.809	274.113	295.678	245.043	204.387	214.033
6.09598	241.207	209.861	203.352	204.72	207.781	206.358	195.958	205.951	235.461	215.783	216.178	228.941	212.454	211.851	206.27	205.693	207.15	205.171	205.482	207.424	213.082	208.095	202.455	197.2	199.6	195.333	214.533	209.583	210.428	207.251	204.2	202.933	204.883	210.448	208.128	203.659	203.433	219.837	214.494	226.433	214.2	227.785	219.369	237.743	279.724	295.56	243.393	203.878	216.8
6.33044	252.069	206.169	201.568	203.622	205.406	207.994	197.824	208.54	236.617	215.756	212.301	229.03	213.641	212.358	204.683	204.502	208.25	202.395	204.914	209.138	213.384	207.669	199.029	196.733	199	197.8	216.228	210.989	210.661	207.755	203.733	203.15	205.25	207.47	206.917	204.76	202.057	218.941	213.817	225.706	213.061	223.281	219.888	238.636	284.321	288.888	242.206	201.84	216.506
6.5649	258.172	203.256	203.09	205.173	201.146	207.192	202.102	210.116	236.582	215.473	211.082	227.112	214.657	212.993	205.106	204.642	207.85	202.8	203.906	208.632	213.772	204.802	196.579	196.933	197.933	200.867	216.833	209.811	210.428	208.143	202.217	203.617	206.717	207.41	207.012	204.594	202.63	218.228	211.906	224.339	212.5	218.795	219.289	239.903	285.084	276.051	241.521	200.379	214.478
6.79936	250.713	204.298	202.821	203.869	198.305	205.985	204.083	209.757	236.643	214.478	212.62	224.749	212.323	211.696	206.351	208.605	208.283	204.275	203.958	207.192	212.825	203.033	197.25	198.2	197.867	202.067	214.644	208.839	211.167	209.757	200.967	204.583	207.083	209.991	206.193	203.468	204.795	216.87	209.822	224.078	213.528	216.021	218.642	240.573	282.755	263.38	241.872	200.691	212.294
7.03382	239.198	204.981	202.681	202.238	199.253	207.939	202.854	211.398	235.41	216.329	214.424	221.493	211.996	209.113	209.517	211.944	209.833	205.302	205.26	208.846	211.199	204.102	201.162	199.067	197.467	201.533	212.872	211.961	211.617	211.543	201.133	206.733	205.183	211.305	202.861	202.2	207.069	214.863	209.511	225.183	215.739	215.237	219.366	241.069	282.168	257.344	242.387	201.915	210.683
7.26828	233.239	208.433	202.054	204.435	202.077	213.3	201.527	216.12	231.787	220.445	215.771	220.378	215.033	208.371	213.103	213.216	209.467	207.244	206.804	213.992	209.383	204.774	204.804	198.333	195.6	201.067	212.839	216.022	211.606	212.734	202.417	209.483	203.567	210.068	199.045	202.39	208.692	214.354	210.833	225.9	217.772	216.188	220.489	243.108	285.911	256.09	243.312	203.632	210.628
7.50274	228.567	214.047	203.312	204.75	202.834	221.147	202.653	218.766	227.769	223.521	217.739	220.935	217.833	209.246	215.484	214.367	207.7	210.092	207.613	218.005	208.586	203.881	205.347	196.533	193.4	201.333	212.472	217.3	213.278	214.01	203.583	210.917	203.683	208.394	198.022	204.645	208.624	213.924	211.611	224.694	218.283	217.84	220.874	246.59	291.844	254.42	244.568	205.291	212.028
7.7372	226.448	218.202	206.967	203.104	201.858	230.188	207.915	218.801	224.053	225.343	220.783	218.248	216.08	210.668	218.927	216.278	207.333	212.372	206.708	217.121	209.911	203.749	204.404	194.8	195.467	202.6	212.217	217.533	216.033	215.744	204.317	210.433	204.117	207.28	200.719	208.09	208.247	212.891	210.972	222.417	217.35	220.152	221.611	249.477	297.445	252.092	245.825	206.622	213.467
7.97166	227.589	220.099	208.087	205.799	203.019	235.039	216.77	218.49	221.487	226.338	225.304	213.899	211.485	213.422	222.617	217.785	209.383	212.046	205.184	213.83	210.383	205.935	204.051	193	199.6	200.867	212.272	218.911	218.05	216.927	205.383	210.133	204.717	206.029	204.738	209.833	208.953	211.441	210.756	220.572	216.206	222.888	222.73	250.891	301.033	251.632	246.292	207.085	212.672
8.20612	225.763	225.025	206.427	208.444	206.08	234.018	221.932	218.711	222.511	227.933	227.378	212.526	208.742	217.367	220.78	216.916	211.783	210.341	204.597	213.342	208.132	209.227	204.639	193.333	200.067	197.133	210.994	219.678	218.989	217.029	207.267	211.033	206.117	204.545	206.677	210.113	210.143	210.041	211.878	219.472	215.044	225.446	223.824	253.094		252.531	247.362	207.332	210.161
8.44058	221.352	230.523	206.844	207.953	208.482	232.148	220.327	220.378	225.898	230.676	227.112	213.677	208.649	218.267	218.311	216.206	211.9	210.492	203.915	214.876	206.382	211.497	205.448	193.8	198.667	196.6	209.606	217.556	218.8	216.47	208.333	211.85	207.55	204.011	206.757	209.006	210.043	208.469	212.939	218.589	214.111	227.549	224.534	258.547		254.327	250.294	207.81	207.978
8.67504	219.006	230.735	207.357	205.449	208.826	232.129	219.797	223.775	227.561	233.028	226.955	215.605	211.089	216.186	220.493	216.315	210.533	212.274	202.481	215.014	207.803	210.617	205.008	194.733	198.467	199.867	210.706	213.956	216.878	215.685	206.767	212.75	208.167	205.144	206.228	207.795	208.282	207.404	213.256	217.494	214	229.142	224.918	266.266		257.033	253.523	209.388	207.661
8.9095	222.028	228.979	207.663	203.248	208.186	234.864	222.979	227.018	227.094	234.668	226.532	216.7	212.453	215.711	224.3	215.324	209.9	212.44	202.451	213.684	210.895	207.26	203.016	195.733	198.467	204.467	213.117	213.222	214.311	213.692	203.8	214.333	208.75	208.082	206.26	206.736	206.802	207.494	212.922	216.028	214.583	231.2	224.694	272.976		260.621	255.648	210.797	208.861
9.14397	226.45	226.872	209.411	202.841	207.437	239.051	224.051	231.026	226.846	235.499	224.947	216.533	209.428	217.631	227.053	214.828	210.883	211.312	204.862	212.135	212.643	206.154	201.512	196	197.867	208.8	215.472	214.994	211.839	210.604	202	215.083	209.65	210.903	207.533	204.446	204.619	208.406	212.017	214.65	215.211	233.793	223.25	278.952		263.865	258.242	210.718	209.183
9.37843	229.58	227.845	211.733	204.988	207.919	241.584	225.293	235.338	226.759	234.494	223.109	214.054	206.676	217.511	228.804	217.353	212.233	211.699	207.391	211.442	214.138	207.985	201.683	195.8	196.467	210.6	217.861	215.528	210.911	208.864	202.8	213.067	209.467	211.384	208.351	202.318	202.359	209.383	211.067	214.106	214.928	235.417	222.25	283.998		267.076	261.963	210.1	208.033
9.61289	232.291	229.207	213.011	209.259	213.102	240.019	228.416	238.56	227.622	233.087	221.989	210.925	208.281	216.239	232.291	220.629	212.133	213.995	208.208	212.442	217.084	210.401	202.529	195.533	196.333	209.4	218.672	214.067	211.256	209.902	205.517	209.067	208.367	210.603	207.074	201.663	202.064	210.017	210.8	214.717	213.856	235.662	223.866	288.435		272.054	266.394	210.161	206.022
9.84735	239.576	232.412	212.322	210.483	219.115	234.693	232.13	243.595	231.04	234.953	223.727	211.071	209.33	217.963	235.131	220.917	211.767	216.438	207.348	215.087	218.614	212.204	202.502	196.533	197.333	208	217.689	213.894	211.906	212.812	208.25	205.533	208.233	210.227	205.268	202.03	203.579	210.593	210.572	215.394	213.928	235.771	227.503	295.294		279.973	273.664	210.787	204.972
10.0818	250.404	234.513	211.104	208.057	221.627	230.152	236.118	250.693	233.697	240.637	228.531	214.9	207.557	220.281	235.192	220.257	214.333	217.884	206.856	217.77	217.073	213.36	201.741	196.267	197.867	208	216.861	216	212.206	215.784	209.683	203.867	209.083	210.32	206.034	200.914	205.334	211.291	209.95	214.95	216.111	237.261	232.426	307.255		291.601	283.099	210.575	204.972
10.3163	258.728	238.455	214.415	208.115	223.233	229.027	237.633	257.92	232.823	243.234	233.358	218.628	208.377	221.348	233.597	219.997	218.8	217.446	207.246	219.012	214.641	214.145	201.322	194.867	196.267	208.267	217.506	218.65	212.706	217.476	209.933	204.033	209.417	209.957	209.889	200.125	206.857	211.67	209.867	213.933	218.128	241.124	238.681	322.584		306.46	290.965	209.795	206.028
10.5507	257.711	245.767	221.799	213.384	226.586	230.393	236.037	262.141	231.876	240.419	237.419	220.333	210.477	223.597	232.644	219.865	221.733	214.843	207.139	219.129	213.257	214.446	201.061	195.867	194.533	210.867	220	220.394	212.467	218.951	209.783	205.617	209.483	209.141	211.804	201.21	207.279	212.343	210.444	213.783	218.022	247.768	245.315	339.546		322.659	295.894	210.366	206.983
10.7852	252.42	246.296	225.087	218.153	229.359	233.68	235.488	258.834	231.438	237.792	238.354	220.376	208.14	228.389	231.693	219.326	222.183	211.101	207.221	218.305	212.772	214.299	201.562	199.067	194.467	214.933	224.933	221.45	212.078	219.912	209.883	208.467	210.083	208.881	209.42	203.12	206.083	212.781	210.967	215.4	217.433	256.541	251.548	357.042		334.348	300.927	212.228	207.883
11.0197	247.672	246.035	223.913	220.478	230.272	235.417	239.678	250.938	232.178	235.146	237.919	220.193	204.936	234.455	230.775	218.537	222.567	208.946	208.189	217.487	212.638	213.987	202.519	200.867	195.6	217.533	230.089	222.667	212.956	220.174	210.117	210.983	210.317	209.707	207.359	202.79	204.54	212.604	211.378	217.744	218.172	264.756	259.741	374.564			311.401	213.872	208.561
11.2541	246.811	252.71	226.329	222.234	231.594	233.637	242.96	244.866	234.79	232.408	236.574	218.915	207.723	240.389	232.289	218.683	225.033	210.052	209.736	217.416	213.649	214.21	202.976	201.333	196.333	216.267	232.222	222.089	214.822	221.03	210.55	210.217	209.383	210.098	207.874	201.258	203.68	211.852	211.594	218.728	219.183	272.605	270.11	388.778			333.033	214.138	207.722
11.4886	249.424	258.822	230.416	223.784	231.577	231.139	240.89	240.945	237.427	230.929	233.093	216.6	213.292	244.783	232.867	220.314	228.15	213.595	211.136	216.787	214.945	215.835	203.92	201.8	197.8	213.8	230.022	219.711	216.372	222.001	211	206.2	208.1	207.96	207.997	200.387	203.206	210.193	211.289	217.994	219.033	282.77	281.538	391.359			368.216	214.711	206.033
11.723	255.015	258.896	229.421	222.99	230.294	230.102	235.757	236.327	237.657	228.341	230.897	214.577	215.215	247.099	233.278	222.189	230.05	218.365	210.738	215.516	215.163	218.083	205.504	199.333	199.933	214.267	226.278	218.239	217.944	222.566	210.85	202.433	207.9	204.627	207.283	200.107	203.112	208.694	210.933	217.211	217.728	294.855	294.157				412.006	217.077	205.733
11.9575	259.685	254.328	226.543	223.577	232.156	230.695	230.307	232.015	236.929	224.842	231.888	214.107	214.193	247.821	234.294	223.058	229.717	223.198	206.815	214.131	214.213	220.286	206.248	196.267	201.933	218.533	223.283	219.167	219.417	223.562	210.267	201.867	208.3	203.346	209.327	200.258	203.078	208.233	210.394	217.267	216.572	305.628	310.102				443.401	221.433	207.4
12.192	262.574	250.305	226.896	230.951	234.418	232.595	225.463	232.053	236.13	221.998	231.206	214.121	213.669	247.79	233.239	223.2	226.4	226.044	203.398	212.991	213.807	221.92	206.494	197.933	203.6	222.933	221.078	220.367	221.883	225.115	209.067	204.533	207.967	204.891	212.462	199.998	204.473	208.772	209.322	217.389	216.361	313.848	330.907					226.89	209.65
12.4264	269.533	250.794	230.9	242.006	233.397	234.749	221.254	234.995	235.082	220.655	227.355	213.485	213.414	246.117	231.593	222.307	223.167	225.501	203.736	212.52	213.747	223.042	207.448	201.533	204.867	222.933	219.55	220.367	223.567	225.684	207.117	208.033	207.45	207.272	212.239	199.063	205.911	209.593	208.539	217.439	216.8	320.782	354.93					231.748	211.45
12.6609	280.461	250.352	234.495	251.325	232.948	236.685	220.155	237.487	235.614	218.271	227.03	211.977	214.78	242.667	233.583	220.745	224.233	222.768	207.154	213.859	212.621	223.03	207.987	202.067	204	220.867	219.456	219.483	221.789	225.729	206.117	210.617	208.5	208.782	209.469	199.001	205.05	209.956	209.078	218.144	217.222	327.094	383.209					235.649	213.372
12.8953	289.559	250.093	238.657	252.738	232.095	240.606	221.576	235.064	234.724	216.175	231.359	211.616	217.246	239.396	234.492	219.934	226.75	221.523	211.413	216.157	211.505	221.674	208.238	200.267	201.867	218.933	221.228	219.444	218.445	227.076	207.8	211.6	210.383	208.936	207.47	200.121	203.431	209.176	210.494	218.539	216.689	333.702	415.332					239.316	215.728
13.1298	297.846	247.54	245.18	244.965	230.816	244.349	224.153	230.506	229.122	217.309	232.482	214.494	218.144	236.852	234.465	219.611	225.433	221.953	216.103	217.361	212.49	219.666	209.068	200.333	202.267	217.533	222.022	220.717	217.217	229.438	210.367	211.017	210.05	208.357	207.58	202.033	203.069	207.622	211.078	217.389	215.072	342.032	443.479					243.811	218.272
13.3643	313.92	245.231	247.611	241.182	229.678	242.93	227.987	230.482	222.078	219.718	230.68	218.02	218.148	235.806	241.327	219.674	221.633	222.488	219.741	216.799	214.518	217.828	211.176	201.867	205.067	217.467	222.106	221.711	218.583	232.44	211.533	210.45	208.25	208.248	208.052	204.525	205.636	207.27	211.639	215.689	213.533	350.716	452.446					249.809	220.506
13.5987	328.389	250.943	241.755	246.587	230.014	241.544	228.151	233.501	219.792	221.541	229.839	220.359	219.298	237.395	250.597	220.966	220.433	223.867	221.5	217	214.05	216.667	213.017	203.333	205.333	219.733	222.85	220.867	220.467	235.093	212.033	211.133	208.283	209.671	207.471	205.553	207.604	208.774	214.411	214.728	212.878	356.021						258.149	222.728
13.8332	330.919	258.154	236.649	250.418	233.145	241.538	229.422	234.825	218.818	221.961	230.579	223.182	222.033	237.555	251.167	222.262	222.35	225.712	223.01	218.249	212.167	215.719	213.352	203.533	202.133	222.333	222.956	218.578	223.233	236.187	212.533	212.05	209.767	210.732	207.72	204.876	207.125	210.541	218.683	213.9	213.4	357.531						269.607	225.961
14.0676	329.098	264.725	240.332	251.186	239.24	240.429	234.251	233.22	216.267	222.662	230.438	224.064	224.057	238.541	244.178	222.806	223.85	226.37	224.09	218.207	212.71	215.395	213.451	202.8	200.4	224.267	222.306	217.305	225.8	236.625	212.45	213.167	210.7	209.959	210.511	203.587	206.129	212.204	220.822	212.811	216.011	358.699						283.035	230.2
14.3021	322.787	264.074	246.034	255.467	244.874	240.053	237.073	230.738	217.608	222.533	230.955	222.837	224.4	243.099	239.229	224.014	222.583	225.672	222.632	217.6	215.555	216.227	215.451	201.933	202.2	225.4	223.017	218.694	228.094	237.359	212.35	215.433	210.617	208.209	211.164	202.794	205.937	214.737	220.039	212.272	220.539	360.458						297.715	235.656
14.5366	319.657	260.551	247.952	257.146	245.851	241.079	238.522	230.265	224.209	219.953	229.755	221.725	224.744	244.04	239.816	226.61	220.667	223.717	218.988	217.926	219.209	218.236	217.24	202.4	205.333	226.4	225	222	229.644	237.82	213.5	217.35	209.983	207.361	208.569	202.378	206.562	216.17	219.7	212.656	225.028							315.884	241.906
14.771	321.037	260.08	249.421	253.367	244.504	241.45	239.814	233.816	231.733	219.093	226.987	220.849	226.63	239.292	241.656	229.19	222.533	220.812	216.96	219.472	223.401	220.897	216.842	203.067	211.667	226.8	226.478	225.644	230.039	238.394	215.633	217.317	209.933	208.262	205.859	203.352	207.945	214.978	221.378	213.511	227.706							340.319	247.689
15.0055	329.07	262.262	252	249.767	240.274	241.743	241.81	239.826	238.778	220.559	229.028	221.733	230.45	237.102	241.609	232.322	228.217	218.331	219.237	221.515	226.483	223.308	216.877	202.6	216.867	227.533	228.506	227.161	230.317	240.956	217.267	217.067	211.217	209.451	205.001	205.516	208.245	212.719	223.228	215.428	229.361							371.555	252.133
15.2399	342.933	264.931	253.012	250.263	235.484	244.524	245.702	241.494	242.66	220.946	233.851	225.905	234.459	239.611	239.963	236.08	232.583	217.781	222.163	223.037	226.824	225.257	218.286	203.067	217.133	229.4	231.222	227.228	232.222	245.705	217.067	218.7	213.433	210.127	205.14	208.036	206.309	212.424	223.439	219.189	232.706							411.562	256.722
15.4744	358.05	266.362	253.034	254.925	236.683	246.763	251.488	238.325	242.754	222.666	236.296	227.556	235.479	241.904	237.698	238.909	233.383	219.493	221.807	222.675	226.315	226.163	218.664	206.267	213.533	231.133	233.194	229.672	235.95	248.888	214.983	220.317	215.35	210.825	206.837	208.731	204.223	213.685	223.339	223.206	239.111							466.163	262.111
15.7089	375.004	271.874	253.561	256.002	240.1	247.359	253.261	236.214	240.643	225.434	236.013	224.268	233.981	242.08	240.098	242.261	232.333	220.673	219.88	221.93	226.959	227.493	216.834	209.4	210	232.733	234.528	236.594	238.456	249.588	213.767	219.683	215.65	211.495	209.963	206.902	203.197	214.461	225.511	226.078	248.478							542.687	268.033
15.9433	382.031	277.628	251.447	253.031	245.625	249.554	250.192	239.052	240.192	227.799	235.244	221.883	232.754	241.074	246.19	248.047	229.767	219.676	219.126	223.025	227.496	230.078	215.922	209.467	208.8	235	236.744	243.239	240.378	250.246	215.933	218.183	214.65	211.238	210.83	204.509	203.149	214.261	230.028	229.411	260.161							643.845	274.394
16.1778	384.019	286.44	246.588	250.29	251.339	255.65	247.336	243.888	241.72	230.695	233.857	227.108	231.564	240.858	251.543	255.741	228.017	217.315	220.245	224.873	225.401	233.582	218.423	208	208.533	236.467	239.05	246.055	244.494	252.29	219.983	217.933	214.133	209.983	207.322	204.235	203.419	214.598	234.994	234.817	272.128							750.795	282.3
16.4122	389.698	303.724	245.319	251.192	252.257	263.405	245.132	245.037	243.633	236.256	232.911	234.919	230.985	237.72	253.388	262.279	228.933	216.409	222.024	227.355	221.337	236.186	221.836	208	206.8	236.8	240.606	247.944	249.872	256.237	223.067	219.55	214.85	208.646	204.558	205.819	202.695	214.53	239.178	241.533	282.456							825.334	293.445
16.6467	390.304	319.62	248.393	257.52	249.939	267.876	241.283	241.267	245.726	239.632	237.827	239.822	231.365	234.796	252.911	265.888	230.133	219.329	223.704	230.022	219.85	236.219	223.872	209.267	206	238.733	242.506	250.633	255.772	260.489	224.967	221.683	217.067	207.632	205.16	206.657	202.366	214.222	242.706	247.822	292.183							826.737	307.122
16.8812		321.136	252.388	257.547	244.058	270.492	238.844	238.024	246.71	242.202	245.244	238.512	233.32	236.133	250.489	267.092	231.55	224.415	226.268	230.641	220.965	235.606	225	210.267	207.8	239.467	244.711	253.789	264.994	264.682	227.533	223.633	220.633	208.048	207.336	206.864	205.199	214.676	247.061	252.978	304.383								320.911
17.1156		320.909	253.477	251.077	240.675	270.405	243.314	238.736	244.302	244.762	247.216	233.438	234.043	236.002	248.881	268.217	233.867	228.986	228.192	230.546	224.507	236.768	225.272	211.933	209.533	238.533	247.044	259.25	279.789	266.402	232.1	225.817	224.383	210.463	208.482	207.391	209.339	216.546	253.272	257.839	319.706								333.145
17.3501		333.936	248.684	249.716	242.401	264.748	252.7	238.591	241.878	249.63	247.288	229.144	229.545	233.747	251.351	273.143	235.533	231.363	227.758	230.745	228.695	240.063	227.432	215.4	210.733	240.867	251.05	267.055	297.7	264.858	239.25	228.533	226.783	212.997	209.906	207.171	211.297	218.317	260.783	264.295	335.361								344.384
17.5846		346.935	244.452	252.74	244.619	261.453	255.658	236.649	244.419	253.391	249.229	226.297	224.867	235.002	257.717	281.473	238.267	231.706	227.42	231.589	230.945	244.279	232.825	219.933	212.867	248	256.894	272.678	315.544	264.235	248.017	232.233	226.9	213.982	212.315	207.46	212.185	219.85	269.094	275.317	350.456								355.567
17.819		350.327	245.031	253.443	247.508	264.894	249.965	236.283	248.24	254.078	248.241	226.911	225.56	237.432	263.649	288.47	242.483	230.933	228.306	232.57	230.759	247.294	238.278	226.2	215.933	254.067	263.511	275.483	333.716	266.396	255.467	236.433	226.283	215.346	212.302	209.484	214.438	222.072	279.417	293.489	368.467								365.433
18.0535		354.152	248.741	250.819	250.239	271.572	244.983	239.013	252.129	254.178	246.267	227.96	228.373	236.495	270.275	292.776	245.217	229.143	229.145	233.403	229.791	247.932	241.937	230.2	219.733	258.6	270.517	283.028	352.366	271.51	258.1	240.033	228	218.525	208.957	210.994	217.285	225.485	294.911	318.361	393.094								375.033
18.2879		365.906	253.242	252.104	250.684	277.264	245.399	242.804	257.372	257.907	248.746	228.072	228.578	237.546	282.472	296.364	249.867	228.342	229.32	235.689	230.875	247.551	244.458	229.333	222.533	269.333	278.133	296.283	372.178	277.623	254.617	241.817	232.033	222.243	207.539	210.677	218.289	229.533	316.867	348.811	423.928								389.856
18.5224		386.406	260.435	261.102	249.448	282.453	250.073	249.201	261.337	264.219	254.691	226.679	227.513	244.128	294.383	299.063	259.017	229.386	230.04	239.345	231.791	249.851	247.676	227.733	223.2	285.067	284.917	312.539	400.355	283.248	247.783	241.017	236.75	225.346	210.148	212.023	217.905	233.565	342.628	388.828	454.911								420.111
18.7569		409.944	266.046	269.627	247.985	286.991	257.344	257.137	265.61	269.41	261.841	225.019	227.219	252.195	299.069	302.331	268.067	231.087	230.683	242.229	233.359	255.296	251.289	228.6	222.4	303.933	289.539	331.633	434.611	288.216	242.767	239.05	243.2	227.841	213.003	215.223	218.002	238.706	370.772	445.495	473.578								473.912
18.9913		426.345	269.293	272.379	251.61	287.539	264.37	263.323	269.278	276.726	268.6	223.322	229.73	257.608	299.883	309.964	274.017	231.069	231.274	244.492	237.305	261.73	256.195	229.267	221.133	320.267	294.644	350.75	464.639	291.956	242.917	239.367	252.417	227.691	214.096	217.935	218.551	247.387	405.055	518.289									540.373
19.2258		438.174	273.433	274.203	255.732	285.257	268.619	267.622	270.473	288.256	273.347	221.909	235.134	257.893	303.048	321.886	276.9	230.568	232.291	246.251	243.387	270.235	261.546	228.933	222	334.4	305.028	368.833	483.828	294.878	245.817	243.367	260.983	223.831	214.518	218.706	220.394	261.343	453.256	591.411									590.567
19.4602		446.201	271.705	282.234	256.418	287.542	273.623	271.039	271.29	299.319	279.297	223.391	240.138	256.99	308.298	335.401	277.883	232.531	234.207	247.227	250.632	282.193	267.842	229.933	225.267	350.733	320.133	388.928	494.122	299.058	248.817	249.333	264.2	220.467	214.086	219.277	222.077	279.332	521.206	638.061									598.472
19.6947		447.644	274.592	294.423	260.625	296.78	282.033	274.23	274.34	307.74	288.233	228.692	242.322	265.185	308.296	347.498	276.567	236.841	239.136	249.956	261.534	293.276	275.908	233.533	228.467	371.933	335.622	409.411	501.167	306.405	253.833	254.6	262.183	221.972	213.589	220.798	222.969	300.119	600.306	634.789
19.9292		450.517	288.356	301.423	271.269	307.286	293.011	276.825	286.359	319.492	295.175	231.752	242.233	279.564	307.053	356.948	272.75	241.596	247.984	256.869	274.821	301.577	282.526	237.8	230.733	394.6	349.722	430.261	508.494	316.509	261.533	257.533	259.467	225.677	214.965	222.17	224.703	325.572	656.822
20.1636		452.856	301.563	302.642	283.909	316.778	303.659	281.402	304.623	335.078	302.093	230.566	241.945	289.659	314.048	366.188	270.633	243.44	254.451	264.019	286.411	314.162	286.425	241.133	232.733	421.267	366.178	456.294	513.078	327.506	268.617	258.967	259.117	227.185	217.221	223.375	227.585	360.336
20.3981			311.01	303.82	293.914	331.147	312.648	292.515	321.924	350.535	311.297	231.369	240.59	292.404	328.923	375.078	274.767	241.192	258.458	272.358	294.817	332.35	290.442	243.533	235.067	454.133	392.161	488.983		339.136	273.1	260.217	260.667	227.38	218.061	223.718	232.315	408.337
20.6325			321.793	305.985	301.878	344.974	322.801	306.805	341.43	365.357	321.898	234.803	236.523	290.984	343.74		286.867	239.838	262.721	279.871	304.219	350.224	296.253	245.467	237.4	489.933	428.75	523.989		348.792	274.917	261.817	262.933	228.792	217.564	224.932	238.399	476.667
20.867			333.22	312.16	309.751	350.182	332.765	319.37	363.825	381.178	334.824	235.277	235.697	289.195	350.755		303.533	245.218	267.605	282.434	315.448	365.808	303.32	249.467	241.8	526.267	469.75	562.294		354.184	274.133	265.65	264.167	231.024	215.772	226.73	245.701	577.36
21.1015			336.891	325.202	313.914	351.848	343.544	330.803	384.752	396.281	351.1	233.737	237.233	293.7	356.117		317.967	255.535	273.141	283.902	327.069	380.788	311.033	253.667	247.6	563.067	506.061	596.433		356.841	273.967	272.383	262.017	232.532	213.094	228.904	256.315	716.99
21.3359			331.827	333.805	316.62	354.169	359.125	341.711	401.809	407.538	371.222	232.854	236.842	307.201	368.455		327.583	264.718	281.635	290.523	337.001	391.696	321.964	258.267	253.267	590.267	535.811	610.567		356.945	277.783	279.667	257.6	233.177	212.245	231.63	273.712	873.433
21.5704			331.371	338.93	318.401	359.304	377.454	353.531	420.272	417.99	393.639	231.81	238.758	325.037	388.271		334.95	271.411	290.924	300.543	345.823	400.777	332.31	261.667	258.733	594.133	561.683			354.898	282.783	285.2	254.75	232.2	213.729	232.455	299.994	985.568
21.8048			336.596	340.531	318.587	367	392.775	367.252	445.158	435.299	419.036	230.861	244.179	344.903	414.908		344.2	279.056	297.709	312.756	356.383	411.57	339.022	261.933	259.533		582.122			351.29	284.383	287.983	253.717	229.439	217.163	231.1	341.093	986.063
22.0393			343.698	347.671	319.554	373.933	403.382	383.587	472.064	458.151	446.085	232.542	243.515	372.785	437.033		358.333	291.561	302.902	324.487	367.431	423.167	344.661	263.267	253.933		594.483			349.561	281.467	288.517	253.917	226.607	221	229.2	406.977
22.2738			357.401	360.148	325.785	379.972	414.375	400.482	494.492	485.181	467.555	236.088	237.13	410.137	453.017		376.2	309.23	309.625	337.618	376.923	432.889	351.329	268.067	251.333		601.922			354.336	276.533	288.667	257.033	225.553	223.186	227.859	504.893
22.5082			366.988	366.608	331.042	385.43	427.538	411.476	510.115	513.686	480.474	239.926	236.07	459.04	470.755		394.45	325.284	324.899	354.051	387.545	438.323	362.77	271.467	254.4					368.573	273.217	288.583	261.2	227.42	222.778	228.755	634.043
22.7427			378.099	375.743	332.282	389.755	440.37	419.597	520.557	533.487	491.592	244.377	241.609	512.784	484.937		412.683	337.159	352.052	371.171	403.624	445.248	379.66	271.133	258.8					390.017	272.85	286.717	262.733	231.23	221.348	231.265	784.257
22.9771			398.141	392.832	332.78	395.443	447.689	429.861	531.742		505.231	247.011	244.587	551.756	488.632		431.8	350.817	386.085	382.94	425.82	462.362	400.087	274.6	263.4					410.748	274.583	283.633	263.083	234.342	221.233	232.725	943.328
23.2116			422.933	410.865	334.361	408.373	450.306	440.159	545.962		515.589	246.477	241.133	566.894	486.397		449.883	369.044	422.179	384.576	447.707	482.466	423.79	284.267	267					427.241	274.783	280.517	266.65	235.189	221.968	232.711	1093.78
23.4461			443.923	419.076	343.204	432.652	456.307	458.039	560.613			246.054	238.111				464.3	387.763	457.14	384.662	461.207	491.439	451.952	296.133	269.6					443.671	270.9	277.683	274.983	234.374	223.285	231.845	1194
23.6805			461.27	426.585	357.894	470.357	456.375	480.193	563.284			251.083	238.739				472.417	406.624	490.565	390.569	465.598	487.152	483.129	309.2	275					461.886	265.867	276.017	284.417	234.756	225.197	231.158
23.915			468.763	443.997	368.683	511.326		497.873				258.933	241.415				474.267	427.458	517.735	399.428	462.131	483.151	515.519	324.667	283.933					479.025	263.467	274.983	291.05	237.668	228.13	231.495
24.1495			468.243	467.697	370.493	536.208		510.99				263.707	245.527					447.098	528.003	409.768	453.464	493.003	540.943	346.467	292.467					486.1	264.433	272.717	295.85	240.905	232.185	232.23
24.3839			473.186	502.19	367.308							265.433	250.433					466.879	525.707	419.785	448.059	515.579	553.708	370.8	302.267					481.995	266.8	270.867	301.833	242.098	236.221	235.139
24.6184			476.319	542.715	369.341							267.314	251.6					491.418	524.051	428.509	453.221	537.725	558.266	386.533	311.267						268.1	272.6	310.117	242.558	237.052	240.101
24.8528			482.58	574.333	383.488							271.061	247.124					513.743	525.156	437.837	462.003	548.255	560.66	403.733	317.4						268.217	275.633	318.083	242.667	236.289	242.822
25.0873			496.267	584.264	402.973							278.544	241.72					525.898	527.48	447.96	469.909			432.4	320.6						269.5	277.133	320.717	241.964	238.177	242.138
25.3218			497.913		423.458							286.448	244.6					528.356	536.756	459.177	481.598			463.8	325.933						276.65	279.433	317.383	242.262	240.76	241.227
25.5562					443.798							294.066	255.369					529.187	556.87	478.204	502.884			492.467	340.867						292.383	283.583	315.217	244.378	239.455	241.133
25.7907					456.823							307.323	266.945					535.63	583.298	511.478	529.456			516.467	365.867						315.567	287.067	319.5	245.988	237.663	242.975
26.0251					469.433							324.194	277.226					552.145	607.246	550.241	541.186			541.2	393.067						346.583	289.433	326.817	247.799	239.599	248.768
26.2596					488.913							337.469	289.14					567.687	615.005	582.586				581.867	424						386.367	293.3	333.067	251.785	243.086	260.01
26.4941					506.864							349.848	301.393							592.899				645.667	460.733						430.183	301.933	340.9	254.861	245.62	273.676
26.7285					512.963							364.592	313.505											716.2	502.067						469.7	314.917	357.45	254.261	249.277	285.695
26.963												378.19	331.823											772.333	538.2						498.517	330.517	390.6	252.382	254.389	296.646
27.1974												390.493	357.026											796.2	566.933						508.933	350.033	442.65	252.062	259.53	308.099
27.4319												406.053	384.285												594.867							372.083	504.1	253.291	265.436	320.102
27.6664												430.443	414.829												625.6							395.467	558.567	256.957	277.058	336.468
27.9008												459.518	443.405												653.267							421.117	593.817	264.073	298.467	364.72
28.1353												482.806	462.233												672.667							448.283	609.133	273.114	332.928	415.397
28.3697												492.375	472.596																			473.617	611.833	282.994	385.776	494.814
28.6042												495.936	476.679																			496.517		293.28	463.788	596.341
28.8387												500.738	477.019																			525.567		302.9	580.492	696.11
29.0731																																568.283		310.366	755.437	767.626
29.3076																																621.55		316.122	985.814	797.269
29.5421																																674.783		325.425	1217.82
29.7765																																710.85		341.664	1352.75
30.011																																		364.677
30.2454																																		395.817
30.4799																																		438.557
30.7144																																		494.061
30.9488																																		556.39
31.1833																																		618.247
31.4177																																		673.385
31.6522																																		713.208
31.8867																																		721.832
[truncated: 11 more columns]
