# Supplementary material for: Amoeboid-like migration ensures correct horizontal cell layer formation in the developing vertebrate retina
Source: eLife. 2022 May 31;11:e76408. doi: 10.7554/eLife.76408 (PMC9208757; doi:10.7554/eLife.76408)
Supplement: Figure 4—source data 3. [file elife-76408-fig4-data3.xlsx]

## Sheet: Figure 4H
Figure 4H
time (min)	trajectory of HC (micron)	distance HC center from centrosome (micron)
-20	-17.002	15.782
-15	-17.345	14.982
-10	-18.259	15.209
-5	-19.861	15.897
0	-22.033	14.295
5	-22.72	9.721
10	-20.432	5.603
15	-23.749	5.718
20	-26.265	6.176
25	-26.379	5.032
30	-26.15	6.633
35	-23.634	3.087
40	-25.007	4.46
45	-23.406	3.889
50	-24.892	3.659
55	-25.121	4.117
60	-25.121	6.061
65	-25.121	2.63
70	-25.464	3.888
75	-25.235	4.117
80	-24.206	3.202
85	-22.491	2.059
90	-21.462	-3.316
95	-23.863	-1.487
100	-24.892	0.686
105	-28.209	4.46
110	-28.438	3.66
115	-28.781	1.601
120	-30.267	2.173
125	-31.983	4.117
130	-31.983	2.859
135	-30.267	2.973
140	-31.525	4.46
145	-33.469	4.345
150	-33.813	2.516
155	-31.411	2.63
160	-33.241	2.402
165	-33.927	2.287
170	-34.041	2.401
175	-34.156	3.203
180	-32.211	2.058
185	-32.326	1.373
190	-32.555	2.859
195	-31.182	-0.229
200	-33.469	2.287
205	-33.241	2.745
210	-35.07	2.973
215	-34.499	2.288
220	-35.871	3.088
225	-35.757	2.288
230	-35.185	2.402
235	-35.871	3.088
240	-35.757	2.859
245	-34.499	2.288
250	-35.185	2.974
255	-36.1	1.83
260	-36.328	1.944
265	-35.185	3.431
270	-32.326	-0.915
275	-36.214	2.058
280	-37.243	1.372
285	-36.328	1.029
290	-37.015	0.458
295	-34.613	0.343
300	-35.414	1.601
305	-34.613	0.915
310	-32.44	2.173
315	-32.783	1.715
320	-33.584	1.029
325	-34.27	0.343
330	-35.299	1.258
335	-35.414	0.458
340	-35.185	2.173
345	-34.27	0.572
350	-35.642	1.143
355	-34.613	1.944
360	-34.613	1.601
365	-34.384	2.287
370	-34.842	2.745
375	-34.842	3.774
380	-34.499	2.288
385	-34.384	1.372
390	-34.384	0.686
395	-34.384	1.715
400	-36.443	0.343
405	-36.9	0.114
410	-37.129	-1.372
415	-36.557	-0.115
420	-38.044	0.115
425	-37.472	0.114
430	-37.243	0.915
435	-37.701	1.487
440	-38.501	-0.343
445	-38.387	-1.83
450	-37.929	-1.373
455	-38.616	-1.372
460	-37.129	-1.258
465	-36.557	-1.601
470	-35.871	0.229
475	-34.727	0.914
480	-34.156	2.745
485	-31.983	3.088
490	-30.953	2.058
495	-29.696	3.203
500	-29.81	1.487
505	-29.352	-0.572
510	-29.238	-1.029
515	-28.438	0.801
520	-27.637	0.457
525	-28.323	0.229
530	-29.467	-0.343
535	-28.438	-0.686
540	-29.009	-1.373
545	-29.009	-2.059
550	-29.352	-1.487
555	-29.581	-1.601
560	-29.81	-0.686
565	-29.81	1.258
570	-31.297	1.258
575	-30.839	0.229
580	-30.839	1.944
585	-30.153	1.487
590	-30.61	1.143
595	-30.61	0.457
600	-31.068	1.487
605	-31.068	1.029
610	-31.411	1.487
615	-31.297	0.344
620	-32.097	0.114
625	-31.983	-0.228
630	-31.983	0.686
635	-31.983	0.915
640	-31.411	0.229
645	-30.382	-2.173
650	-30.382	0.229
655	-30.382	1.487
660	-30.496	-1.029
665	-30.153	-0.686
670	-29.009	1.715
675	-28.895	2.173
680	-27.866	-1.372
685	-25.35	-1.487
690	-26.15	-0.229
695	-25.007	-3.774
700	-25.235	-2.288
705	-24.092	-3.659
710	-25.579	1.258
715	-26.265	1.258
720	-26.837	1.258
725	-26.722	0.686
730	-28.438	0.572
735	-27.98	-0.572
740	-29.696	1.144
745	-29.581	2.401
750	-28.895	3.545
755	-28.781	3.774
760	-28.094	4.688
765	-28.666	4.803
770	-27.523	2.631
775	-28.438	3.317
780	-27.408	0.571
785	-25.922	2.859
790	-25.807	3.888
795	-24.435	4.574
800	-25.007	8.005
805	-25.807	8.348
810	-25.693	6.976
815	-24.321	3.774
820	-23.749	3.317
825	-22.948	1.601
830	-22.376	0.114
835	-21.919	2.287
840	-23.406	2.974
845	-24.435	-1.258
850	-27.523	-2.516
855	-26.608	-4.345
860	-26.036	-2.63
865	-24.092	0.229
870	-18.717	0.114
875	-15.858	0.801
880	-14.371	-0.115
885	-13.228	1.487
890	-14.714	3.316
895	-13.685	2.516
900	-12.999	1.487
905	-12.656	2.059
		-44.601

## Sheet: Figure 4_Sup Fig 2B-D
Figure 4_Sup Fig 6B-D
Sup Fig 6B					Sup Fig 6C				Sup Fig 6D
time (min)	trajectory of HC (HC centroid) (micron)	distance HC center from centrosome (micron)			time (min)	trajectory of HC (HC centroid) (micron)	distance HC center from centrosome (micron)		time (min)	trajectory of HC (HC centroid) (micron)	distance HC center from centrosome (micron)
-25	-14.638	13.799			-45	-17.383	16.316		-15	-32.043	13.807
-20	-10.979	9.569			-40	-19.136	17.764		-10	-32.304	11.029
-15	-9.911	3.011			-35	-19.822	17.611		-5	-32.998	9.639
-10	-7.472	5.833			-30	-20.737	19.365		0	-33.867	9.987
-5	-9.149	7.395			-25	-19.746	17.916		5	-36.559	10.595
0	-10.674	1.373			-20	-16.925	14.79		10	-39.077	7.729
5	-12.046	2.059			-15	-20.127	18.069		15	-38.382	6.513
10	-12.961	3.888			-10	-20.661	18.145		20	-39.337	4.255
15	-13.418	2.744			-5	-20.204	17.841		25	-39.772	3.561
20	-16.01	3.964			0	-21.119	19.823		30	-41.508	4.428
25	-15.248	0.457			5	-25.083	22.72		35	-39.077	2.518
30	-17.078	0.801			10	-26.379	24.702		40	-39.685	2.953
35	-18.45	1.601			15	-27.828	25.922		45	-39.511	2.952
40	-17.23	-0.077			20	-25.998	23.787		50	-37.601	-1.389
45	-16.468	-2.783			25	-26.913	25.769		55	-37.601	0.435
50	-16.925	-3.584			30	-25.54	24.396		60	-38.122	1.129
55	-16.62	-4.003			35	-23.33	20.433		65	-38.99	1.824
60	-20.28	-3.888			40	-18.831	14.943		70	-38.122	1.911
65	-21.5	-2.211			45	-20.89	16.011		75	-38.729	3.82
70	-23.482	1.258			50	-21.728	15.095		80	-39.945	3.907
75	-26.532	2.135			55	-23.101	12.427		85	-40.553	2.779
80	-32.021	1.792			60	-22.491	7.777		90	-41.161	3.474
85	-32.478	-0.496			65	-24.321	6.71		95	-41.508	3.3
90	-30.801	-0.229			70	-24.931	6.71		100	-41.248	2.953
95	-30.954	-0.419			75	-25.083	4.803		105	-40.727	2.432
100	-33.851	1.906			80	-25.845	4.04		110	-42.116	2.344
105	-35.375	2.058			85	-25.083	3.736		115	-40.553	1.042
110	-35.833	1.144			90	-25.54	2.439		120	-41.942	2.778
115	-34.766	-0.953			95	-25.845	3.507		125	-41.508	3.907
120	-34.308	0.991			100	-26.684	2.592		130	-41.248	1.129
125	-33.698	1.41			105	-27.523	2.669		135	-42.55	2.257
130	-34.766	0.42			110	-28.056	1.982		140	-42.377	3.04
135	-33.546	-0.915			115	-29.657	2.592		145	-41.595	1.476
140	-35.375	-0.687			120	-28.819	3.05		150	-42.029	2.692
145	-34.003	-0.686			125	-30.115	4.193		155	-43.332	2.345
150	-33.088	-0.801			130	-30.725	3.126		160	-43.94	1.737
155	-34.461	0.458			135	-31.64	1.601		165	-45.763	5.297
160	-34.461	2.173			140	-33.698	4.346		170	-45.763	4.168
165	-34.156	-0.076			145	-34.232	6.709		175	-45.416	3.126
170	-33.393	0.19			150	-33.469	3.812		180	-44.808	2.692
175	-32.936	-1.982			155	-34.461	3.965		185	-44.113	-1.563
180	-32.936	-2.096			160	-35.071	4.88		190	-45.676	-0.087
185	-33.698	0.495			165	-34.994	4.727		195	-45.763	0.608
190	-35.528	1.296			170	-34.003	5.108		200	-45.242	-1.477
195	-35.528	1.868			175	-29.124	8.539		205	-44.461	-1.129
200	-35.375	1.486			180	-25.388	5.947		210	-44.113	-4.082
205	-34.766	-0.495			185	-21.957	2.592		215	-45.242	-2.692
210	-34.766	-1.41			190	-23.634	1.296		220	-44.2	-4.082
215	-34.766	-2.211			195	-24.473	-0.229		225	-44.982	0.869
220	-34.766	-0.495			200	-24.168	-0.839		230	-44.113	0
225	-35.68	3.164			205	-25.464	-2.516		235	-44.721	-0.174
230	-35.375	2.058			210	-26.913	-1.677		240	-45.937	2.431
235	-36.138	2.821			215	-28.895	-5.413		245	-45.59	1.042
240	-35.833	0.229			220	-27.904	-5.108		250	-45.242	1.389
245	-32.326	-0.991			225	-29.276	-4.498		255	-45.329	0.695
250	-31.868	-1.678			230	-29.352	-4.194		260	-45.937	1.216
255	-33.088	-1.944			235	-29.81	-2.821		265	-44.721	0.868
260	-35.223	-0.038			240	-31.258	-2.669		270	-46.198	2.171
265	-35.375	-0.915			245	-31.411	-1.982		275	-44.461	0.434
270	-34.461	-0.343			250	-30.496	-3.278		280	-45.85	2.431
275	-35.375	-2.059			255	-29.962	-2.593		285	-45.85	2.171
280	-34.918	-3.317			260	-29.352	-3.279		290	-46.024	1.911
285	-36.29	-1.258			265	-30.267	-0.305		295	-46.024	1.476
290	-35.528	-2.02			270	-28.209	0.839		300	-46.632	2.345
295	-34.766	-0.495			275	-26.074	-1.296		305	-48.021	2.431
300	-33.698	0.267			280	-26.455	2.592		310	-48.021	1.91
305	-33.241	-0.991			285	-27.294	1.067		315	-46.892	0.955
310	-32.478	2.477			290	-26.15	2.287		320	-47.413	0.868
315	-30.496	2.096			295	-25.236	0.763		325	-47.153	-0.26
320	-30.039	1.639			300	-23.558	1.677		330	-46.892	-0.608
325	-30.039	0.61			305	-23.634	-3.431		335	-47.674	0.261
330	-30.954	2.211			310	-22.186	-3.354		340	-47.24	0.956
335	-31.868	1.982			315	-21.805	-1.372		345	-45.242	-2.258
340	-30.191	-0.839			320	-21.042	-1.906		350	-44.287	-2.779
345	-29.886	1.83			325	-20.432	1.524		355	-45.416	-0.955
350	-30.344	1.144			330	-19.517	2.744		360	-45.242	-0.174
355	-31.106	2.02			335	-20.204	2.364		365	-45.59	2.519
360	-30.954	2.44			340	-19.517	1.906		370	-45.503	1.911
365	-32.021	3.05			345	-18.984	-1.067		375	-46.371	1.216
370	-31.411	1.296			350	-18.831	-2.211		380	-45.155	-0.087
375	-32.478	2.363			355	-18.831	-2.821		385	-44.374	-0.868
380	-32.021	1.449			360	-19.213	-2.058		390	-41.595	-3.474
385	-33.241	1.982			365	-20.28	-0.915		395	-43.158	-2.866
390	-32.631	-1.143			370	-21.5	-1.753		400	-41.682	-3.387
395	-32.631	1.144			375	-22.338	-2.44		405	-41.595	-3.995
400	-32.021	2.707			380	-22.491	-1.601		410	-37.514	-6.252
405	-31.411	1.868			385	-23.33	-2.134		415	-35.343	-7.902
410	-31.106	1.105			390	-22.415	-3.812		420	-35.43	-6.512
415	-31.259	0.458			395	-21.652	0		425	-35.169	-5.297
420	-31.868	1.524			400	-22.338	1.296		430	-33.606	-3.908
425	-30.496	2.554			405	-21.728	2.287		435	-32.217	-5.557
430	-27.904	2.592			410	-20.585	3.202		440	-30.567	-6.339
435	-25.769	2.859			415	-19.289	5.566		445	-29.872	-6.6
440	-22.567	1.029			420	-18.374	7.472		450	-30.046	-5.21
445	-22.415	4.537			425	-15.858	5.718		455	-26.92	-4.602
450	-20.89	2.44			430	-15.019	2.211		460	-27.18	-3.56
455	-20.127	4.307			435	-15.401	2.059		465	-27.006	-1.477
460	-18.145	4.384			440	-16.01	2.515		470	-26.659	-0.782
465	-16.925	2.706			445	-16.849	3.812		475	-26.746	1.997
470	-16.315	2.439			450	-18.831	-4.88		480	-25.183	0.347
475	-15.096	1.792			455	-19.213	2.898		485	-25.27	-2.692
480	-15.553	0.762			460	-17.23	3.202
485	-16.163	-2.287			465	-15.705	4.726
490	-16.163	-3.316			470	-13.799	4.955
495	-16.925	0.876			475	-11.817	4.498
500	-17.993	3.889
505	-19.213	-0.266
510	-18.145	1.41
515	-17.078	0.801
520	-16.925	0.076
525	-17.383	-0.838
530	-17.535	-1.487
535	-18.603	0.61
540	-18.908	0.572
545	-17.84	1.906
550	-17.23	1.868
555	-18.908	-0.114
560	-19.365	-1.144
565	-19.822	-1.602
570	-20.432	-0.877
575	-21.195	-0.8
580	-21.195	-0.229
585	-20.432	-0.877
590	-19.518	-1.448
595	-19.518	-1.791
600	-20.432	-1.792
605	-20.432	-1.335
610	-21.5	-0.61
615	-21.5	-1.525
620	-22.567	-1.029
625	-22.415	-1.524
630	-21.347	-0.877
635	-22.11	-1.143
640	-21.652	-0.801
645	-22.262	-0.419
650	-22.72	-0.19
655	-22.72	1.411
660	-21.5	0.763
665	-21.195	1.258
670	-21.195	0.915
675	-21.195	1.83
680	-21.195	1.258
685	-20.432	0.838
690	-20.432	-0.877
695	-20.432	-1.106
700	-21.195	-0.229
705	-19.975	-0.191
710	-19.06	-0.877
715	-19.06	1.182
720	-19.06	1.067
725	-19.822	1.486
