# Supplementary material for: Amoeboid-like migration ensures correct horizontal cell layer formation in the developing vertebrate retina
Source: eLife. 2022 May 31;11:e76408. doi: 10.7554/eLife.76408 (PMC9208757; doi:10.7554/eLife.76408)
Supplement: Figure 5—source data 1. [file elife-76408-fig5-data1.xlsx]

## Sheet: Figure 5C
Figure 5C
Final Position relative to OPL (%)
CTL-hs	LMNA OE-hs
-7.69231	-11.6492
-4.19968	-41.2943
-4.10526	-96.025
-4.98038	-30.0623
-5.50825	-12.941
-4.74693	-113.263
-4.99677	-100
-6.92012	-11.2681
-7.03571	-102.038
-10.074	-57.73
-6.41558	-98.2661
-9.01768	-77.7188
-8.8746	-103
-5.848	-90.731
-7.68462	-64.9878
-8.66829	-141.318
-7.05705	-131.643
-6.53264	-135.868
-14.572	-102.12
-11.8886	-87.52
-8.49688	-166.939
-6.73567	-165.457
-7.23022	-114.724
-4.21634	-122.77
-8.85463	-131.938
-7.83145	-94.1981
-10.4299	-134.953
	-7.58342
	-7.95543
	-10.1078
	-10.1078
	-10.2763
	-10.1078
	-105.054
	-10.1078
	-100.5
	-100
	-148.84
	-11.5308
	-11.1295
	-50.5689
	-9.54175
	-7.50469
	-7.72502
	-13.9545
	-8.53018
	-6.9851
	-82.8878
	-78.2613
	-97.5456
	-110.43
	-78.5279
	-74.234
	-84.3551
	-99.3877
	-127.914
	-136.811
	-136.065
	-160.277
	-129.832
	-103.682
	-86.1972
	-79.9095
	-106.136
	-115.645
	-136.196
	-111.657
	-84.97
	-98.1605
	-165.076
	-159.218
	-165.608
	-170.401
	-145.373
	-131.528
	-132.061
	-111.293
	-118.235
	-132.781
	-138.025
	-107.424
	-92.6553
	-110.766
	-89.644
	-91.5362
	-98.438
	-104.196
	-95.9982
	-91.9148
	-88.3392
	-88.9294
	-113.424
	-116.085
	-98.5186
	-123.165
	-107.567
	-115.973
	-134.123
	-96.968
	-123.651
	-122.751
	-151.367
	-142.331
	-134.8
	-105.43
	-153.627
	-146.849
	-140.071
	-115.973
	-113.714
	-100.836
	-149.323
	-150.614
	-132.152
	-98.425
	-116.233
	-113.836
	-108.991
	-108.385
	-124.502
	-109.759
	-91.1263
	-111.293
	-2.6625
	-4.76284
	-4.76284
	-10.7032
	-3.7275
	-22.4221
	-8.52003
	-10.1315
	-14.7283
	-5.43048
	-5.05176
	-7.4169
	-3.36784
	-13.9775
	-4.76284
	-14.1489
	-7.14427
	-12.6574
	-4.76284
	-4.90943
	-6.02457
	-15.8324
	-11.9665
	-5.48244
	-12.5675
	-6.50002
	-7.4169
	-11.6787
	-8.4196
	-5.95355
	-6.39003
	-6.23277
	-6.81935
	-13.9369
	-5.32503
	-3.57213
	-13.6075
	-6.81935
	-4.15898
	-6.07145
	-3.40968
	-8.6685
	-9.42092
	-4.29316
	-4.76284
	-7.67985
	-18.0187
	-4.29316
	-118.448
	-133.864
	-124.46
	-124.46
	-149.712
	-150.915
	-144.992
	-136.047
	-137.412
	-173.16
	-163.54
	-162.139
	-173.404
	-122.443
	-133.478
	-102.036
	-97.7841
	-113.089
	-84.7784
	-119.65
	-125.663
	-87.1833
	-132.878
	-111.233
	-98.9417
	-113.94
	-117.341
	-114.79
	-114.79
	-108.285
	-121.14
	-131.993
	-114.272
	-105.779
	-79.1278
	-5.95207
	-6.80238
	-6.80238
	-5.95207
	-4.57898
	-6.8553
	-7.215
	-7.215
	-6.0125
	-5.70395
	-4.81001
	-5.44455
	-7.83936
	-9.50661
	-7.31451
	-7.26493
	-9.15796
	-8.06661
	-6.8553
	-6.19024
	-5.10176
	-8.54538
	-8.50297
	-7.83936
	-7.26493
	-7.60528
	-6.0125
	-7.31451
	-6.0125
	-18.0776
	-19.8321
	-7.83936
	-3.80263
	-20.7061
	-8.87735
	-7.69975
	-23.0209
	-19.5753
	-7.65266
	-14.48
	-8.54538
	-10.5176
	-8.37444
	-9.95245
	-16.3336
	-19.3897
	-7.26493
	-6.13157
	-6.0125
	-4.95803
	-6.13157
	-6.13157
	-6.0125
	-6.13157
	-122.109
	-165.137
	-146.53
	-170.952
	-134.901
	-108.736
	-128.884
	-146.221
	-114.303
	-104.085
	-94.7814
	-131.572
	-143.084
	-148.84
	-137.328
	-148.84
	-171.043
	-111.014
	-125.815
	-88.8108

## Sheet: Figure 5E
Figure 5E	cell-1	cell-2	cell-3	cell-4
time (min)	distance from apical (micron)	distance from apical (micron)	distance from apical (micron)	distance from apical (micron)
0	-33.762	-78.075	-83.742	-70.221
5	-34.231	-78.075	-81.241	-69.908
10	-36.81	-77.841	-81.397	-70.221
15	-36.81	-76.2	-81.397	-70.221
20	-39.624	-79.013	-81.397	-71.471
25	-38.217	-79.013	-81.553	-71.159
30	-37.983	-79.013	-82.022	-70.534
35	-37.983	-79.013	-83.585	-70.534
40	-37.514	-78.31	-82.491	-70.377
45	-37.514	-78.31	-82.647	-69.752
50	-37.514	-79.482	-83.273	-70.065
55	-36.576	-79.717	-83.585	-70.377
60	-37.514	-79.717	-84.21	-69.283
65	-37.514	-79.951	-84.367	-68.814
70	-37.279	-79.951	-84.367	-67.251
75	-37.045	-79.951	-85.461	-66.939
80	-39.155	-79.717	-85.305	-65.844
85	-39.858	-79.717	-85.461	-67.251
90	-39.624	-79.951	-86.086	-68.345
95	-37.279	-79.951	-84.679	-68.658
100	-35.872	-79.951	-85.148	-70.534
105	-37.045	-79.951	-84.836	-70.846
110	-37.045	-79.951	-83.898	-71.471
115	-36.81	-78.779	-83.898	-70.846
120	-38.452	-79.482	-83.898
125	-37.983	-76.669	-82.647
130	-39.389	-75.027	-82.491
135	-39.389	-76.2	-82.96
140	-37.279	-77.138	-83.429
145	-37.514	-79.248	-83.742
150	-37.279	-77.606	-84.054
155	-35.169	-78.075	-84.367
160	-35.169	-76.903	-84.523
165	-36.107	-77.372	-84.523
170	-36.81	-79.482	-85.617
175	-37.279	-78.075	-84.679
180	-35.872	-77.841	-83.742
185	-36.81	-76.669	-83.116
190	-37.279	-77.372	-83.585
195	-36.576	-78.075	-83.273
200	-38.217	-78.31	-83.273
205	-38.452	-78.544	-82.335
210	-38.686	-78.544	-82.804
215	-38.686	-78.779	-83.116
220	-37.279	-78.779	-82.647
225	-37.983	-77.138	-81.866
230	-37.983	-77.841	-81.553
235	-36.107	-77.841	-82.491
240	-34.935	-78.31	-84.21
245	-34.935	-78.31	-84.21
250	-34.935	-79.717	-85.617
255	-33.528	-78.779	-85.93
260	-33.528	-79.951	-86.868
265	-33.528	-79.951	-86.868
270	-35.404	-80.654	-87.493
275	-34.7	-81.827	-89.212
280	-34.7	-80.186	-88.274
285	-33.762	-80.654	-88.431
290	-34.466	-80.654	-88.431
295	-34.231	-79.717	-87.649
300	-34.7	-80.42	-86.555
305	-33.293	-80.42	-86.555
310	-33.293	-80.42	-86.711
315	-33.293	-79.717	-86.711
320	-32.824	-79.717	-86.711
325	-32.356	-79.717	-86.399
330	-32.356	-80.42	-85.774
335	-31.887	-79.482	-85.774
340	-31.887	-79.951	-85.774
345	-30.949	-80.186	-85.774
350	-31.652	-80.42	-85.774
355	-31.652	-79.013	-85.774
360	-31.652	-79.013	-85.774
365	-31.652	-79.248	-86.086
370	-31.652	-80.186	-86.868
375	-31.652	-80.186	-86.868
380	-30.949	-80.654	-86.868
385	-30.949	-79.717	-86.868
390	-30.949	-79.482	-86.868
395	-32.59	-79.482	-86.868
400	-32.59	-79.951	-86.868
405	-32.59	-79.248	-86.868
410	-32.59	-80.654	-86.868
415	-31.652	-80.654	-86.868
420	-31.652	-80.654	-86.868
425	-32.121	-80.654	-86.868
430	-31.418	-79.951	-86.868
435	-31.652	-80.42	-86.868
440	-31.887	-79.248	-86.868
445	-32.824	-79.013	-86.868
450	-31.418	-78.075	-86.868
455	-31.418	-78.075	-85.148
460	-31.652	-78.544	-85.148
465	-31.418	-77.372	-85.148
470	-31.183	-77.606	-84.992
475	-30.714	-77.606	-84.992
480	-30.714	-77.841	-84.992
485	-31.887	-76.903	-84.992
490	-31.887	-76.903	-84.992
495	-31.887	-77.606	-84.992
500	-31.418	-77.138	-84.992
505	-29.542	-77.138	-84.992
510	-29.542	-78.075	-84.992
515	-29.542	-77.372	-84.992
520	-29.542	-77.372	-84.992
525	-28.604	-77.372	-84.523
530	-28.37	-77.372	-84.836
535	-28.135	-77.372	-84.836
540	-28.839	-78.544	-84.836
545	-28.839	-78.544	-84.836
550	-28.839	-78.544	-84.992
555	-27.666	-78.544	-86.242
560	-28.839	-78.544	-89.681
565	-28.37	-78.544	-89.681
570	-26.963	-78.544	-89.681
575	-28.604	-78.544	-89.681
580	-28.604	-77.606	-89.681
585	-29.073	-78.544	-89.681
590	-27.666	-78.544	-89.525
595	-26.963	-79.248	-89.525
600	-25.791	-79.248	-89.525
605	-23.915	-79.013	-89.994
610	-22.977	-79.013	-90.306
615	-19.226	-79.248	-90.306
620	-18.522	-79.248	-90.306
625	-18.522	-79.717	-90.306
630	-18.757	-80.42	-90.306
635	-17.585	-80.42	-90.306
640	-16.881	-80.42	-90.306
645	-17.819	-80.42	-90.306
650	-19.929	-80.42	-90.306
655	-19.695	-82.061	-89.681
660	-20.633	-81.827	-89.838
665	-23.68	-82.296	-89.838
670	-23.212	-81.827	-89.838
675	-22.039	-82.061	-89.838
680	-22.508	-82.061	-89.838
685	-22.039	-80.654	-89.838
690	-22.039	-82.296	-90.463
695	-22.039	-82.061	-90.463
700	-22.039	-82.061	-90.463
705	-22.039	-82.765	-90.463
710	-22.039	-82.53	-90.463
715	-18.991	-82.999	-90.619
720	-17.819	-83.234	-90.619
725	-16.881	-83.702	-90.619
730	-16.881	-83.702	-91.244
735	-15.474	-83.702	-93.589
740	-16.178	-83.702	-92.807
745	-18.522	-83.702	-92.807
750	-18.053	-84.64	-92.807
755	-17.116	-84.64	-92.807
760	-16.647	-84.64	-92.807
765	-16.178	-84.406	-92.807
770	-16.178	-84.406	-92.807
775	-15.943	-84.406	-92.807
780	-16.647	-84.406	-92.807
785	-16.647	-84.406	-92.807
790	-16.647	-84.406	-92.807
795	-16.881	-85.109	-94.683
800	-17.116	-84.171	-94.683
805	-17.116	-84.406	-94.683
810	-16.881	-84.406	-94.527
815	-16.881	-84.406	-94.058
820	-18.288	-84.875	-94.683
825	-18.288	-84.406	-94.527
830	-18.288	-84.875	-94.839
835	-16.881	-85.578	-94.839
840	-17.35	-85.578	-94.839
845	-16.412	-85.578	-94.839
850	-18.053	-85.578	-95.621
855	-17.116	-85.578	-96.559
860	-16.178	-85.578	-96.559
865	-15.943	-85.578	-96.402
870	-16.412	-85.578	-96.559
875	-15.474	-86.047	-96.559
880	-15.24	-86.047	-97.028
885	-14.537	-87.454	-97.653
890	-14.537	-87.454	-97.965
895	-12.661	-87.454	-97.965
900	-13.833	-87.219	-97.965
905	-13.833	-87.688	-97.965
910	-13.364	-87.688	-97.965
915	-13.599	-87.688	-97.965
920	-13.13	-88.392	-97.965
925	-13.13	-88.392	-97.809
930	-12.661	-87.688	-97.497
935	-12.661	-87.454	-96.871
940	-12.192	-86.516	-95.152
945	-11.489	-86.75	-95.152
950	-11.489	-86.75	-95.308
955	-11.489	-87.454	-95.465
960	-11.489	-87.454	-95.621
965	-11.489	-87.688	-96.246
970	-12.426	-88.861	-96.402
975	-13.13	-88.861	-96.402
980	-11.957	-88.861	-96.715
985	-12.661	-88.861	-96.715
990	-12.661	-88.861	-96.715
995	-12.192	-89.095	-96.715
1000	-12.895	-89.33	-96.715
1005		-89.33	-96.715
1010		-89.564	-96.715
1015		-89.095	-96.715
1020		-88.861	-96.715
1025		-89.33	-96.559
1030		-90.033	-96.559
1035		-90.267	-97.184
1040		-90.736	-97.653
1045		-90.971	-97.653
1050		-90.971	-97.653
1055		-90.736	-97.653
1060		-90.736	-97.653
1065		-91.44	-97.653
1070		-92.612	-97.653
1075		-92.377	-97.653
1080		-91.44	-97.653
1085		-91.909	-97.653
1090		-93.081	-97.653
1095		-93.081	-97.653
1100		-94.253	-97.653
1105		-94.019	-97.653
1110		-93.784	-99.685
1115		-94.957	-99.685
1120		-94.957	-99.685
1125		-94.957	-99.685
1130		-94.957	-99.685
1135		-94.957	-99.685
1140		-94.957	-99.685
1145		-94.957	-100.466
1150		-94.488	-100.466
1155		-95.66	-100.466
1160		-95.66	-100.466
1165		-95.894	-100.466
1170		-96.363	-100.466
1175		-96.363	-100.466
1180		-97.536	-100.466
1185		-97.536	-101.092
1190		-97.536	-101.092
1195		-97.77	-101.092
1200		-97.77	-101.092
1205		-97.067	-101.092
1210		-97.77	-101.092
1215		-97.77	-101.092
1220		-98.473	-101.092
1225		-98.942	-101.092
1230		-99.646	-101.092
1235		-99.646	-101.092
1240		-99.88	-101.092
1245		-99.646	-101.092
1250		-99.411	-101.092
1255		-100.584	-101.092
