# Supplementary material for: Amoeboid-like migration ensures correct horizontal cell layer formation in the developing vertebrate retina
Source: eLife. 2022 May 31;11:e76408. doi: 10.7554/eLife.76408 (PMC9208757; doi:10.7554/eLife.76408)
Supplement: Figure 6—source data 1. [file elife-76408-fig6-data1.xlsx]

## Sheet: Figure 6C
Figure 6C
HC position in control vs atoh7 Morphant retina
control (50-55 hpf)	atoh7 MO (50-55 hpf)	control (82 hpf)	atoh7 MO (82 hpf)
distance from OPL (%)	distance from OPL (%)	distance from OPL (%)	distance from OPL (%)
-45.5462	-81.9434	-3.81788	-142.644
-48.8462	-76.0667	-3	-156.958
-56.041	-76.3844	-2	-5.34378
-48.4967	-82.4818	-2.98	-6.67999
-57.8575	-85.5778	-3.1245	-9.22619
-90.5069	-85.6891	-2.8732	-6.61376
-65.8918	-89.6965	-2.98999	-142.157
-48.2749	-47.6605	-3.11787	-137.745
-54.4899	-71.3409	-2.09865	-162.134
-57.6699	-53.376	-2.8976	-147.041
-52.8599	-64.2665	-2.34521	-5.21854
-62.2372	-72.4415	-2.7	-5.21854
-58.7476	-88.5587	-3.34568	-8.04117
-44.6888	-81.3693	-2.1952	-8.04117
-43.2985	-62.7669	-3.09856	-7.9566
-70.524	-77.2829	-2.17653	-10.7052
-69.465	-91.6919	-3.2564	-8.74139
-57.0857	-72.2978	-4.09876	-7.8346
-36.4462	-81.7327	-2.65695	-6.63539
-50.2886	-88.003	-2.7896	-7.37265
-60.5506	-86.8057	-3.3123	-126.968
-65.6655	-79.3324	-3.67832	-147.164
-51.725	-73.1121	-4.67272	-156.931
-49.0707	-88.3081	-2.9898	-159.198
-52.81	-81.4756	-5	-136.009
-43.2622	-54.9427	-3.09101	-166.987
-54.865	-88.5945	-2.908	-143.081
-58.5612	-90.5792	-3.7655	-170.84
-55.6375	-87.4295	-3.1232	-5.13406
-45.4126	-67.343	-3.0987	-7.77363
-50.3731	-45.9379	-2.35634	-128.512
-59.9633	-88.7272	-2.55657	-143.88
-56.6628	-104.041	-4	-153.653
-59.1291	-80.6029	-4.89839	-137.601
-49.9654	-74.2418	-3.9202	-121.525
-69.2715	-55.7793	-3.53636	-115.246
-53.3746	-76.2171	-2.89792	-126.411
-63.7595	-86.0978	-2.1233	-136.892
-71.3399	-69.1609	-2.7868	-4.99675
-66.509	-81.3938	-4.7673	-8.06788
-64.921	-86.4377	-2.8963	-7.7404
-67.4637	-85.029	-5.46794	-9.11162
-64.1782	-70.686	-5.90793	-5.56459
-63.6275	-48.8538	-3.67	-4.79892
-49.2427	-64.9947	-2.96321	-5.13687
-73.7383	-62.3789	-2.7863	-5.35762
-62.9354	-61.3981	-4	-4.20573
-56.4722	-44.2551	-3.19292	-7.62712
-70.5606	-69.0446	-3.0989	-3.61823
-62.3794	-68.9292	-4.0942	-3.96601
-72.692	-74.6165	-5.4647
-61.0362	-44.9128	-5.46794	-4.80337
-52.7621	-58.7271	-5.90793	-3.27126
-66.0713	-51.4845	-3.10233	-4.27781
-60.5506	-60.2508	-3.0898	-6.97738
-72.3008	-67.4511	-3.67	-4.17007
-52.7995	-72.5213	-5.90793	-4.8183
-58.3333	-77.1079	-4.9989	-5.38358
-70.2009	-28.5967	-4.876	-141.136
-51.5249	-58.1133	-3.8982	-142.203
-31.5043	-62.4118	-3.782	-7.45821
-31.5043	-78.0317	-4.67892	-162.424
-35.654	-68.3642	-5.556	-155.312
-69.6935	-61.2306	-2.7878	-183.98
-56.0848	-57.3249	-3.04	-195.488
-57.8072	-68.7483	-5	-5.5464
-53.876	-81.3693	-5	-8.86875
-49.4426	-89.5513	-3.02614	-130.991
-45.764	-71.033	-3.75347	-116.752
-36.6923	-80.6894	-3.02614	-132.414
-34.6098	-77.4937	-3.75347	-150.212
-52.2105	-98.3206	-2.72462	-130.279
-54.9116	-101.075	-2.7043	-134.746
-42.3568	-93.4452	-3.75347	-154.038
-56.6986	-94.3469	-3.81788	-119.305
-59.5367	-98.3111		-160.583
-43.8104	-105.365		-133.4
-43.3382	-80.2197		-136.693
-47.4389	-91.0016		-126.09
-52.6031	-101.623		-164.479
-58.4443	-59.7413		-182.316
-53.2251	-73.164		-184.383
-66.6218	-77.2829		-118.888
-58.1277	-89.7617		-140.245
-50.6253	-85.4963		-130.991
-42.3553	-101.272		-90.6107
-54.1259	-100.92		-79.5361
-57.7318	-100.599		-100.679
-60.5315	-107.512		-116.787
-61.5811	-107.408		-84.0561
-57.5796	-89.3509		-139.533
-45.524	-87.1493		-118.176
-57.1037	-78.9012		-137.398
-47.0856	-89.6854		-145.941
-32.2832	-79.7059		-111.057
-50.7864	-48.7415		-158.043
-61.7587	-42.4735		-142.381
-57.8198	-84.7775		-135.262
-56.2668	-51.8063		-148.502
-47.1395	-70.5723		-109.237
-46.393	-54.5846		-111.251
-58.1048	-78.7701		-123.332
-62.4678	-51.2919		-138.434
-49.7464	-72.662		-165.617
-62.6651	-57.3863		-118.185
-46.8718	-68.8672		-101.243
-58.5447	-71.8152		-164.672
-62.9897	-59.5965		-160.935
-63.6491	-71.1896		-153.06
-51.582	-81.7616		-173.579
-52.2534	-82.0293		-156.363
-71.1848	-80.5297		-144.977
-69.8886	-65.2789		-120.667
-58.856	-91.6649		-93.303
-67.7467	-75.9729		-4.30297
-62.1094	-67.9707		-5.03271
-66.4881	-84.3072		-5.99161
-59.5469	-75.5384		-5.50151
-67.9313	-91.0957		-6.70916
-59.1114	-82.342		-16.5143
-72.2663	-63.0496		-4.66491
-62.4417	-69.5912		-7.49014
-55.2456	-101.168		-149.268
-71.5646	-79.1973		-149.268
-71.2536	-61.8291		-121.849
-44.672	-70.4536		-129.607
-40.8218	-83.698		-179.277
-48.4349	-60.5601		-166.084
-63.5168	-92.3544		-145.285
-97.5193	-94.4087		-130.201
-66.9534	-60.3655		-130.201
-52.8367	-100.911		-128.415
-50.9828	-87.1859		-136.097
-56.3113	-63.9855		-132.805
-42.6589	-56.5013		-118.785
-56.8059	-43.5608		-130.062
-42.0966	-65.2125		-114.696
-67.0017	-82.2436		-128.964
-58.4068	-70.7994		-100.428
-46.4163	-73.0733		-150.915
-46.8495	-87.8278		-196.858
-34.8185	-79.6899		-174.512
-38.2672	-64.5813		-95.4877
-55.9999	-80.9175		-140.941
-39.1108	-97.0555		-143.577
-46.3157	-95.4483		-177.406
-37.4287	-85.2083		-126.219
-26.4661	-82.3939		-133.761
-37.2796	-108.414		-151.722
-37.0111	-85.3372		-4.68461
-34.4445	-85.8876		-3.95042
-27.5875	-84.3493		-5.45423
-36.7477	-75.3803		-6.4384
-45.7077	-92.3862		-4.93803
-65.5161	-85.8366		-4.93803
-53.6347	-89.7013		-5.92562
-56.2583	-89.2664		-2.5179
-52.623	-87.8859		-4.68461
-39.6142	-88.5052		-6.87787
-29.9252	-75.3029		-3.12308
-38.1451	-72.5366		-3.02614
-49.1908	-60.4308		-3.06175
-41.436	-55.3128		-3.75347
-48.0533	-73.3743		-3.96412
-32.7837	-51.1123		-11.8809
-42.3297	-36.791		-7.96913
-52.5047	-74.7146		-4.7478
-62.7699	-97.3364		-8.92191
-50.3874	-88.4023		-9.41539
-48.3757	-77.3364		-4.9105
-60.6436	-54.7439		-5.59643
-52.1632	-43.9805		-5.02504
-60.1741	-34.344		-10.5035
-54.4401	-45.5003		-8.99148
-63.2693	-86.3809		-7.30574
-49.8083	-98.8204		-12.2846
-67.1234	-51.8577		-4.71346
-59.8763	-57.042		-5.63021
-51.6165	-68.2159		-14.0924
-60.1116	-71.4631		-5.20513
-68.4741	-81.3992		-4.60882
-55.8006	-76.7179		-6.42154
-71.8649	-106.62		-5.49382
-55.0999	-107.335		-4.77626
-61.0841	-79.0807		-13.358
-45.392	-90.207		-10.2265
-49.4009	-89.5504		-6.33232
-65.3795	-67.0704		-7.96231
-52.6599	-74.6976		-4.99802
-58.3446	-51.2852		-10.2212
-45.4889	-45.2359		-16.7295
-50.2433	-105.558		-6.26781
-42.8014	-85.3482		-12.8873
-44.6991	-87.1819		-4.49575
-41.7536	-91.7479		-12.4511
-55.0646	-72.4454		-5.66859
	-75.4809		-8.31844
	-86.2544		-15.7639
	-53.3353		-5.20513
	-71.5948		-16.9547
	-77.0392		-7.99966
	-77.438		-12.3724
	-76.4869		-4.93803
	-57.4752		-15.9383
	-60.6615		-9.38368
	-58.6532		-5.70669
	-44.0011		-15.5057
	-32.1908		-6.78666
	-44.1015		-6.76666
	-45.6019		-3.49172
	-66.9623		-14.9434
	-50.5639		-13.3011
	-61.7859		-6.76666
	-53.6267		-2.72462
	-65.6027		-6.4384
	-46.7852		-2.39663
	-84.1452		-9.14682
	-90.12		-9.68769
	-78.7047		-4.99802
	-47.6715		-8.07047
	-78.7473		-3.03508
	-96.2057		-9.63723
	-87.6729		-13.5033
	-84.7476		-4.47157
	-59.8898		-2.5179
	-90.8644		-6.39194
	-105.476		-2.00244
	-95.4011		-4.27328
	-105.727		-11.0417
	-65.7339		-2.98105
	-65.9797		-3.81788
	-94.8073		-4.47157
	-90.9791		-13.4288
	-69.8029		-2.96282
	-38.514		-9.74626
	-29.1624		-2.19604
	-112.425		-8.84873
	-48.1799		-7.23119
	-70.9454		-2.00244
	-76.8262		-6.65769
	-70.0966		-2.19604
	-49.3727		-12.39
	-81.5201		-7.49612
	-87.9473		-4.49575
	-87.5318		-13.2705
	-86.5309		-14.7407
	-70.1845		-3.10569
	-113.103		-7.06825
	-108.649		-2.57115
	-84.9262		-10.2767
	-68.2924		-13.2848
	-90.3699		-7.01825
	-97.6248		-7.85269
	-73.0462		-3.98456
	-92.947		-4.65562
	-101.096		-2.57115
	-49.5712		-4.24785
	-67.1987		-3.26722
	-73.0411		-2.87934
	-40.5238		-4.93254
			-3.3329
			-3.24226
			-4.89394
			-4.32997
			-3.63615
			-3.62123
			-3.6639
			-2.6541
			-2.6541
			-2.6541
			-2.6541
			-2.6541
			-2.6541
			-2.6541
			-2.6541
			-2.6541
			-2.6541
			-2.6541
			-2.6541
			-2.6541
			-2.6541
			-2.6541
			-4.27963
			-3.12308
			-5.03581
			-11.6971
			-3.30843
			-9.47848
			-2.80305
			-2.91673
			-2.37391
			-2.79336
			-3.02614
			-3.29201
			-13.0232
			-2.63361
			-135.219
			-128.535
			-113.043
			-109.382
			-122.517
			-121.063
			-121.376
			-141.422
			-131.448
			-119.591
			-110.755
			-132.286
			-128.826
			-169.666
			-151.157
			-137.273

## Sheet: Figure 6E
Figure 6E
HC trajectory in atoh7 Morphant retina
time (min)	distance from apical (%)
0	-61.8935
5	-67.9959
10	-76.7121
15	-76.2773
20	-77.1469
25	-77.1469
30	-80.1981
35	-83.6866
40	-83.6866
45	-86.7378
50	-88.4795
55	-90.2238
60	-90.6612
65	-89.3517
70	-89.3517
75	-89.789
80	-90.6612
85	-92.8402
90	-89.789
95	-88.9169
100	-87.1726
105	-86.3005
110	-84.5588
115	-87.1726
120	-89.789
125	-89.789
130	-93.275
135	-95.4541
140	-92.8402
145	-93.7124
150	-93.275
155	-90.6612
160	-88.0448
165	-94.5819
170	-95.4541
175	-96.761
180	-96.761
185	-96.761
190	-96.3262
195	-98.5053
200	-95.8914
205	-91.096
210	-90.6612
215	-90.6612
220	-84.5588
225	-85.4284
230	-86.7378
235	-88.9169
240	-88.9169
245	-91.9681
250	-90.6612
255	-90.6612
260	-90.6612
265	-85.8657
270	-87.61
275	-84.5588
280	-81.5076
285	-86.7378
290	-84.5588
295	-88.0448
300	-83.2493
305	-82.8145
310	-81.5076
315	-81.0702
320	-81.0702
325	-78.4564
330	-74.0957
335	-73.6609
340	-73.6609
345	-73.6609
350	-73.6609
355	-77.5843
360	-77.5843
365	-73.6609
370	-76.7121
375	-76.2773
380	-78.8912
385	-78.8912
390	-82.8145
395	-83.2493
400	-83.2493
405	-81.0702
410	-79.3285
415	-74.5331
420	-72.354
425	-70.6097
430	-64.9447
435	-60.1492
440	-57.098
445	-49.6887
450	-40.9699
455	-42.7142
460	-42.7142
465	-37.0491
470	-30.9467
475	-27.8955
480	-25.2791
485	-28.7677
490	-26.5861
495	-29.2025
500	-30.9467
505	-29.2025
510	-30.9467
515	-30.9467
520	-30.9467
525	-30.5094
530	-31.8163
535	-31.8163
540	-31.3815
545	-28.3303
550	-28.3303
555	-26.1513
560
565
570
575
580
585
590
595
600
605
610
615
620
625
630
635
640
645
650
655
660
665
670
675
680
685
690
695
700
705
710
715
720
725
730
735
740
745
750
755
760
765
770
775
780
785
790
795
800
805
810
815
820
825
830
835
840
845
850
855
860
865
870
875
880
885
890
895
900
905
910
915
920
925
930
935
940
945
950
955
960
965
970
975
980
985
990
995
1000
1005
1010
1015
1020
1025
1030
1035
1040
1045
1050
1055
1060
1065
1070
1075
1080
1085
1090
1095
1100
1105
1110
1115
1120
1125
1130
1135
1140
1145
1150
1155
1160
1165
1170
1175
1180
1185
1190
1195
1200
1205
1210
1215
1220
1225
1230
1235
1240

## Sheet: Figure 6-figure supplement 1B-D
Figure 6-figure supplement 1B-D
HC trajectory in atoh7 Morphant retina before and after IPL formation
	Before IPL Formation (Panel B)				Mature IPL (Panel D)
	lateral movenment [micron]	radial movenment [micron]			lateral movenment [micron]	radial movenment [micron]
	-2.287	-53.463			0.762	-32.784
	-2.001	-53.463			1.016	-33.292
	-1.144	-53.463			0.762	-32.784
	-1.716	-53.749			0.762	-32.275
	-2.001	-53.177			-0.254	-33.546
	-1.144	-53.463			-0.508	-35.325
	-1.716	-52.605			-0.508	-35.833
	-1.716	-53.463			0.254	-34.563
	-1.144	-52.891			-0.254	-33.8
	-1.716	-52.605			0.508	-34.054
	-1.43	-52.891			-0.254	-33.8
	-1.144	-51.748			-0.508	-33.546
	-2.001	-52.034			-1.017	-32.021
	-1.43	-51.462			-0.762	-32.021
	-0.572	-51.176			-2.287	-31.767
	-0.858	-50.318			-1.271	-33.038
	-0.858	-49.746			-2.033	-32.784
	-0.858	-48.889			-1.525	-33.8
	-0.286	-47.745			-2.796	-33.292
	-0.286	-46.887			-2.541	-33.292
	-0.572	-45.744			-2.287	-34.309
	-0.572	-42.027			-2.033	-34.309
	-2.001	-42.027			-2.541	-35.071
	-0.858	-43.171			-3.304	-34.563
	-0.858	-43.743			-4.32	-33.8
	-0.858	-46.03			-6.099	-34.309
	-1.144	-44.886			-5.845	-34.817
	-1.43	-43.171			-5.845	-35.325
	-3.431	-42.599			-4.829	-35.579
	-3.431	-40.598			-5.083	-35.071
	-4.289	-38.596			-5.083	-34.563
	-4.575	-36.023			-5.591	-35.579
	-6.004	-34.594			-5.591	-35.325
	-5.432	-34.308			-5.591	-35.325
	-5.146	-36.023			-6.099	-34.309
	-5.718	-34.594			-6.608	-32.784
	-5.718	-33.736			-8.132	-33.038
	-5.146	-33.736			-7.878	-34.054
	-4.575	-34.308			-7.624	-33.8
	-3.431	-33.736			-6.608	-33.546
	-5.718	-31.163			-5.845	-33.8
	-6.576	-29.733			-5.845	-33.8
	-8.291	-29.162			-5.845	-33.038
	-7.719	-30.591			-5.845	-33.038
	-9.149	-29.733			-5.591	-32.275
	-9.149	-27.16			-5.083	-33.292
	-9.149	-25.159			-4.829	-33.292
	-10.007	-23.444			-5.083	-33.038
	-10.293	-20.87			-5.083	-33.038
	-11.15	-17.44			-4.574	-33.292
	-10.578	-17.44			-5.337	-33.038
	-9.721	-18.583			-5.337	-32.784
	-8.577	-17.44			-5.591	-32.53
	-7.148	-17.726			-6.608	-32.021
	-5.718	-18.011			-5.591	-32.784
	-4.003	-17.726			-5.337	-32.53
	-2.859	-18.583			-5.845	-33.038
	-4.86	-17.44			-5.845	-35.833
	-4.289	-19.155			-6.608	-36.596
	-3.717	-18.297			-6.862	-36.596
	-4.575	-17.154			-7.624	-36.85
	-4.289	-17.726			-8.132	-38.883
	-4.86	-18.011			-6.608	-44.728
	-4.575	-17.726			-6.608	-44.728
	-4.003	-16.296			-6.862	-45.236
	-4.86	-16.01			-5.591	-45.745
		-90.059			-5.845	-46.507
					-6.353	-46.507
					-6.353	-45.999
					-6.862	-45.745
					-6.099	-46.761
					-5.337	-46.507
					-4.829	-46.253
					-4.32	-46.761
					-4.066	-47.269
					-5.083	-47.015
					-5.845	-46.253
					-5.845	-45.49
					-5.591	-45.236
					-6.862	-45.49
					-7.37	-46.761
					-6.608	-47.015
					-7.878	-47.524
					-7.116	-48.032
					-6.099	-49.557
					-6.099	-48.794
					-6.099	-48.54
					-5.845	-48.54
					-5.591	-48.54
					-5.083	-49.811
					-4.32	-50.827
					-3.304	-54.131
					-2.287	-54.639
					-2.033	-55.402
					-1.779	-55.656
					-4.066	-55.148
					-3.812	-54.893
					-2.796	-55.91
					-2.033	-55.656
					-0.762	-55.402
					-1.525	-55.148
					-2.541	-54.639
					-2.287	-54.385
					-1.525	-54.385
					-1.525	-54.385
					-1.271	-54.385
					-0.762	-54.639
					-0.508	-55.656
					1.271	-55.656
					1.525	-55.656
					1.779	-54.893
					2.033	-54.385
					2.033	-54.893
					2.033	-54.639
					2.033	-54.131
					1.779	-53.114
					0.254	-52.606
					-0.762	-51.336
					-4.32	-48.794
					-7.878	-47.015
					-12.961	-50.827
					-13.215	-51.59
					-13.215	-51.59
					-14.232	-51.844
					-12.453	-52.098
					-7.116	-55.148
					-7.37	-54.385
					-7.624	-54.893
					-7.116	-54.893
					-7.37	-54.639
					-6.608	-54.385
					-4.829	-53.877
					-4.574	-52.86
					-2.287	-51.844
					-0.508	-51.844
					0.508	-51.336
					1.525	-51.336
					0.254	-52.606
					0.762	-51.59
					0.762	-51.844
					0.508	-51.844
					0.254	-52.098
					0.508	-51.59
					0.508	-51.336
					0.508	-51.336
					0.508	-51.336
					0.508	-51.336
					-0.254	-51.081
					-0.762	-51.844
					-0.762	-51.59
					-0.254	-51.59
					-0.254	-51.336
					0.254	-51.336
					-0.254	-51.59
					0.254	-52.098
					-0.254	-52.098
					1.016	-50.827
					0	-51.336
					-0.254	-52.352
					-1.779	-51.59
					-1.017	-52.606
					-0.762	-52.606
					0	-52.86
					-0.762	-52.098
					-1.017	-52.352
					-0.508	-51.844
					0.508	-51.59
					-0.254	-51.336
					0	-51.081
					0.508	-51.844
					0.762	-51.844
					0	-51.59
					0.254	-51.844
					0.254	-51.844
					0	-52.098
					0.254	-51.844
					0.254	-52.098
					0.254	-51.336
					1.016	-51.844
					1.525	-51.844
					1.779	-51.59
					1.271	-51.081
					1.271	-50.827
					1.779	-51.336
					2.033	-51.336
					1.779	-51.844
					1.779	-51.336
					1.779	-51.336
					1.525	-51.59
					1.525	-51.59
					1.525	-51.59
					1.525	-51.59
					2.033	-51.844
					2.033	-51.844
					1.271	-51.59
					1.271	-52.352
					1.525	-52.098
					1.271	-52.606
					1.271	-52.352
					1.271	-52.098
					0.762	-52.352
					1.016	-52.098
					0.254	-52.098
					0	-51.844
					-0.254	-52.098
					-0.254	-52.098
					-0.254	-52.098
					-0.254	-52.098
					-0.254	-52.352
					-0.254	-52.352
					-0.508	-52.86
					-0.508	-52.86
					0.254	-53.369
					0.254	-53.369
					1.271	-54.385
					0.762	-53.114
					0.254	-53.114
					-1.271	-52.86
					-0.254	-53.877
					-0.254	-53.623
					-0.254	-53.623
					-0.762	-53.369
					-0.762	-53.369
					-0.762	-53.623
					-1.271	-53.369
					-1.017	-54.385
					-0.254	-54.131
					0	-53.877
					-1.779	-53.114
					-2.033	-53.114
					-1.271	-54.639
